# Supplementary material for: Trapoxin A Analogue as a Selective Nanomolar Inhibitor of HDAC11
Source: PubMed Central journal article supplement (PMC10127203; doi:10.1021/acschembio.2c00840), 2023-03-28

## SUPPORTING INFORMATION

### A Trapoxin A analog as a selective nanomolar inhibitor of HDAC11

Thanh Tu Ho<sup>a</sup>, Changmin Peng<sup>b</sup>, Edward Seto<sup>b</sup>, Hening Lin<sup>a,c,\*</sup>

<sup>a</sup> Department of Chemistry and Chemical Biology, Cornell University, Ithaca, NY 14853, USA.

<sup>b</sup> Department of Biochemistry & Molecular Medicine, School of Medicine & Health Sciences, George Washington Cancer Center, George Washington University, Washington, DC, 20037, USA

<sup>c</sup> Howard Hughes Medical Institute, Cornell University, Ithaca, NY 14853, USA

\* Corresponding author. Email: hl379@cornell.edu

**REAGENTS.** Chemical reagents and solvents were purchased from Sigma-Aldrich, Fisher Scientific, Combi-blocks, Chem-Impex, and were used as received unless otherwise noted. Anti-FLAG affinity gel (A2220), 3X FLAG peptide (F4799), Amicon Ultra-4 (30 kDa cutoff), antibody against  $\beta$ -actin (A2228) were purchased from Sigma Aldrich. Trapoxin A (sc-253730), antibodies against SHMT2 (sc-390641 HRP), acetyl- $\alpha$ -tubulin (sc-23950 HRP), GAPDH (sc-47724 HRP) were purchased from Santa Cruz Biotechnology. Antibodies against Acetyl-histone H3 (9675), YAP (4912) and HDAC11 (58442) were purchased from Cell Signaling Technologies. Streptavidin magnetic beads, universal nuclease for cell lysis were purchased from Thermo Scientific. Clarity MAX western blot visualizing reagent was purchased from BioRad.

Modified and unmodified H3K9 peptide were purchased from Biomatik. The sequences are as follows:

H3K9 unmodified:       KQTARKSTGGWW  
Ac-H3K9:                KQTARK(Ac)STGGWW  
Myr-H3K9:              KQTARK(Myr)STGGWW

**INSTRUMENT.** Analytical thin layer chromatography (TLC) was performed on precoated glass-backed silica gel 60 F254 plates (EMD Millipore), visualized by UV 254 nm, or by potassium permanganate (KMnO<sub>4</sub>), phosphomolybdic acid (PMA) or 2,4-dinitrophenylhydrazine (DNP) staining. Silica gel flash chromatography was performed on a Teledyne ISCO CombiFlash Nextgen+.

Analytical high performance liquid chromatography (HPLC) was carried out on a Shimadzu LC-2020. Mobile phase A: 0.1% trifluoroacetic acid (TFA) in water. Mobile phase B: 0.1% trifluoroacetic acid (TFA) in acetonitrile.

<sup>1</sup>H and <sup>13</sup>C nuclear magnetic resonance (NMR) spectra were recorded on a Bruker AVIII-500 (500 MHz). Chemical shifts ( $\delta$ ) were reported in parts per million (ppm) and referenced to TMS ( $\delta$  = 0). Coupling constant (J) were reported in hertz (Hz), and multiplicities were listed as follows: br = broad, s = singlet, d = doublet, t = triplet, q = quartet, m = multiplet.

Accurate mass was recorded on a Thermo Fisher Q Exactive Orbitrap with Direct Analysis in Real Time (DART) ion source, using dioctyl adipate, calcd. for C<sub>22</sub>H<sub>43</sub>O<sub>4</sub><sup>+</sup> [M+H]<sup>+</sup> 371.3156 as the lockmass.

## PRIMERS FOR qRT-PCR

ACTIN Forward: ATCACCATTGGCAATGAGCG  
ACTIN Reverse: TTGAAGGTAGTTTCGTGGAT  
CTGF Forward: ACCGACTGGAAGACACGTTTG  
CTGF Reverse: CCAGGTCAGCTTCGCAAGG  
CYR61 Forward: GGTCAAAGTTACCGGGCAGT  
CYR61 Reverse: GGAGGCATCGAATCCCAGC  
YAP Forward: TAGCCCTGCGTAGCCAGTTA  
YAP Reverse: TCATGCTTAGTCCACTGTCTGT

## HDAC11 CRISPR gRNA SEQUENCE

TGATGGACAGCCCCCAAGG

## ACTIVITY ASSAY DATA FOR OTHER INHIBITORS

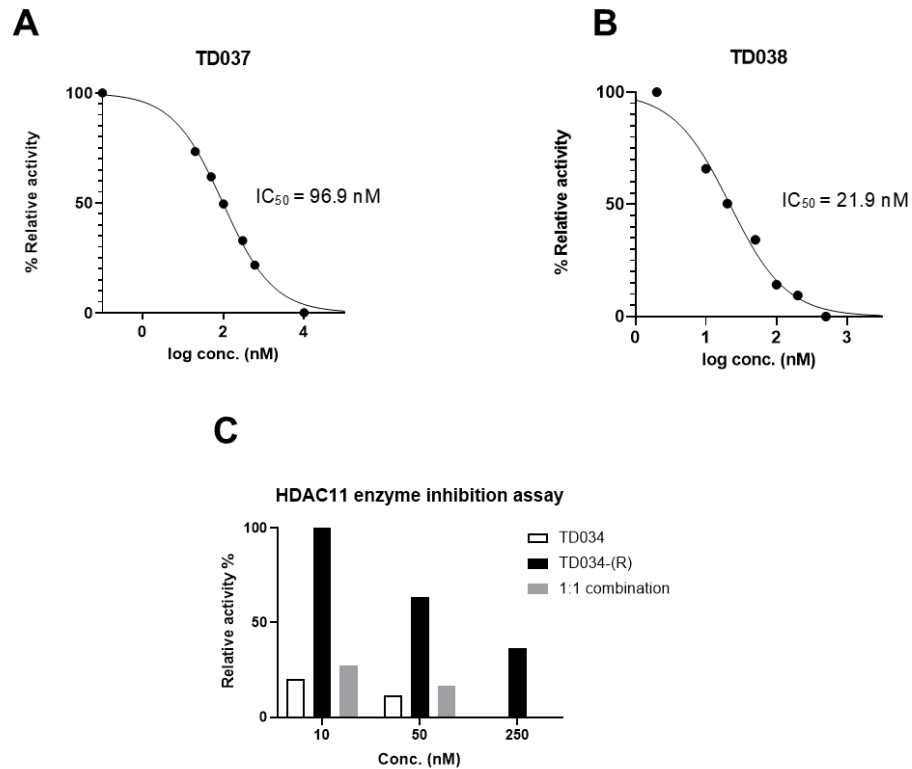

**Figure S1:** A,B) IC<sub>50</sub> curve for TD037 & TD038; C) TD034-(R) is less potent than TD034

## STABILITY OF TD034 UNDER ASSAY CONDITION

A

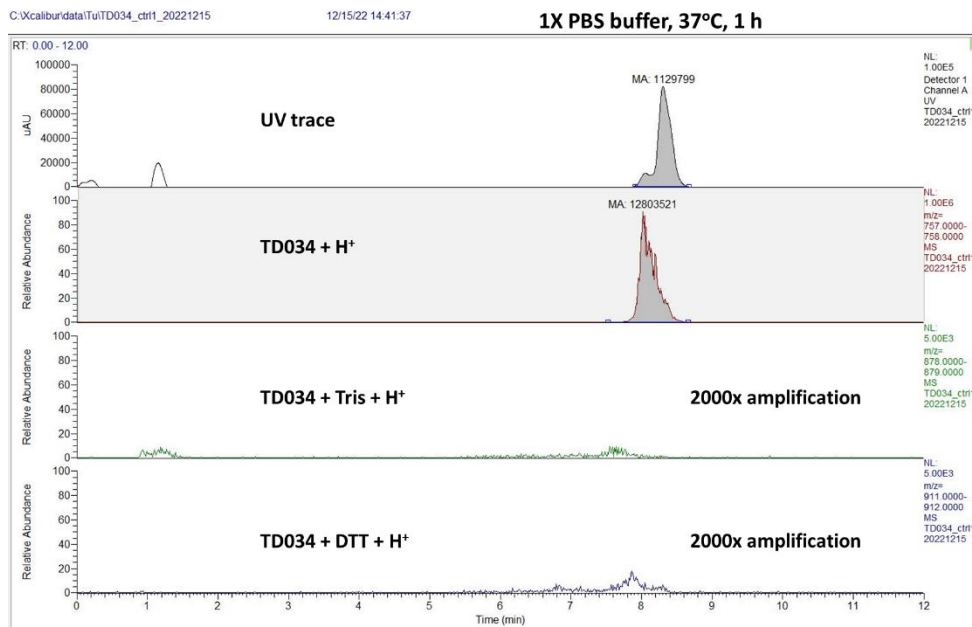

B

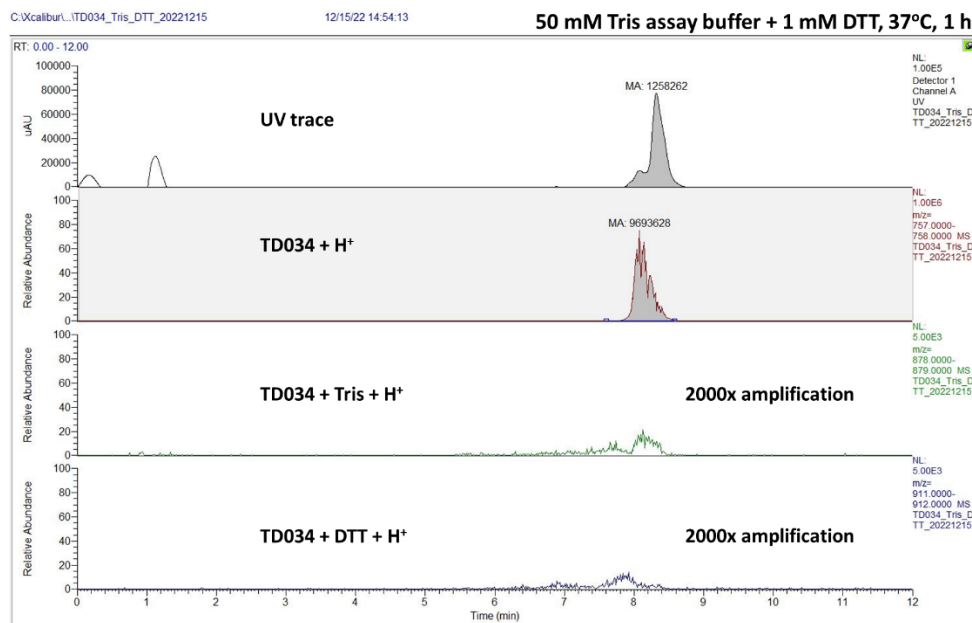

**Figure S2:** TD034 is relatively stable in the presence of Tris & DTT.

- A) TD034 (100  $\mu$ M) in PBS buffer (pH 7.4, 137 mM NaCl, 2.7 mM KCl, 4.3 mM Na<sub>2</sub>HPO<sub>4</sub>, 1.47 mM KH<sub>2</sub>PO<sub>4</sub>).
- B) TD034 (100  $\mu$ M) in assay buffer with DTT (pH 8.0, 50 mM Tris/Cl, 137 mM NaCl, 2.7 mM KCl, 1 mM MgCl<sub>2</sub>, 1 mM DTT).

## GENERAL SYNTHESIS OF EPOXYKETONE MOTIFS

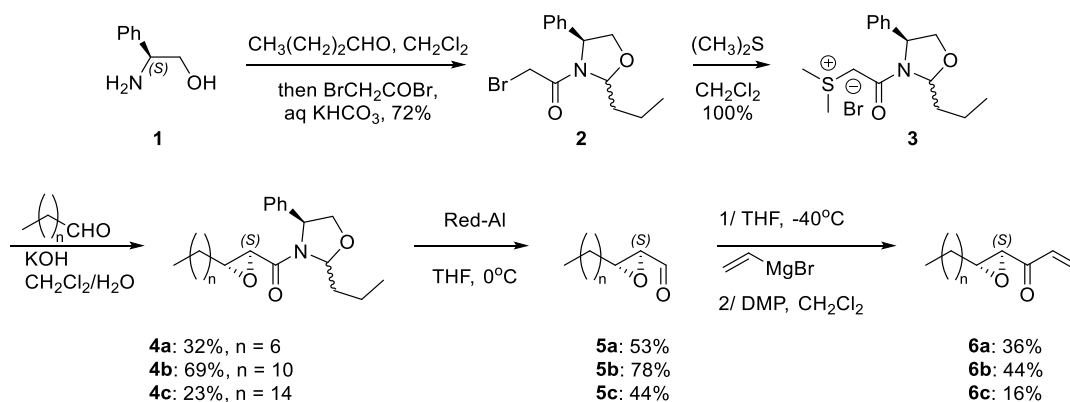

Scheme S1

**Synthesis of 2:** To a solution of (S)-phenylglycinol (6.86 g, 50 mmol) in CH<sub>2</sub>Cl<sub>2</sub> (200 mL) was added butyraldehyde (9 mL, 100 mmol). The cloudy solution was stirred for 30 min, then 5% aqueous KHCO<sub>3</sub> was added (200 mL) with vigorous stirring. Bromoacetyl bromide (50 mmol, 4.36 mL) was added dropwise, then the 2-phase mixture was vigorously stirred for 1 h. The phases were then separated, and the aqueous was extracted with CH<sub>2</sub>Cl<sub>2</sub> (50 mL). The combined organic phase was dried with Na<sub>2</sub>SO<sub>4</sub>, filtered, and then evaporated. Flash chromatography (0 - 25% ethyl acetate/hexane) afforded the product **2** as a colourless oil (11.3 g, 72%). <sup>1</sup>H NMR (500 MHz, CDCl<sub>3</sub>) δ 7.47 – 7.29 (m, 5H), 5.42 (dd, *J* = 9.1, 2.5 Hz, 1H), 5.08 (t, *J* = 6.0 Hz, 1H), 4.35 (dd, *J* = 9.0, 6.9 Hz, 1H), 4.00 (dd, *J* = 9.1, 5.2 Hz, 1H), 3.53 (d, *J* = 2.8 Hz, 2H), 2.26 – 2.14 (m, 1H), 1.73 (dtd, *J* = 14.4, 9.4, 5.4 Hz, 1H), 1.64 – 1.47 (m, 2H), 1.01 (t, *J* = 7.4 Hz, 3H). <sup>13</sup>C NMR (126 MHz, CDCl<sub>3</sub>) δ 165.10, 139.05, 129.37, 128.57, 126.12, 92.02, 73.77, 60.79, 35.25, 27.96, 18.61, 13.90. <sup>1</sup>HRMS (DART) calcd. for C<sub>14</sub>H<sub>19</sub>BrNO<sub>2</sub><sup>+</sup> [M+H]<sup>+</sup> 312.0594, found 312.0596.

**Synthesis of 3:** To a solution of **2** (11.3 g, 36.2 mmol) in CH<sub>2</sub>Cl<sub>2</sub> (20 mL) was added dimethylsulfide (5.36 mL, 72.4 mmol). The solution was vigorously stirred for 4 hours, then evaporated to afford product **3** as a white solid (13.6 g, 100%). <sup>1</sup>H NMR (500 MHz, CDCl<sub>3</sub>) δ 7.43 (d, *J* = 22.3 Hz, 4H), 7.34 – 7.30 (m, 1H), 6.36 (d, *J* = 16.1 Hz, 1H), 5.60 (dd, *J* = 6.7, 4.2 Hz, 1H), 5.36 (dd, *J* = 9.1, 2.4 Hz, 1H), 4.39 (dd, *J* = 9.0, 6.8 Hz, 1H), 4.00 (dd, *J* = 9.1, 4.2 Hz, 1H), 3.73 (d, *J* = 16.0 Hz, 1H), 3.37 – 3.17 (m, 6H), 2.16 (dddd, *J* = 13.0, 9.9, 6.1, 2.2 Hz, 1H), 1.72 (dtd, *J* = 14.1, 9.5, 5.1 Hz, 1H), 1.62 – 1.49 (m, 2H), 1.01 (t, *J* = 7.4 Hz, 3H). <sup>13</sup>C NMR (126 MHz, CDCl<sub>3</sub>) δ 162.23, 138.68, 129.42, 129.35, 128.86, 128.54, 126.70, 126.30, 126.09, 91.79, 73.95, 60.53, 48.17, 35.15, 25.44, 25.10, 18.50, 18.10, 13.93, 13.87. HRMS (DART) calcd. for C<sub>15</sub>H<sub>22</sub>NO<sub>2</sub>S<sup>+</sup> [M-CH<sub>3</sub>Br+H]<sup>+</sup> 280.1366, found 280.1363.

**General synthesis of 4:** To a mixture of **3** in 1:1 CH<sub>2</sub>Cl<sub>2</sub>:water (1.0 M) was added KOH (1.1 eq.), and the mixture was vigorously stirred for 1 min. Aliphatic aldehyde (1.5 eq) was added, and the mixture was vigorously stirred overnight. The phases were separated, and the aqueous phase was extracted with CH<sub>2</sub>Cl<sub>2</sub> (5 mL/mmol). The combined organic phase was dried with Na<sub>2</sub>SO<sub>4</sub>, filtered, and then evaporated. Flash chromatography (0 - 25% ethyl acetate/hexane) afforded products **4a-c**.

**4a:** 3.2 g, 32%. <sup>1</sup>H NMR (500 MHz, CDCl<sub>3</sub>) δ 7.45 – 7.29 (m, 5H), 5.51 (dd, *J* = 9.3, 2.7 Hz, 1H), 5.15 (t, *J* = 6.5 Hz, 1H), 4.43 – 4.35 (m, 1H), 3.97 (dd, *J* = 8.8, 5.7 Hz, 1H), 3.00 – 2.91 (m, 2H), 2.23 – 2.13 (m, 1H), 1.72 (ddd, *J* = 21.1, 10.9, 6.9 Hz, 1H), 1.54 (dq, *J* = 16.3, 8.7 Hz, 3H), 1.28 – 1.00 (m, 14H), 0.87 (dd, *J* = 8.2, 6.1 Hz, 3H). <sup>13</sup>C NMR (126 MHz, CDCl<sub>3</sub>) δ 166.65, 139.83, 129.27, 129.24, 128.34, 126.05, 91.75, 73.76, 60.36, 58.65, 53.62, 35.14, 31.71, 31.66, 30.86, 29.10, 29.07, 28.99, 25.17, 22.61, 18.58, 14.08, 13.92. HRMS (DART) calcd. for C<sub>22</sub>H<sub>34</sub>NO<sub>3</sub><sup>+</sup> [M+H]<sup>+</sup> 360.2533, found 360.2531.

**4b:** 10.37 g, 69%. <sup>1</sup>H NMR (500 MHz, CDCl<sub>3</sub>) δ 7.46 – 7.28 (m, 5H), 5.51 (dd, *J* = 9.2, 2.5 Hz, 1H), 5.15 (t, *J* = 6.4 Hz, 1H), 4.39 (dd, *J* = 9.0, 7.0 Hz, 1H), 3.97 (dd, *J* = 9.1, 5.9 Hz, 1H), 3.00 – 2.92 (m, 2H), 2.18 (dddd, *J* = 13.1, 9.6, 6.2, 2.5 Hz, 1H), 1.72 (dtd, *J* = 14.3, 9.5, 5.4 Hz, 1H), 1.61 – 1.48 (m, 3H), 1.30 – 1.00 (m, 22H), 0.88 (t, *J* = 6.9 Hz, 3H). <sup>13</sup>C NMR (126 MHz, CDCl<sub>3</sub>) δ 166.65, 139.84, 129.27, 128.34, 126.05, 91.76, 73.76, 60.37, 58.65, 53.64, 35.15, 31.93, 30.88, 29.62, 29.47, 29.35, 29.13, 25.19, 22.70, 18.58, 14.14, 13.91. HRMS (DART) calcd. for C<sub>26</sub>H<sub>42</sub>NO<sub>3</sub><sup>+</sup> [M+H]<sup>+</sup> 416.3159, found 416.3154.

**4c:** 2.97 g, 23%. <sup>1</sup>H NMR (500 MHz, CDCl<sub>3</sub>) δ 7.44 – 7.31 (m, 5H), 5.51 (d, *J* = 9.2 Hz, 1H), 5.15 (t, *J* = 6.6 Hz, 1H), 4.39 (td, *J* = 7.9, 1.8 Hz, 1H), 3.97 (t, *J* = 7.6 Hz, 1H), 3.00 – 2.92 (m, 2H), 2.18 (dtd, *J* = 13.6, 6.9, 3.7 Hz, 1H), 1.72 (dhept, *J* = 14.7, 4.9 Hz, 1H), 1.54 (td, *J* = 15.1, 7.5 Hz, 3H), 1.28 – 1.01 (m, 30H), 0.88 (td, *J* = 6.4, 3.6 Hz, 3H). <sup>13</sup>C NMR (126 MHz, CDCl<sub>3</sub>) δ 166.65, 139.83, 129.28, 128.35, 126.05, 91.76, 73.76, 60.37, 58.66, 53.63, 35.15, 31.94, 30.88, 29.72, 29.71, 29.68, 29.63, 29.48, 29.38, 29.36, 29.13, 25.19, 22.71, 18.58, 14.15, 13.92. HRMS (DART) calcd. for C<sub>30</sub>H<sub>50</sub>NO<sub>3</sub><sup>+</sup> [M+H]<sup>+</sup> 472.3785, found 472.3783.

**General synthesis of 5:** To a solution of **4a-c** in THF (0.1 M) at 0 °C was added dropwise Red-Al (1.5 eq., 3.5 M in toluene), then the solution was stirred for 15 min. The reaction was quenched carefully with 1M aqueous HCl (5 eq.), then diluted with CH<sub>2</sub>Cl<sub>2</sub> (20 mL/mmol). The phases were separated, and the aqueous phase was extracted with CH<sub>2</sub>Cl<sub>2</sub> (5 mL/mmol). The combined organic phase was dried with Na<sub>2</sub>SO<sub>4</sub>, filtered then evaporated. Flash chromatography (0 - 10% ethyl acetate/hexane) afforded products **5a-c**.

**5a:** 810 mg, 53%. Highly unstable. <sup>1</sup>H NMR (500 MHz, CDCl<sub>3</sub>) δ 9.02 (dd, *J* = 6.2, 1.7 Hz, 1H), 3.30 – 2.77 (m, 2H), 1.69 – 1.27 (m, 12H), 0.89 (t, *J* = 6.7 Hz, 3H). <sup>13</sup>C NMR (126 MHz, CDCl<sub>3</sub>) δ 198.57, 59.19, 56.83, 31.70, 31.22, 29.20, 29.10, 25.79, 22.62, 14.08. HRMS (DART) calcd. for C<sub>10</sub>H<sub>19</sub>O<sub>2</sub><sup>+</sup> [M+H]<sup>+</sup> 171.1380, found 171.1381.

**5b:** 4.43 g, 78%. <sup>1</sup>H NMR (500 MHz, CDCl<sub>3</sub>) δ 9.02 (d, *J* = 6.3 Hz, 1H), 3.26 – 3.20 (m, 1H), 3.13 (dd, *J* = 6.3, 1.9 Hz, 1H), 1.72 – 1.58 (m, 2H), 1.47 (qt, *J* = 12.8, 4.0 Hz, 2H), 1.27 (d, *J* = 10.0 Hz, 16H), 0.88 (t, *J* = 6.8 Hz, 3H). <sup>13</sup>C NMR (126 MHz, CDCl<sub>3</sub>) δ 198.54, 59.19, 56.82, 31.92, 31.22, 29.61, 29.49, 29.44, 29.34, 29.24, 25.78, 22.69, 14.13. HRMS (DART) calcd. for C<sub>14</sub>H<sub>27</sub>O<sub>2</sub><sup>+</sup> [M+H]<sup>+</sup> 227.2006, found 227.2005.

**5c:** 786 mg, 44%. <sup>1</sup>H NMR (500 MHz, CDCl<sub>3</sub>) δ 9.02 (dd, *J* = 6.5, 2.1 Hz, 1H), 3.22 (d, *J* = 5.8 Hz, 1H), 3.13 (dd, *J* = 6.3, 2.4 Hz, 1H), 1.66 (qt, *J* = 13.6, 6.9 Hz, 2H), 1.57 – 1.40 (m, 3H), 1.26 (s, 23H), 0.88 (td, *J* = 7.0, 2.3 Hz, 3H). <sup>13</sup>C NMR (126 MHz, CDCl<sub>3</sub>) δ 198.56, 59.19, 56.83, 31.94, 31.23, 29.71, 29.69, 29.67, 29.66, 29.62, 29.50, 29.44, 29.38, 29.25, 25.79, 22.71, 14.15. HRMS (DART) calcd. for C<sub>18</sub>H<sub>35</sub>O<sub>2</sub><sup>+</sup> [M+H]<sup>+</sup> 283.2632, found 283.2631.

**General synthesis of 6:** To a solution of **5a-c** in THF (0.1 M) at -40 °C was added dropwise vinylmagnesium bromide (1.25 eq., 1.0 M in THF), then the solution was stirred for 1 h. The reaction was quenched with saturated NH<sub>4</sub>Cl solution (5 eq.), warmed to room temperature, then diluted with CH<sub>2</sub>Cl<sub>2</sub> (20 mL/mmol). The phases were separated, and the aqueous phase was extracted with CH<sub>2</sub>Cl<sub>2</sub> (5 mL/mmol). The combined organic phase was dried with Na<sub>2</sub>SO<sub>4</sub>, filtered then evaporated. Flash chromatography (0 - 25% EA:Hexane) afforded a mixture of epimeric alcohols, which was used directly in the next step. The alcohols were dissolved in CH<sub>2</sub>Cl<sub>2</sub> (0.5 M), then NaHCO<sub>3</sub> (6 eq.) and Dess-Martin periodinane (2 eq.) were added. The mixture was vigorously stirred for 15 min, then H<sub>2</sub>O (2 eq.) was added. The mixture was vigorously stirred for another 15 min, then diluted with hexane (20 mL/mmol). The mixture was filtered through a pad silica gel, washing with 1:4 ethyl acetate/hexane (10 mL/mmol), and the combined organic phase was evaporated to afford product **6a-c**.

**6a:** 337 mg, 36%. <sup>1</sup>H NMR (500 MHz, CDCl<sub>3</sub>) δ 6.55 – 6.41 (m, 2H), 5.84 (dd, *J* = 9.8, 2.6 Hz, 1H), 3.40 (d, *J* = 2.3 Hz, 1H), 3.08 (t, *J* = 5.7 Hz, 1H), 1.71 – 1.61 (m, 2H), 1.53 – 1.40 (m, *J* = 6.7 Hz, 2H), 1.31 (dtd, *J* = 25.1, 12.9, 8.3 Hz, 8H), 0.88 (t, *J* = 6.5 Hz, 3H). <sup>13</sup>C NMR (126 MHz, CDCl<sub>3</sub>) δ 196.00, 130.58, 130.40, 58.91, 58.40, 31.80, 31.71, 29.23, 29.13, 25.81, 22.62, 14.09. HRMS (DART) calcd. for C<sub>12</sub>H<sub>21</sub>O<sub>2</sub><sup>+</sup> [M+H]<sup>+</sup> 197.1536, found 197.1538.

**6b**: 2.17 g, 44%. <sup>1</sup>H NMR (500 MHz, CDCl<sub>3</sub>) δ 6.58 – 6.43 (m, 2H), 5.86 (dd, *J* = 9.7, 2.4 Hz, 1H), 3.42 (d, *J* = 1.9 Hz, 1H), 3.10 (ddd, *J* = 5.9, 5.0, 2.0 Hz, 1H), 1.75 – 1.60 (m, 2H), 1.57 – 1.42 (m, 2H), 1.38 – 1.27 (m, 16H), 0.90 (t, *J* = 6.9 Hz, 3H). <sup>13</sup>C NMR (126 MHz, CDCl<sub>3</sub>) δ 195.98, 130.55, 130.41, 58.92, 58.39, 31.92, 31.80, 29.62, 29.50, 29.46, 29.34, 29.27, 25.80, 22.70, 14.13. HRMS (DART) calcd. for C<sub>16</sub>H<sub>29</sub>O<sub>2</sub><sup>+</sup> [M+H]<sup>+</sup> 253.2162, found 253.2161.

**6c**: 136 mg, 16%. <sup>1</sup>H NMR (500 MHz, CDCl<sub>3</sub>) δ 6.56 – 6.42 (m, 2H), 5.85 (dd, *J* = 9.7, 2.8 Hz, 1H), 3.40 (s, 1H), 3.08 (dq, *J* = 6.3, 2.9 Hz, 1H), 1.72 – 1.59 (m, 2H), 1.55 – 1.41 (m, 3H), 1.26 (s, 23H), 0.88 (td, *J* = 7.1, 2.7 Hz, 3H). <sup>13</sup>C NMR (126 MHz, CDCl<sub>3</sub>) δ 196.01, 130.58, 130.41, 58.92, 58.41, 31.94, 31.81, 29.71, 29.67, 29.63, 29.51, 29.47, 29.38, 29.28, 25.81, 22.71, 14.15. HRMS (DART) calcd. for C<sub>20</sub>H<sub>37</sub>O<sub>2</sub><sup>+</sup> [M+H]<sup>+</sup> 309.2788, found 309.2789.

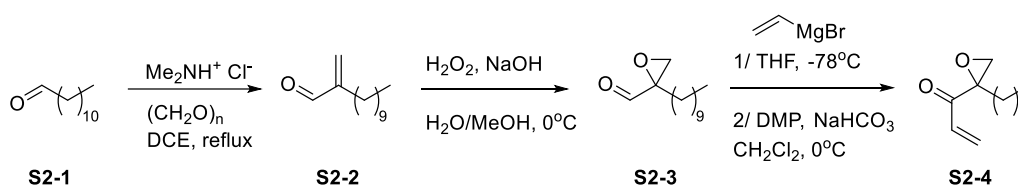

**Scheme S2**

**Synthesis of S2-4**: A solution of dodecanal (222 μL, 1 mmol), paraformaldehyde (300 mg, 10 mmol), dimethylamine hydrochloride (407 mg, 5 mmol) in DCE (5 mL) was refluxed for 3 h. The solution was diluted with hexane (20 mL) then filter through a silica plug. The eluant was evaporated to afford crude **S2-2** (80 mg), which was dissolved in MeOH (2 mL). Hydrogen peroxide 30% (82 μL, 0.8 mmol) and 5 M aqueous NaOH (16 μL) was premixed, then added to the solution at 0 °C. The solution was stirred for 30 min, then quenched with saturated aqueous Na<sub>2</sub>S<sub>2</sub>O<sub>5</sub> (5 mL). The mixture was extracted with CH<sub>2</sub>Cl<sub>2</sub> (3 x 10 mL), and the combined organic phase was dried with Na<sub>2</sub>SO<sub>4</sub>, filtered then evaporated to afford crude **S2-3**, which was dissolved in THF (2 mL) at -78 °C. Vinylmagnesium bromide (0.5 mL, 1 M in THF) was added, then the solution was stirred for 1 h. The reaction was quenched with saturated aqueous NH<sub>4</sub>Cl (5 mL), then warmed to room temperature. The mixture was extracted with CH<sub>2</sub>Cl<sub>2</sub> (3 x 10 mL), and the combined organic phase was dried with Na<sub>2</sub>SO<sub>4</sub>, filtered then evaporated to afford crude epimeric alcohols (30 mg), which was dissolved in CH<sub>2</sub>Cl<sub>2</sub> (2 mL). To the solution was added NaHCO<sub>3</sub> (55 mg, 0.65 mmol), Dess-Martin periodinane (110 mg, 0.26 mmol), then water (4.7 μL). The mixture was stirred for 1 h, diluted with hexane (8 mL), then filtered through a silica plug, washing with 1:4 ethyl acetate/hexane (10 mL). The eluant was evaporated to afford **S2-4** as an oil (22 mg, 9% in 4 steps). <sup>1</sup>H NMR (500 MHz, CDCl<sub>3</sub>) δ 6.60 (dd, *J* = 17.3, 10.4 Hz, 1H), 6.44 (dd, *J* = 17.3, 2.0 Hz, 1H), 5.74 (dd, *J* = 10.4, 2.0 Hz, 1H), 2.95 – 2.88 (m, 2H), 2.21 (ddd, *J* = 14.2, 10.4, 5.1 Hz, 1H), 1.58 (ddd, *J* = 14.2, 10.4, 5.4 Hz, 1H), 1.39 (dddd, *J* = 11.8, 10.3, 5.1, 2.1 Hz, 2H), 1.26 (d, *J* = 12.0 Hz, 14H), 0.88 (t, *J* = 6.9 Hz, 3H). <sup>13</sup>C NMR (126 MHz, CDCl<sub>3</sub>) δ 197.86, 130.52, 128.74, 62.38, 50.56, 31.90, 30.28, 29.67, 29.57, 29.51, 29.43, 29.31, 24.67, 22.68, 14.11.

## GENERAL PROCEDURE FOR CYCLIC PEPTIDE SYNTHESSES

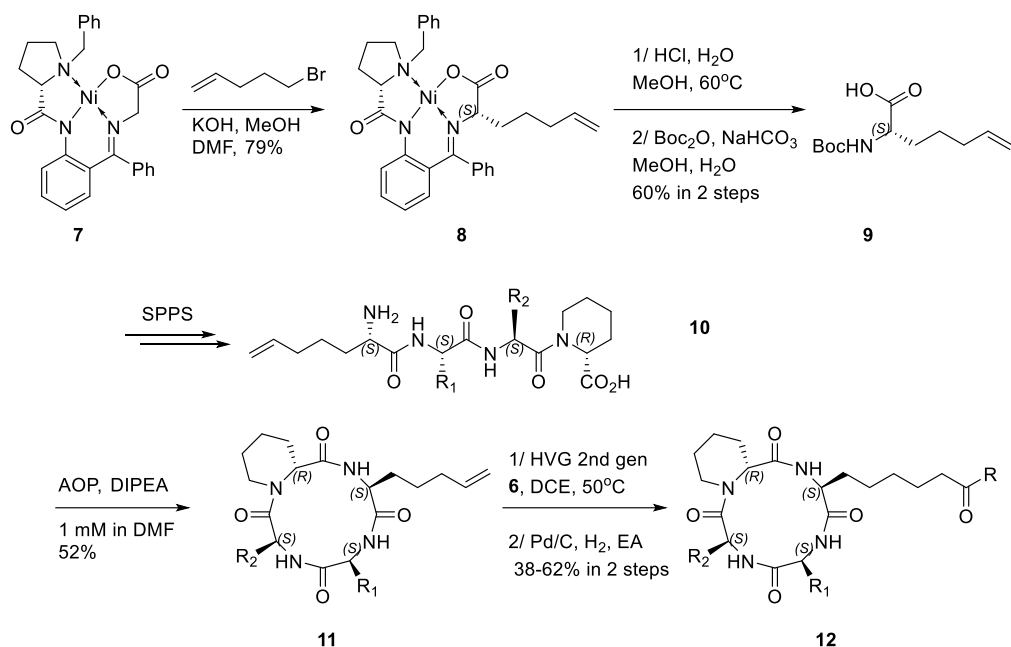

**Scheme S3**

**Synthesis of 8:** To a degassed solution of complex **7** (8.41 g, 16.9 mmol)<sup>2</sup> and 5-bromo-1-pentene (2.1 mL, 17.8 mmol) in DMF (100 mL) was added dropwise KOH (8.9 mL, 2M in MeOH). The solution was stirred for 1 h, then quenched with AcOH (1 mL). The mixture was diluted with ethyl acetate (400 mL), then washed with water (5 x 100 mL). The organic phase was dried with Na<sub>2</sub>SO<sub>4</sub>, filtered, and then evaporated. Flash chromatography (0 – 15% acetone/CH<sub>2</sub>Cl<sub>2</sub>) afforded **8** as a red solid (7.6 g, 79%). <sup>1</sup>H NMR (500 MHz, CDCl<sub>3</sub>) δ 8.16 (dd, *J* = 8.7, 1.2 Hz, 1H), 8.10 – 8.03 (m, 2H), 7.57 – 7.45 (m, 3H), 7.37 (t, *J* = 7.8 Hz, 2H), 7.25 – 7.14 (m, 2H), 6.94 (dt, *J* = 8.2, 1.4 Hz, 1H), 6.71 – 6.63 (m, 2H), 5.75 (ddt, *J* = 16.9, 10.2, 6.7 Hz, 1H), 5.05 – 4.94 (m, 2H), 4.47 (d, *J* = 12.7 Hz, 1H), 3.93 (dd, *J* = 8.1, 3.5 Hz, 1H), 3.68 – 3.46 (m, 4H), 2.79 (dt, *J* = 14.5, 7.2 Hz, 1H), 2.61 – 2.52 (m, 1H), 2.30 – 1.92 (m, 7H), 1.74 – 1.64 (m, 2H). <sup>13</sup>C NMR (126 MHz, CDCl<sub>3</sub>) δ 180.39, 179.43, 170.40, 142.25, 137.78, 133.83, 133.26, 133.20, 132.16, 131.60, 129.73, 128.95, 128.94, 128.90, 127.63, 127.20, 126.54, 123.72, 120.76, 115.28, 70.37, 70.26, 63.10, 56.96, 34.84, 33.33, 30.76, 24.65, 23.65. HRMS (DART) calcd. for C<sub>32</sub>H<sub>34</sub>N<sub>3</sub>NiO<sub>3</sub><sup>+</sup> [M+H]<sup>+</sup> 566.1948, found 566.1961.

**Synthesis of 9:** A solution of **8** (26.6 g, 47 mmol) in MeOH (200 mL) was added HCl (78 mL, 3 M in H<sub>2</sub>O). The mixture was degassed, then refluxed for 1-2 h until the color turned green. The solution was evaporated, then CH<sub>2</sub>Cl<sub>2</sub> (200 mL) and water (200 mL) were added. The phases were separated, then the organic phase was extracted with water (100 mL). The combined aqueous phase was neutralized with concentrated aqueous NH<sub>4</sub>OH to pH = 8. The mixture was eluted through a column of DOWEX-50WX4 (40 mL), washing with ethanol (200 mL), water (200 mL), then eluted with 5% aqueous NH<sub>4</sub>OH (500 mL). The ninhydrin-positive fractions were combined and evaporated to afford the amino acid (4.2 g, 62%). To a solution of the amino acid (2.6 g, 18.2 mmol) in MeOH/H<sub>2</sub>O (1:1, 100 mL) was added NaHCO<sub>3</sub> (2.73 g, 32.5 mmol) and Boc<sub>2</sub>O (5.6 mL, 24.4 mmol). The solution was vigorously stirred overnight, then quenched with HCl (40 mL, 1M in H<sub>2</sub>O), and diluted with ethyl acetate (200 mL). The phases were separated, and the aqueous phase was extracted with EA (2 x 50 mL). The combined organic phase was dried with Na<sub>2</sub>SO<sub>4</sub>, filtered then evaporated. Flash chromatography (0 – 50% ethyl acetate/hexane) afforded **9** as a colourless oil (4.3 g, 97%). <sup>1</sup>H NMR (500 MHz, CDCl<sub>3</sub>) δ 5.83 – 5.72 (m, 1H), 5.08 – 5.00 (m, 1H), 4.98 (d, *J* = 10.0 Hz, 2H), 4.23 (dd, *J* = 87.0, 7.0 Hz, 1H), 2.08 (p, *J* = 8.4 Hz, 2H), 1.88 (s, 1H), 1.67 (dt, *J* = 14.8, 7.5 Hz, 1H), 1.57 – 1.39 (m, 10H). <sup>13</sup>C NMR (126 MHz, CDCl<sub>3</sub>) δ 177.28, 155.65, 137.90, 115.19, 80.28, 53.27, 33.17, 31.78, 31.16, 28.31, 24.55. HRMS (DART) calcd. for C<sub>12</sub>H<sub>22</sub>NO<sub>4</sub><sup>+</sup> [M+H]<sup>+</sup> 244.1543, found 244.1545.

**General synthesis of 10:** Linear tetrapeptides were prepared by standard solid phase peptide synthesis (SPPS) on 2-chlorotriyl (2-CTC resin). Briefly, 2-CTC resin (~ 1 mmol/g) was swollen in CH<sub>2</sub>Cl<sub>2</sub> (10 mL/g), then Fmoc-(D)-Pip-OH (1 eq.) and DIPEA (1 eq.) was added, and the mixture was shaken for 1 h. The resin was filtered, then CH<sub>2</sub>Cl<sub>2</sub>/MeOH/DIPEA (10 mL/g, 17:2:1) was added, and the mixture was shaken for 15 min. The resin was then filtered and washed with DMF (3x, 10 mL/g). Deprotection was performed with 20% 4-Methylpiperidine/DMF (10 mL/g) for 5 min. The resin was then filtered and washed with DMF (3x, 10 mL/g). Coupling was performed with Fmoc-AA1-OH (2 eq.), PyAOP (2 eq.), DIPEA (6 eq.) in DMF (10 mL/g) for 5 min. The resin was then filtered and washed with DMF (3x, 10 mL/g). The coupling/deprotection/wash cycle as described was then performed for Fmoc-AA2-OH (2 eq.). The coupling as described was then performed for Boc-Uaa-OH (1 eq.), then the resin was filtered and washed with DMF (3x, 10 mL/g) followed by CH<sub>2</sub>Cl<sub>2</sub> (3x, 10 mL/g). The protected linear tetrapeptide was eluted with hexafluoroisopropanol/CH<sub>2</sub>Cl<sub>2</sub> (10 mL/g, 1:4), then the eluant was evaporated, redissolved in 4M HCl/dioxane (10 mL) and stirred for 30 min. The solution was then fully evaporated to give the crude linear tetrapeptide.

**Synthesis of 11:** To a solution of AOP (195 mg, 0.44 mmol) and DIPEA (383  $\mu$ L, 2.2 mmol) in DMF (200 mL) was added using a syringe pump over 60 min, a solution of **10** (130 mg, 0.22 mmol) in DMF (22 mL). The solution was further stirred for 30 min, then fully evaporated. The residue was purified by flash chromatography (1 - 5% MeOH/CH<sub>2</sub>Cl<sub>2</sub>) to give the cyclic peptide **11** as a solid (61 mg, 52%). <sup>1</sup>H NMR (500 MHz, CDCl<sub>3</sub>)  $\delta$  7.56 – 7.28 (m, 3H), 7.22 (q, *J* = 6.0 Hz, 5H), 7.10 (d, *J* = 7.0 Hz, 2H), 6.60 (d, *J* = 5.8 Hz, 1H), 6.49 (d, *J* = 10.1 Hz, 1H), 5.74 (ddt, *J* = 17.1, 10.5, 6.6 Hz, 1H), 5.35 (q, *J* = 8.3 Hz, 1H), 5.05 – 4.93 (m, 3H), 4.20 (q, *J* = 8.5 Hz, 1H), 3.94 (d, *J* = 13.3 Hz, 1H), 3.76 – 3.61 (m, 2H), 3.22 (ddd, *J* = 18.9, 13.7, 6.8 Hz, 2H), 3.12 – 2.94 (m, 3H), 2.09 – 1.95 (m, 4H), 1.84 – 1.69 (m, 2H), 1.60 – 1.48 (m, 3H), 1.37 – 1.26 (m, 3H). <sup>13</sup>C NMR (126 MHz, CDCl<sub>3</sub>)  $\delta$  175.83, 173.62, 173.42, 171.42, 137.88, 136.99, 129.10, 128.89, 128.57, 128.56, 126.92, 126.72, 115.15, 62.81, 53.67, 50.93, 49.96, 43.94, 36.59, 35.21, 33.57, 33.25, 29.72, 28.76, 25.38, 25.12, 24.74, 23.98, 19.28. HRMS (DART) calcd. for C<sub>31</sub>H<sub>39</sub>N<sub>4</sub>O<sub>4</sub><sup>+</sup> [M+H]<sup>+</sup> 531.2966, found 531.2968.

**General synthesis of 12:** To a solution of **11** (1 eq.) and **6a-c** (4 eq.) [or **S2-4** (4 eq.)] in dichloroethane (0.05 M), was added Hoveyda-Grubbs 2<sup>nd</sup> generation catalyst (20% w/w). The mixture was briefly flushed with nitrogen, then stirred at 50 °C overnight. Flash chromatography (0 – 60% ethyl acetate/hexane) afforded the metathesized products, which were directly dissolved in ethyl acetate (0.05 M). Dry 5% Pd/C (20% w/w) was then added, and the solution was hydrogenated at 1 atm for 2 h. The mixture was filtered through a plug of silica gel, washing with ethyl acetate (20 mL/mol), then the combined organic phase was evaporated to afford **12**.

**TD036:** 10 mg, 32%. <sup>1</sup>H NMR (500 MHz, CDCl<sub>3</sub>)  $\delta$  7.55 – 7.05 (m, 10H), 6.55 – 6.22 (m, 2H), 5.38 (dt, *J* = 9.9, 7.7 Hz, 1H), 5.04 (dd, *J* = 6.2, 2.6 Hz, 1H), 4.26 – 4.14 (m, 1H), 4.03 – 3.88 (m, 1H), 3.78 (ddt, *J* = 16.6, 11.5, 5.1 Hz, 1H), 3.71 – 3.61 (m, 1H), 3.38 – 2.93 (m, 4H), 2.87 (s, 1H), 2.66 – 2.47 (m, 1H), 2.38 (dddd, *J* = 16.7, 8.3, 6.0, 1.9 Hz, 1H), 2.32 – 1.89 (m, 4H), 1.83 – 0.99 (m, 30H), 0.90 (td, *J* = 7.0, 2.0 Hz, 3H). <sup>13</sup>C NMR (126 MHz, CDCl<sub>3</sub>)  $\delta$  209.56, 175.70, 173.61, 173.34, 171.39, 136.98, 136.96, 129.10, 128.88, 128.57, 126.97, 126.71, 81.31, 62.91, 62.78, 53.60, 50.98, 50.94, 49.97, 43.97, 36.77, 36.60, 35.71, 35.66, 35.25, 31.91, 31.89, 30.51, 29.76, 29.71, 29.69, 29.67, 29.58, 29.55, 29.52, 29.43, 29.37, 29.32, 29.30, 29.14, 29.00, 28.70, 25.29, 25.10, 24.73, 23.99, 23.17, 23.08, 22.69, 22.27, 19.24, 14.12. HRMS (DART) calcd. for C<sub>44</sub>H<sub>63</sub>N<sub>4</sub>O<sub>6</sub><sup>+</sup> [M+H]<sup>+</sup> 743.4742, found 743.4744.

**TD034:** 20 mg, 62%. <sup>1</sup>H NMR (500 MHz, CDCl<sub>3</sub>)  $\delta$  7.44 (d, *J* = 10.3 Hz, 1H), 7.29 (t, *J* = 7.4 Hz, 2H), 7.23 (dd, *J* = 10.2, 7.2 Hz, 5H), 7.13 – 7.08 (m, 2H), 6.41 (d, *J* = 10.2 Hz, 1H), 6.29 (d, *J* = 6.0 Hz, 1H), 5.36 (q, *J* = 8.4 Hz, 1H), 5.01 (d, *J* = 5.8 Hz, 1H), 4.15 (q, *J* = 8.5 Hz, 1H), 3.95 (d, *J* = 13.3 Hz, 1H), 3.76 – 3.61 (m, 2H), 3.30 – 3.18 (m, 3H), 3.11 – 2.97 (m, 3H), 2.41 (dt, *J* = 17.3, 7.2 Hz, 1H), 2.24 (dt, *J* = 17.3, 7.4 Hz, 1H), 2.09 (d, *J* = 13.7 Hz, 1H), 2.02 – 1.93 (m, 1H), 1.84 – 1.04 (m, 33H), 0.88 (t, *J* = 6.8 Hz, 3H). <sup>13</sup>C NMR (126 MHz, CDCl<sub>3</sub>)  $\delta$  207.77, 175.73, 173.62, 173.34, 171.41, 136.97, 136.95, 129.10, 128.88, 128.58, 128.57, 126.99, 126.72, 62.86, 59.70, 58.41, 53.51, 50.97, 49.99, 43.97, 36.80, 36.57, 35.22, 31.92, 31.87,



29.72, 29.63, 29.62, 29.55, 29.52, 29.47, 29.35, 29.30, 28.94, 28.65, 25.81, 25.22, 25.09, 23.99, 22.79, 22.70, 19.23, 14.14. HRMS (DART) calcd. for C<sub>45</sub>H<sub>65</sub>N<sub>4</sub>O<sub>6</sub><sup>+</sup> [M+H]<sup>+</sup> 757.4899, found 757.4898.

**TD034-R:** 20 mg, 62%. <sup>1</sup>H NMR (500 MHz, CDCl<sub>3</sub>) δ 7.47 (dd, *J* = 10.6, 6.4 Hz, 1H), 7.29 – 7.08 (m, 9H), 6.52 – 6.37 (m, 2H), 5.35 (dt, *J* = 10.2, 7.6 Hz, 1H), 5.02 (dd, *J* = 6.3, 2.3 Hz, 1H), 4.24 – 4.13 (m, 1H), 3.94 (dt, *J* = 13.4, 3.6 Hz, 1H), 3.82 – 3.70 (m, 1H), 3.70 – 3.57 (m, 1H), 3.31 – 3.19 (m, 2H), 3.03 (dddd, *J* = 24.2, 16.0, 13.5, 5.0 Hz, 2H), 2.48 – 2.33 (m, 1H), 2.31 – 2.18 (m, 1H), 2.08 (dt, *J* = 13.3, 4.2 Hz, 1H), 2.02 – 1.92 (m, 1H), 1.83 – 1.42 (m, 11H), 1.40 – 1.19 (m, 24H), 0.89 (d, *J* = 6.7 Hz, 3H). <sup>13</sup>C NMR (126 MHz, CDCl<sub>3</sub>) δ 207.76, 175.67, 173.60, 173.34, 136.95, 129.10, 128.88, 128.58, 128.56, 126.97, 126.72, 62.69, 59.70, 58.42, 53.61, 50.97, 49.95, 43.98, 36.82, 36.76, 36.60, 35.25, 31.92, 31.87, 29.72, 29.63, 29.62, 29.52, 29.47, 29.37, 29.35, 29.30, 28.98, 28.65, 25.81, 25.23, 25.11, 23.99, 22.79, 22.70, 19.25, 14.14. HRMS (DART) calcd. for C<sub>45</sub>H<sub>65</sub>N<sub>4</sub>O<sub>6</sub><sup>+</sup> [M+H]<sup>+</sup> 757.4899, found 757.4900.

**TD037:** 16 mg, 40%. <sup>1</sup>H NMR (500 MHz, CDCl<sub>3</sub>) δ 7.48 (d, *J* = 10.2 Hz, 1H), 7.26 (ddt, *J* = 16.1, 12.2, 6.4 Hz, 7H), 7.10 (d, *J* = 7.2 Hz, 2H), 6.49 (dd, *J* = 34.5, 8.1 Hz, 2H), 5.35 (q, *J* = 8.5 Hz, 1H), 5.02 (d, *J* = 5.8 Hz, 1H), 4.17 (q, *J* = 8.5 Hz, 1H), 3.94 (d, *J* = 13.3 Hz, 1H), 3.74 (dt, *J* = 11.8, 6.2 Hz, 1H), 3.64 (t, *J* = 12.1 Hz, 1H), 3.30 – 3.19 (m, 2H), 3.10 – 2.90 (m, 3H), 2.39 (ddt, *J* = 22.6, 15.1, 7.1 Hz, 1H), 2.25 (dd, *J* = 16.3, 8.3 Hz, 1H), 2.06 (dd, *J* = 16.1, 11.3 Hz, 1H), 1.96 (d, *J* = 13.6 Hz, 1H), 1.86 – 1.73 (m, 2H), 1.73 – 1.36 (m, 10H), 1.36 – 1.10 (m, 14H), 0.88 (t, *J* = 6.6 Hz, 3H). <sup>13</sup>C NMR (126 MHz, CDCl<sub>3</sub>) δ 207.79, 175.76, 173.62, 173.38, 171.45, 136.96, 129.10, 128.89, 128.58, 128.56, 126.97, 126.73, 62.72, 59.69, 58.43, 53.60, 50.93, 49.95, 43.96, 36.84, 36.59, 35.23, 31.87, 31.71, 29.45, 29.30, 29.24, 29.13, 29.01, 28.66, 25.80, 25.23, 25.10, 23.98, 22.79, 22.69, 22.63, 19.26, 14.10. HRMS (DART) calcd. for C<sub>41</sub>H<sub>57</sub>N<sub>4</sub>O<sub>6</sub><sup>+</sup> [M+H]<sup>+</sup> 701.4273, found 701.4270.

**TD038:** 18 mg, 38%. <sup>1</sup>H NMR (500 MHz, CDCl<sub>3</sub>) δ 7.48 (d, *J* = 10.3 Hz, 1H), 7.29 – 7.17 (m, 7H), 7.10 (d, *J* = 7.1 Hz, 2H), 6.48 (dd, *J* = 33.9, 8.1 Hz, 2H), 5.35 (q, *J* = 8.4 Hz, 1H), 5.02 (d, *J* = 5.9 Hz, 1H), 4.17 (q, *J* = 8.5 Hz, 1H), 3.94 (d, *J* = 13.3 Hz, 1H), 3.75 (dt, *J* = 11.9, 6.0 Hz, 1H), 3.63 (t, *J* = 12.1 Hz, 1H), 3.31 – 3.19 (m, 2H), 3.11 – 2.93 (m, 3H), 2.39 (s, 1H), 2.24 (dt, *J* = 17.6, 7.3 Hz, 1H), 2.07 (d, *J* = 13.3 Hz, 1H), 1.97 (d, *J* = 13.8 Hz, 1H), 1.79 – 1.19 (m, 41H), 0.88 (td, *J* = 6.9, 2.2 Hz, 4H). <sup>13</sup>C NMR (126 MHz, CDCl<sub>3</sub>) δ 207.79, 175.71, 173.61, 173.37, 171.45, 136.96, 129.10, 128.89, 128.58, 128.56, 126.97, 126.73, 62.66, 59.69, 58.43, 53.61, 50.94, 49.94, 43.97, 36.83, 36.60, 35.25, 31.94, 31.88, 29.71, 29.70, 29.67, 29.64, 29.53, 29.48, 29.38, 29.31, 29.01, 28.65, 25.81, 25.24, 25.11, 23.98, 22.79, 22.71, 19.26, 14.15. HRMS (DART) calcd. for C<sub>49</sub>H<sub>73</sub>N<sub>4</sub>O<sub>6</sub><sup>+</sup> [M+H]<sup>+</sup> 813.5525, found 813.5519.

## REFERENCES

- (1) Son, S. I.; Cao, J.; Zhu, C.-L.; Miller, S. P.; Lin, H. Activity-Guided Design of HDAC11-Specific Inhibitors. *ACS Chemical Biology* **2019**. <https://doi.org/10.1021/acscchembio.9b00292>.
- (2) Gu, X.; Ndungu, J. M.; Qiu, W.; Ying, J.; Carducci, M. D.; Wooden, H.; Hruby, V. J. Large Scale Enantiomeric Synthesis, Purification, and Characterization of ω-Unsaturated Amino Acids via a Gly-Ni(II)-BPB-Complex. *Tetrahedron* **2004**, *60* (37), 8233–8243. <https://doi.org/10.1016/j.tet.2004.06.087>.

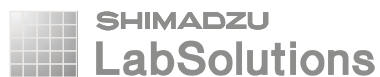

# Analysis Report

## TD036

### <Sample Information>

|                  |                           |              |                        |
|------------------|---------------------------|--------------|------------------------|
| Sample Name      | : TD036_purity            | Sample Type  | : Unknown              |
| Sample ID        | :                         | Acquired by  | : System Administrator |
| Data Filename    | : TD036_purity_1.lcd      | Processed by | : System Administrator |
| Method Filename  | : 0-100%_15min_purity.lcm |              |                        |
| Batch Filename   | : postrun_20221220.lcb    |              |                        |
| Vial #           | : 1-B6                    |              |                        |
| Injection Volume | : 20 uL                   |              |                        |
| Date Acquired    | : 12/6/2022 1:07:28 PM    |              |                        |
| Date Processed   | : 12/20/2022 8:59:25 PM   |              |                        |

### <Chromatogram>

mV

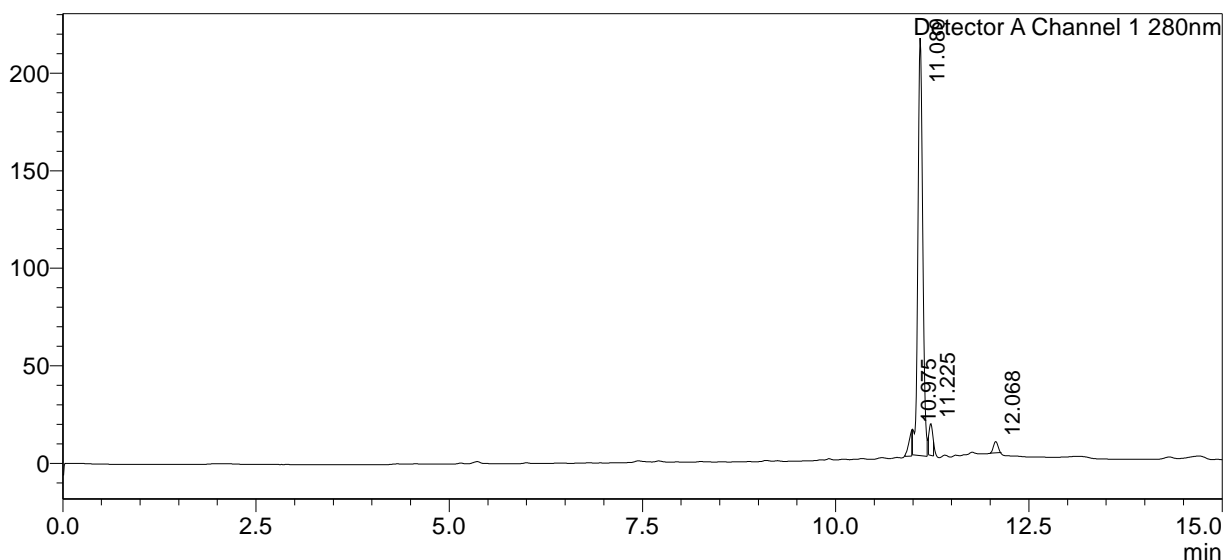

### <Peak Table>

Detector A Channel 1 280nm

| Peak# | Ret. Time | Area    | Area%   |
|-------|-----------|---------|---------|
| 1     | 10.975    | 36385   | 3.469   |
| 2     | 11.089    | 937335  | 89.375  |
| 3     | 11.225    | 51404   | 4.901   |
| 4     | 12.068    | 23642   | 2.254   |
| Total |           | 1048765 | 100.000 |

## TD034

### <Sample Information>

|                  |                           |              |                        |
|------------------|---------------------------|--------------|------------------------|
| Sample Name      | : TD034_purity_1          | Sample Type  | : Unknown              |
| Sample ID        | :                         | Acquired by  | : System Administrator |
| Data Filename    | : TD034_purity_1.lcd      | Processed by | : System Administrator |
| Method Filename  | : 0-100%_15min_purity.lcm |              |                        |
| Batch Filename   | : postrun_20221220.lcb    |              |                        |
| Vial #           | : 1-B7                    |              |                        |
| Injection Volume | : 20 uL                   |              |                        |
| Date Acquired    | : 12/6/2022 1:30:48 PM    |              |                        |
| Date Processed   | : 12/20/2022 9:02:49 PM   |              |                        |

### <Chromatogram>

mV

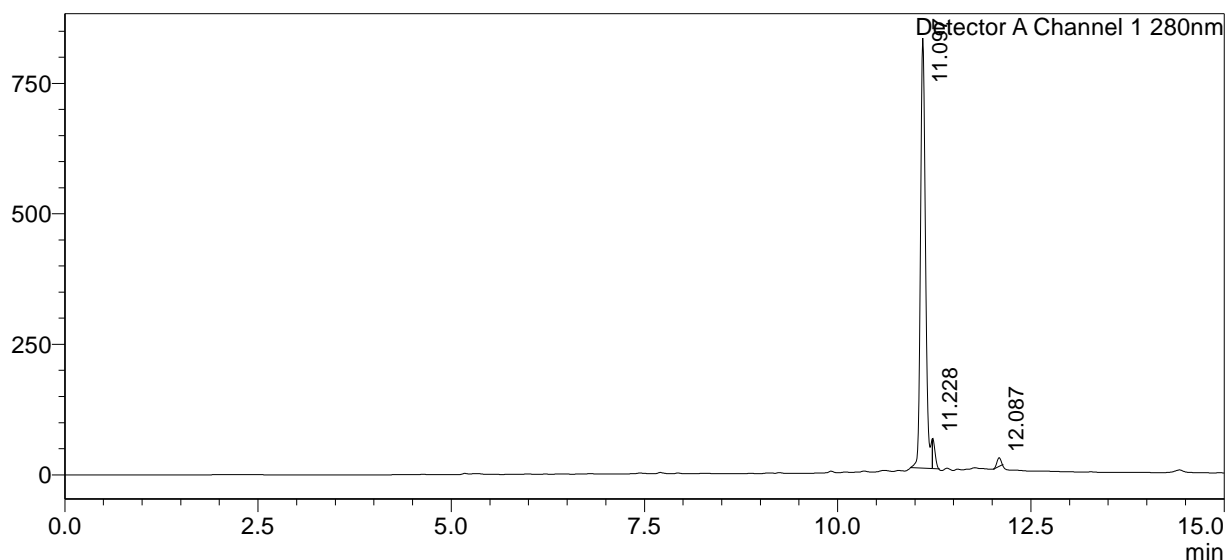

### <Peak Table>

Detector A Channel 1 280nm

| Peak# | Ret. Time | Area    | Area%   |
|-------|-----------|---------|---------|
| 1     | 11.097    | 3755774 | 95.357  |
| 2     | 11.228    | 123016  | 3.123   |
| 3     | 12.087    | 59876   | 1.520   |
| Total |           | 3938665 | 100.000 |

## TD034-R

### <Sample Information>

|                  |                           |              |                        |
|------------------|---------------------------|--------------|------------------------|
| Sample Name      | : TD034(R)_purity_1       | Sample Type  | : Unknown              |
| Sample ID        | :                         | Acquired by  | : System Administrator |
| Data Filename    | : TD034(R)_purity_1.lcd   | Processed by | : System Administrator |
| Method Filename  | : 0-100%_15min_purity.lcm |              |                        |
| Batch Filename   | : postrun_20221220.lcb    |              |                        |
| Vial #           | : 1-C1                    |              |                        |
| Injection Volume | : 50 uL                   |              |                        |
| Date Acquired    | : 12/9/2022 3:19:24 PM    |              |                        |
| Date Processed   | : 12/20/2022 9:08:40 PM   |              |                        |

### <Chromatogram>

mV

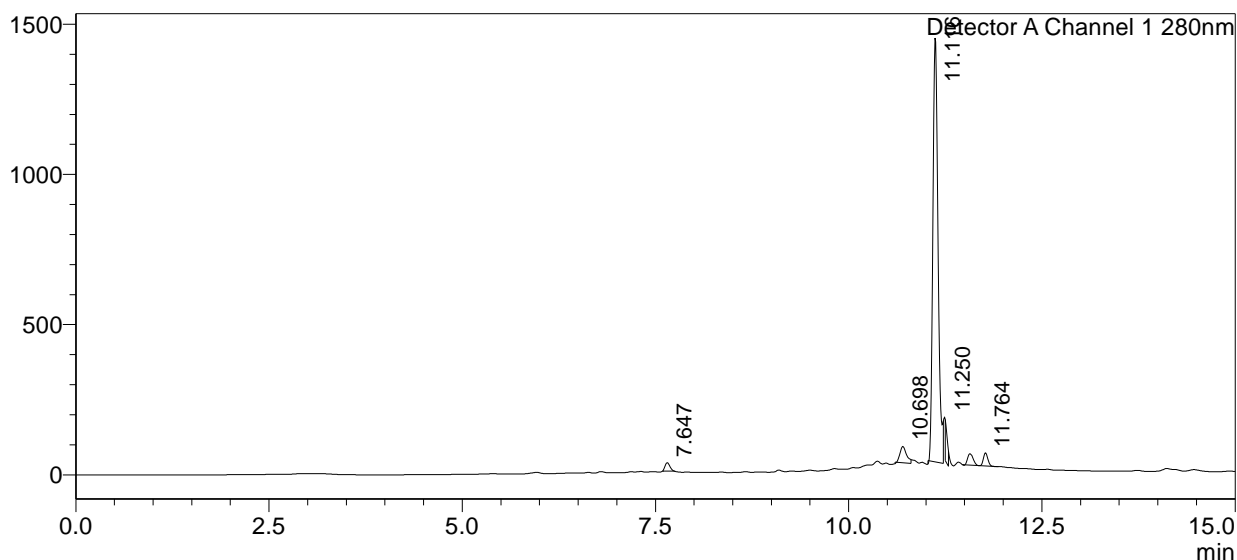

### <Peak Table>

Detector A Channel 1 280nm

| Peak# | Ret. Time | Area    | Area%   |
|-------|-----------|---------|---------|
| 1     | 7.647     | 121558  | 1.586   |
| 2     | 10.698    | 324012  | 4.227   |
| 3     | 11.116    | 6652898 | 86.803  |
| 4     | 11.250    | 209573  | 2.734   |
| 5     | 11.764    | 356353  | 4.649   |
| Total |           | 7664394 | 100.000 |

## TD037

### <Sample Information>

|                  |                           |              |                        |
|------------------|---------------------------|--------------|------------------------|
| Sample Name      | : TD037_purity_1          | Sample Type  | : Unknown              |
| Sample ID        | :                         | Acquired by  | : System Administrator |
| Data Filename    | : TD037_purity_1.lcd      | Processed by | : System Administrator |
| Method Filename  | : 0-100%_15min_purity.lcm |              |                        |
| Batch Filename   | : postrun_20221220.lcb    |              |                        |
| Vial #           | : 1-C2                    |              |                        |
| Injection Volume | : 50 uL                   |              |                        |
| Date Acquired    | : 12/9/2022 4:14:14 PM    |              |                        |
| Date Processed   | : 12/20/2022 9:07:15 PM   |              |                        |

### <Chromatogram>

mV

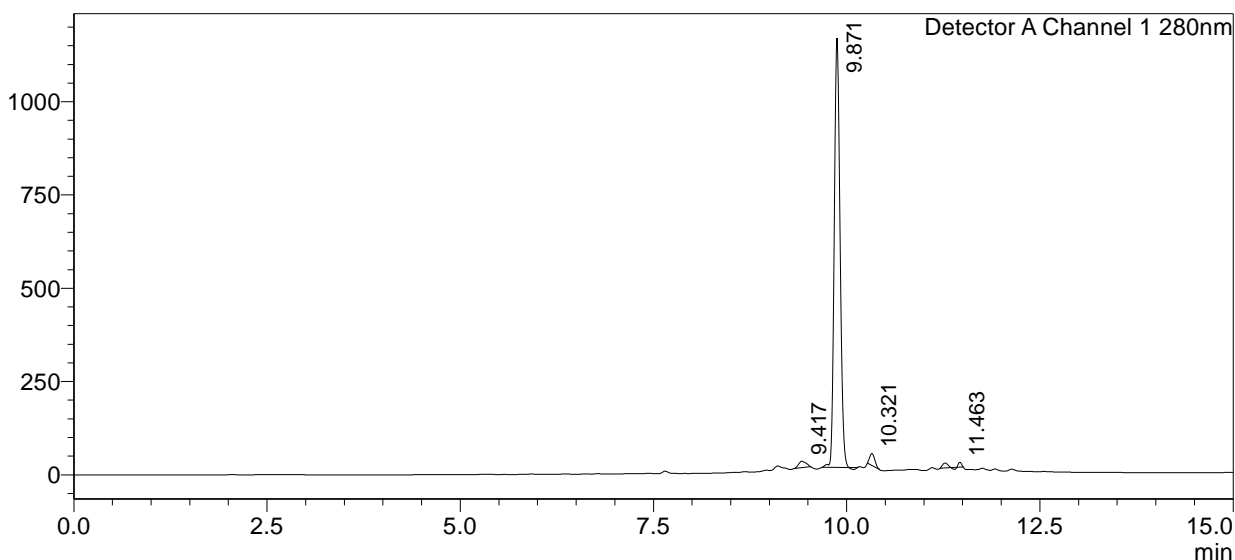

### <Peak Table>

Detector A Channel 1 280nm

| Peak# | Ret. Time | Area    | Area%   |
|-------|-----------|---------|---------|
| 1     | 9.417     | 122079  | 1.918   |
| 2     | 9.871     | 6007605 | 94.399  |
| 3     | 10.321    | 146245  | 2.298   |
| 4     | 11.463    | 88098   | 1.384   |
| Total |           | 6364027 | 100.000 |

## TD038

### <Sample Information>

|                  |                           |              |                        |
|------------------|---------------------------|--------------|------------------------|
| Sample Name      | : TD038_purity_1          | Sample Type  | : Unknown              |
| Sample ID        | :                         | Acquired by  | : System Administrator |
| Data Filename    | : TD038_purity_1.lcd      | Processed by | : System Administrator |
| Method Filename  | : 0-100%_15min_purity.lcm |              |                        |
| Batch Filename   | : postrun_20221220.lcb    |              |                        |
| Vial #           | : 1-C3                    |              |                        |
| Injection Volume | : 50 uL                   |              |                        |
| Date Acquired    | : 12/9/2022 4:31:07 PM    |              |                        |
| Date Processed   | : 12/20/2022 9:07:46 PM   |              |                        |

### <Chromatogram>

mV

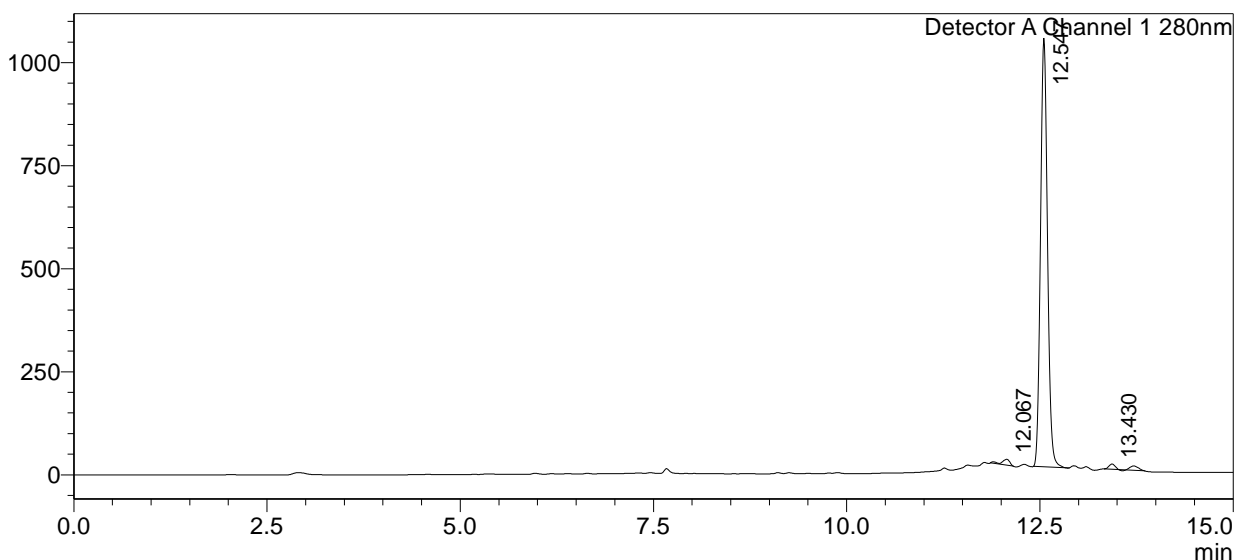

### <Peak Table>

Detector A Channel 1 280nm

| Peak# | Ret. Time | Area    | Area%   |
|-------|-----------|---------|---------|
| 1     | 12.067    | 98802   | 1.453   |
| 2     | 12.547    | 6559751 | 96.457  |
| 3     | 13.430    | 142177  | 2.091   |
| Total |           | 6800730 | 100.000 |

## Trapoxin A

### <Sample Information>

|                  |                           |              |                        |
|------------------|---------------------------|--------------|------------------------|
| Sample Name      | : TrapoxinA_purity_1      | Sample Type  | : Unknown              |
| Sample ID        | :                         | Acquired by  | : System Administrator |
| Data Filename    | : TrapoxinA_purity_1.lcd  | Processed by | : System Administrator |
| Method Filename  | : 0-100%_15min_purity.lcm |              |                        |
| Batch Filename   | : postrun_20221220.lcb    |              |                        |
| Vial #           | : 1-A9                    |              |                        |
| Injection Volume | : 40 uL                   |              |                        |
| Date Acquired    | : 12/20/2022 5:23:20 PM   |              |                        |
| Date Processed   | : 12/20/2022 9:27:39 PM   |              |                        |

### <Chromatogram>

mV

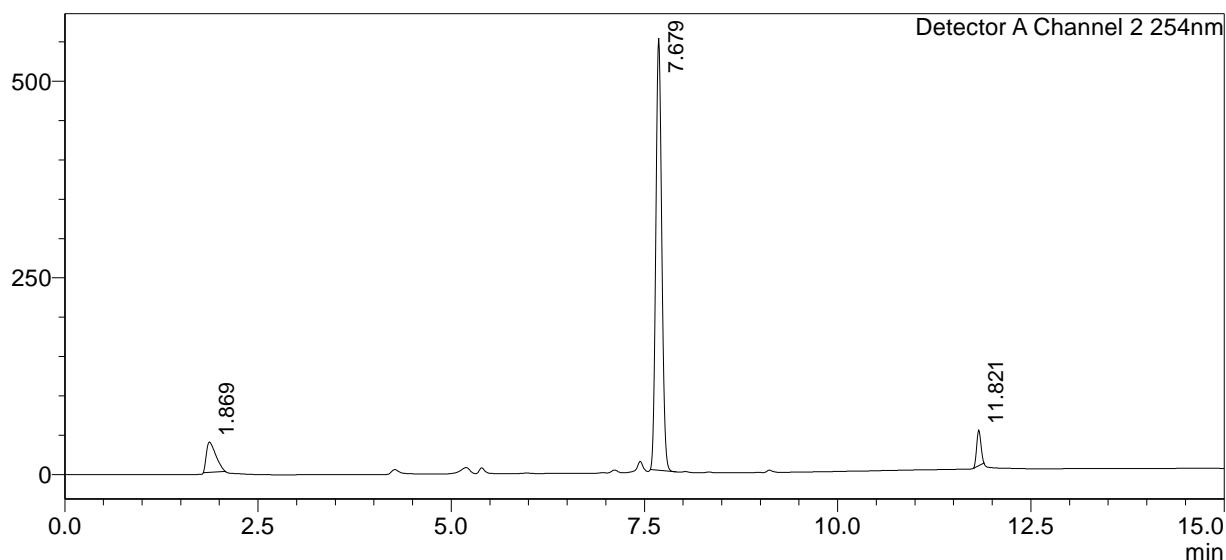

### <Peak Table>

Detector A Channel 2 254nm

| Peak# | Ret. Time | Area    | Area%   |
|-------|-----------|---------|---------|
| 1     | 1.869     | 328791  | 9.565   |
| 2     | 7.679     | 2935530 | 85.402  |
| 3     | 11.821    | 172980  | 5.032   |
| Total |           | 3437301 | 100.000 |

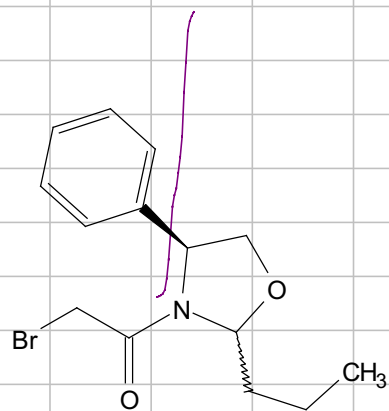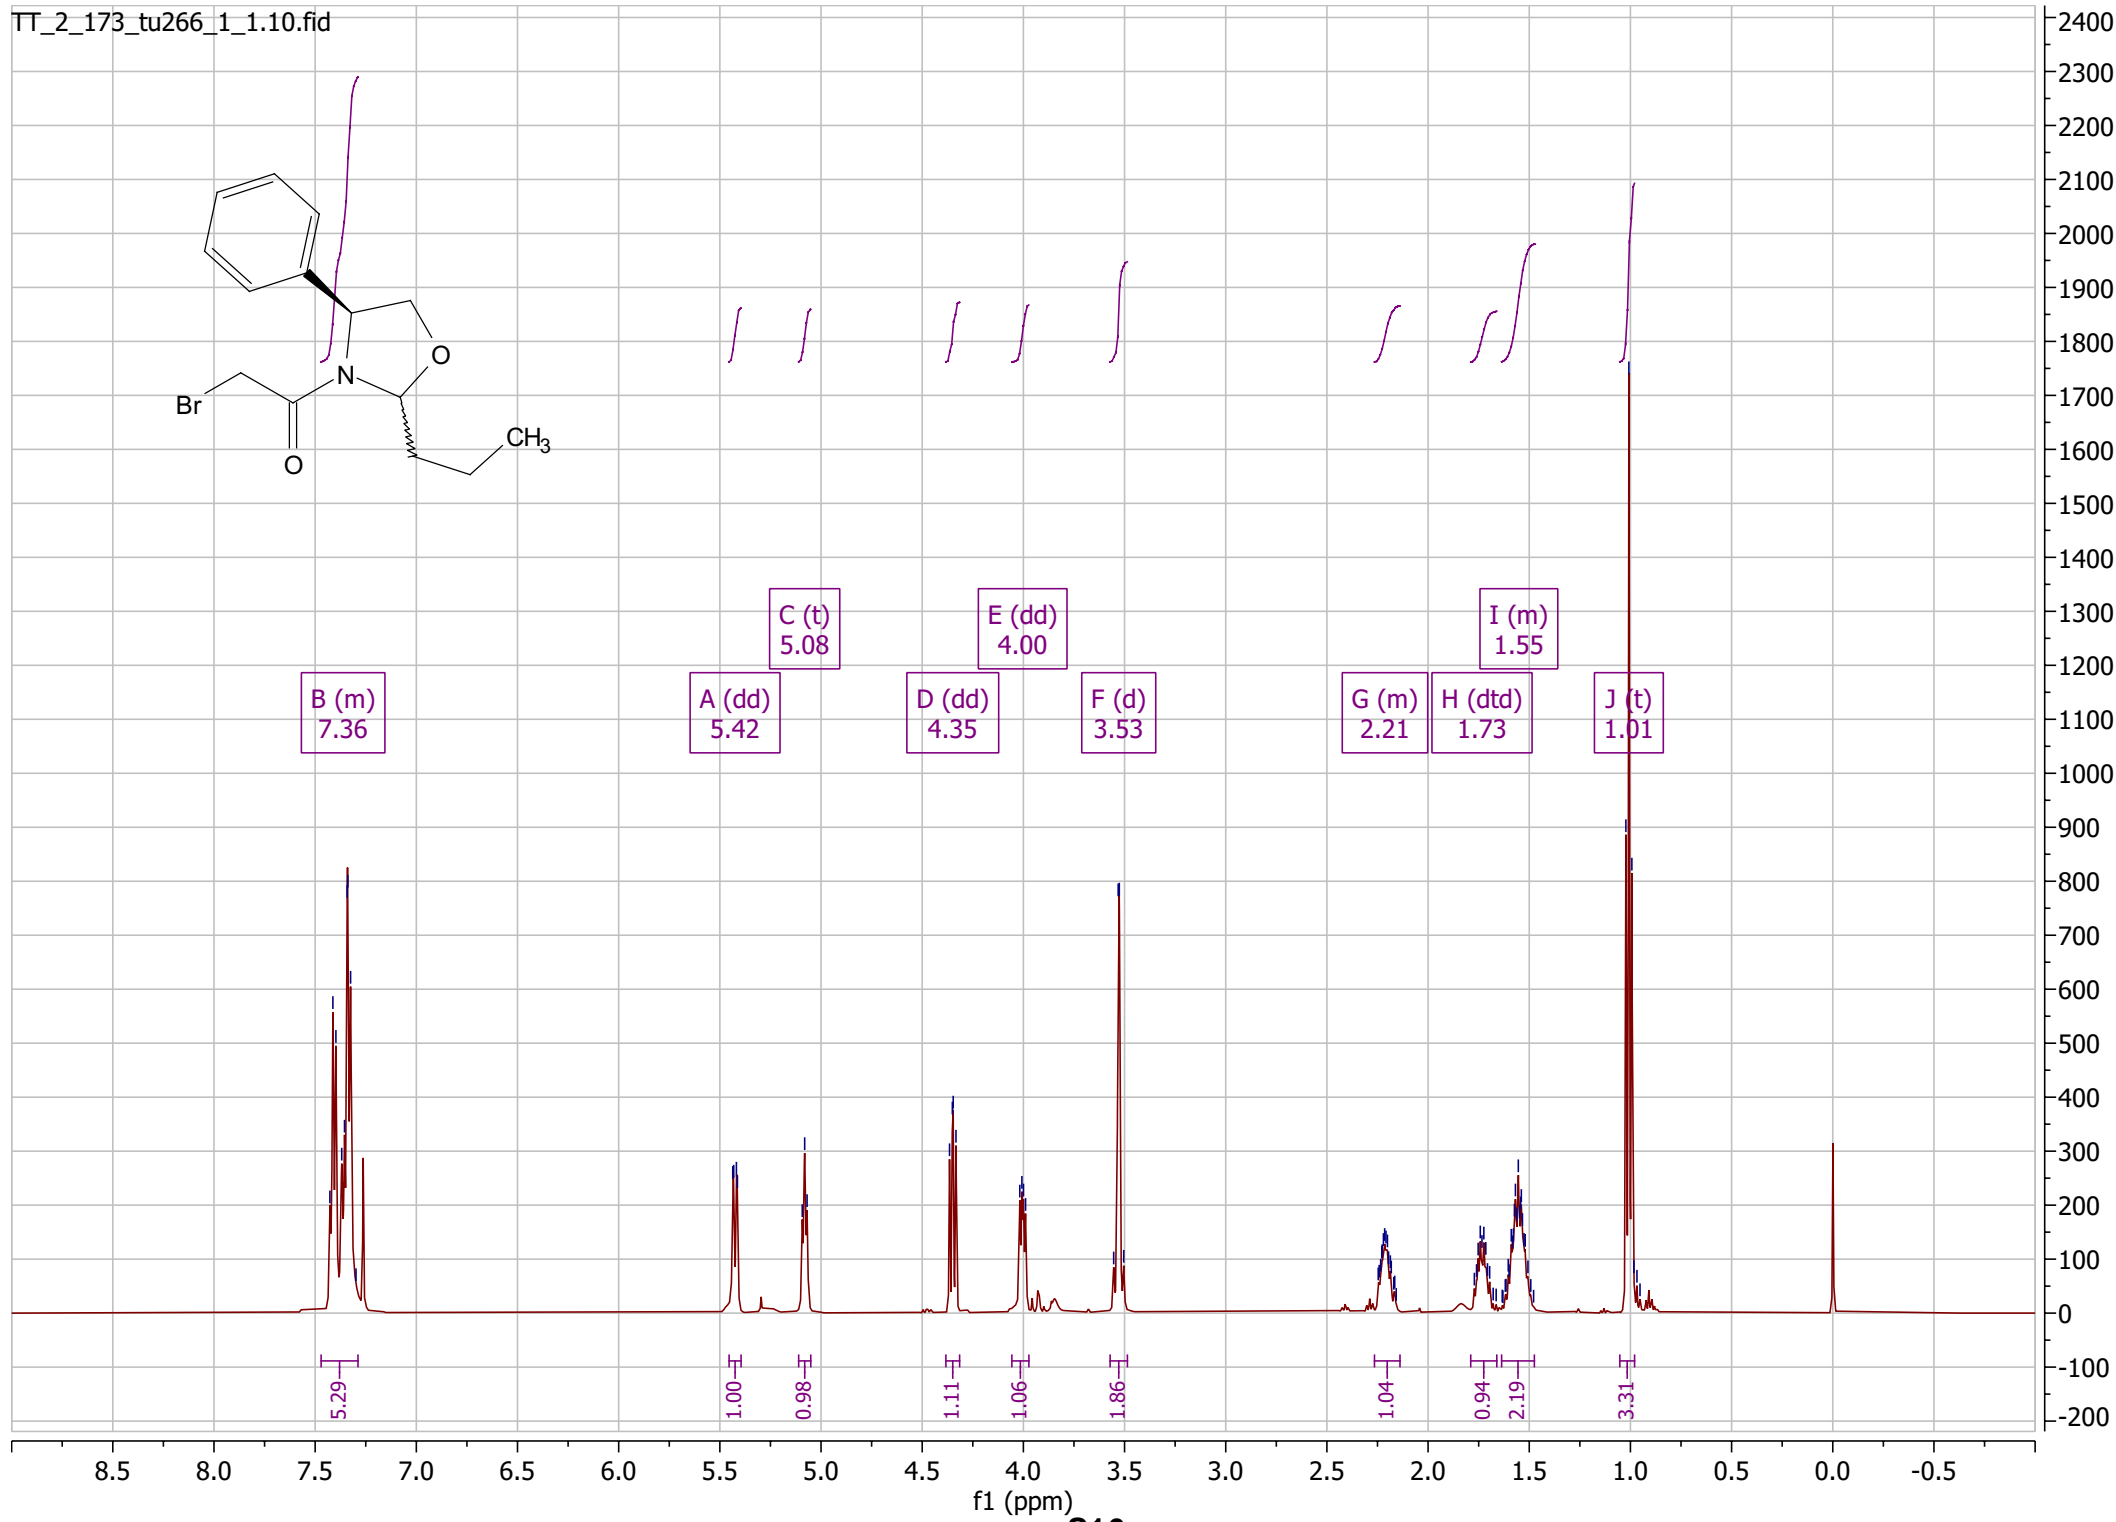



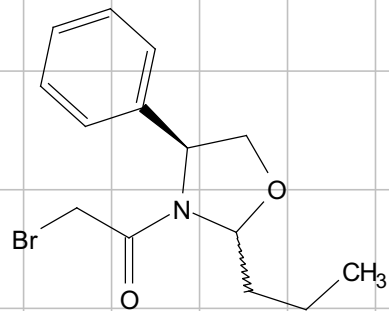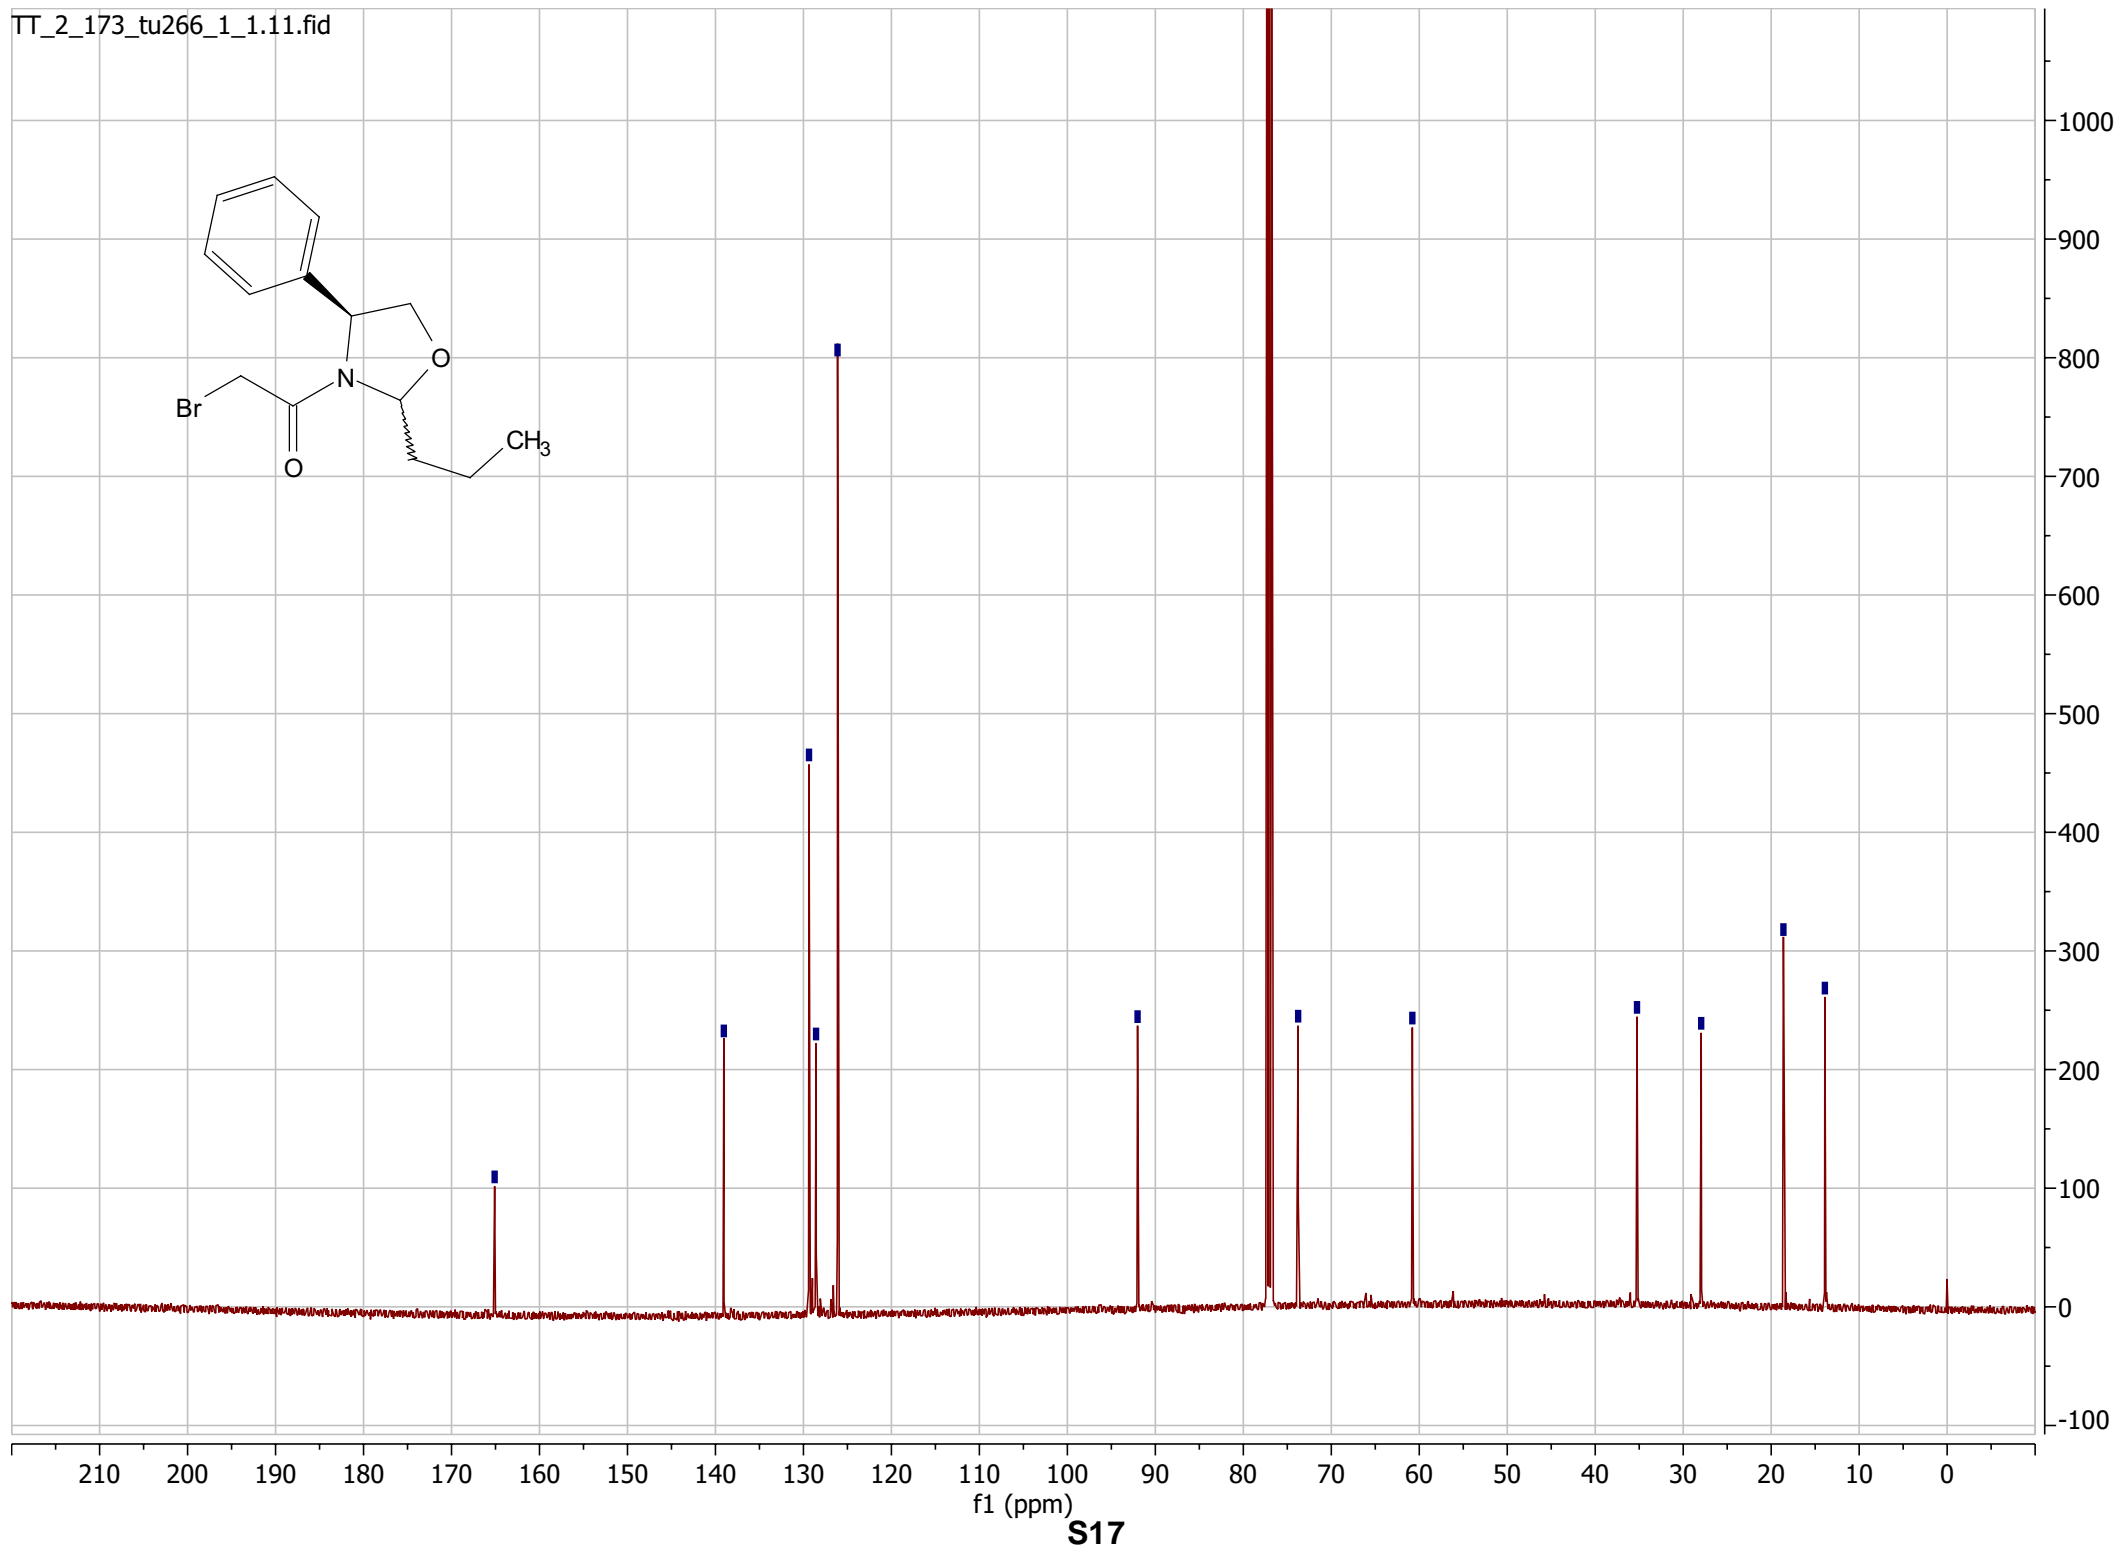

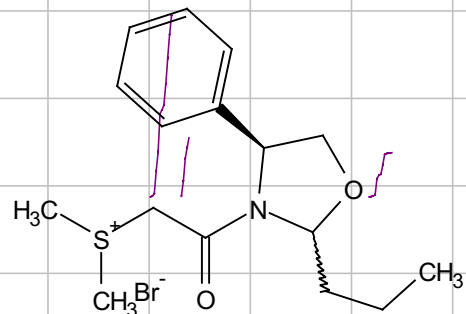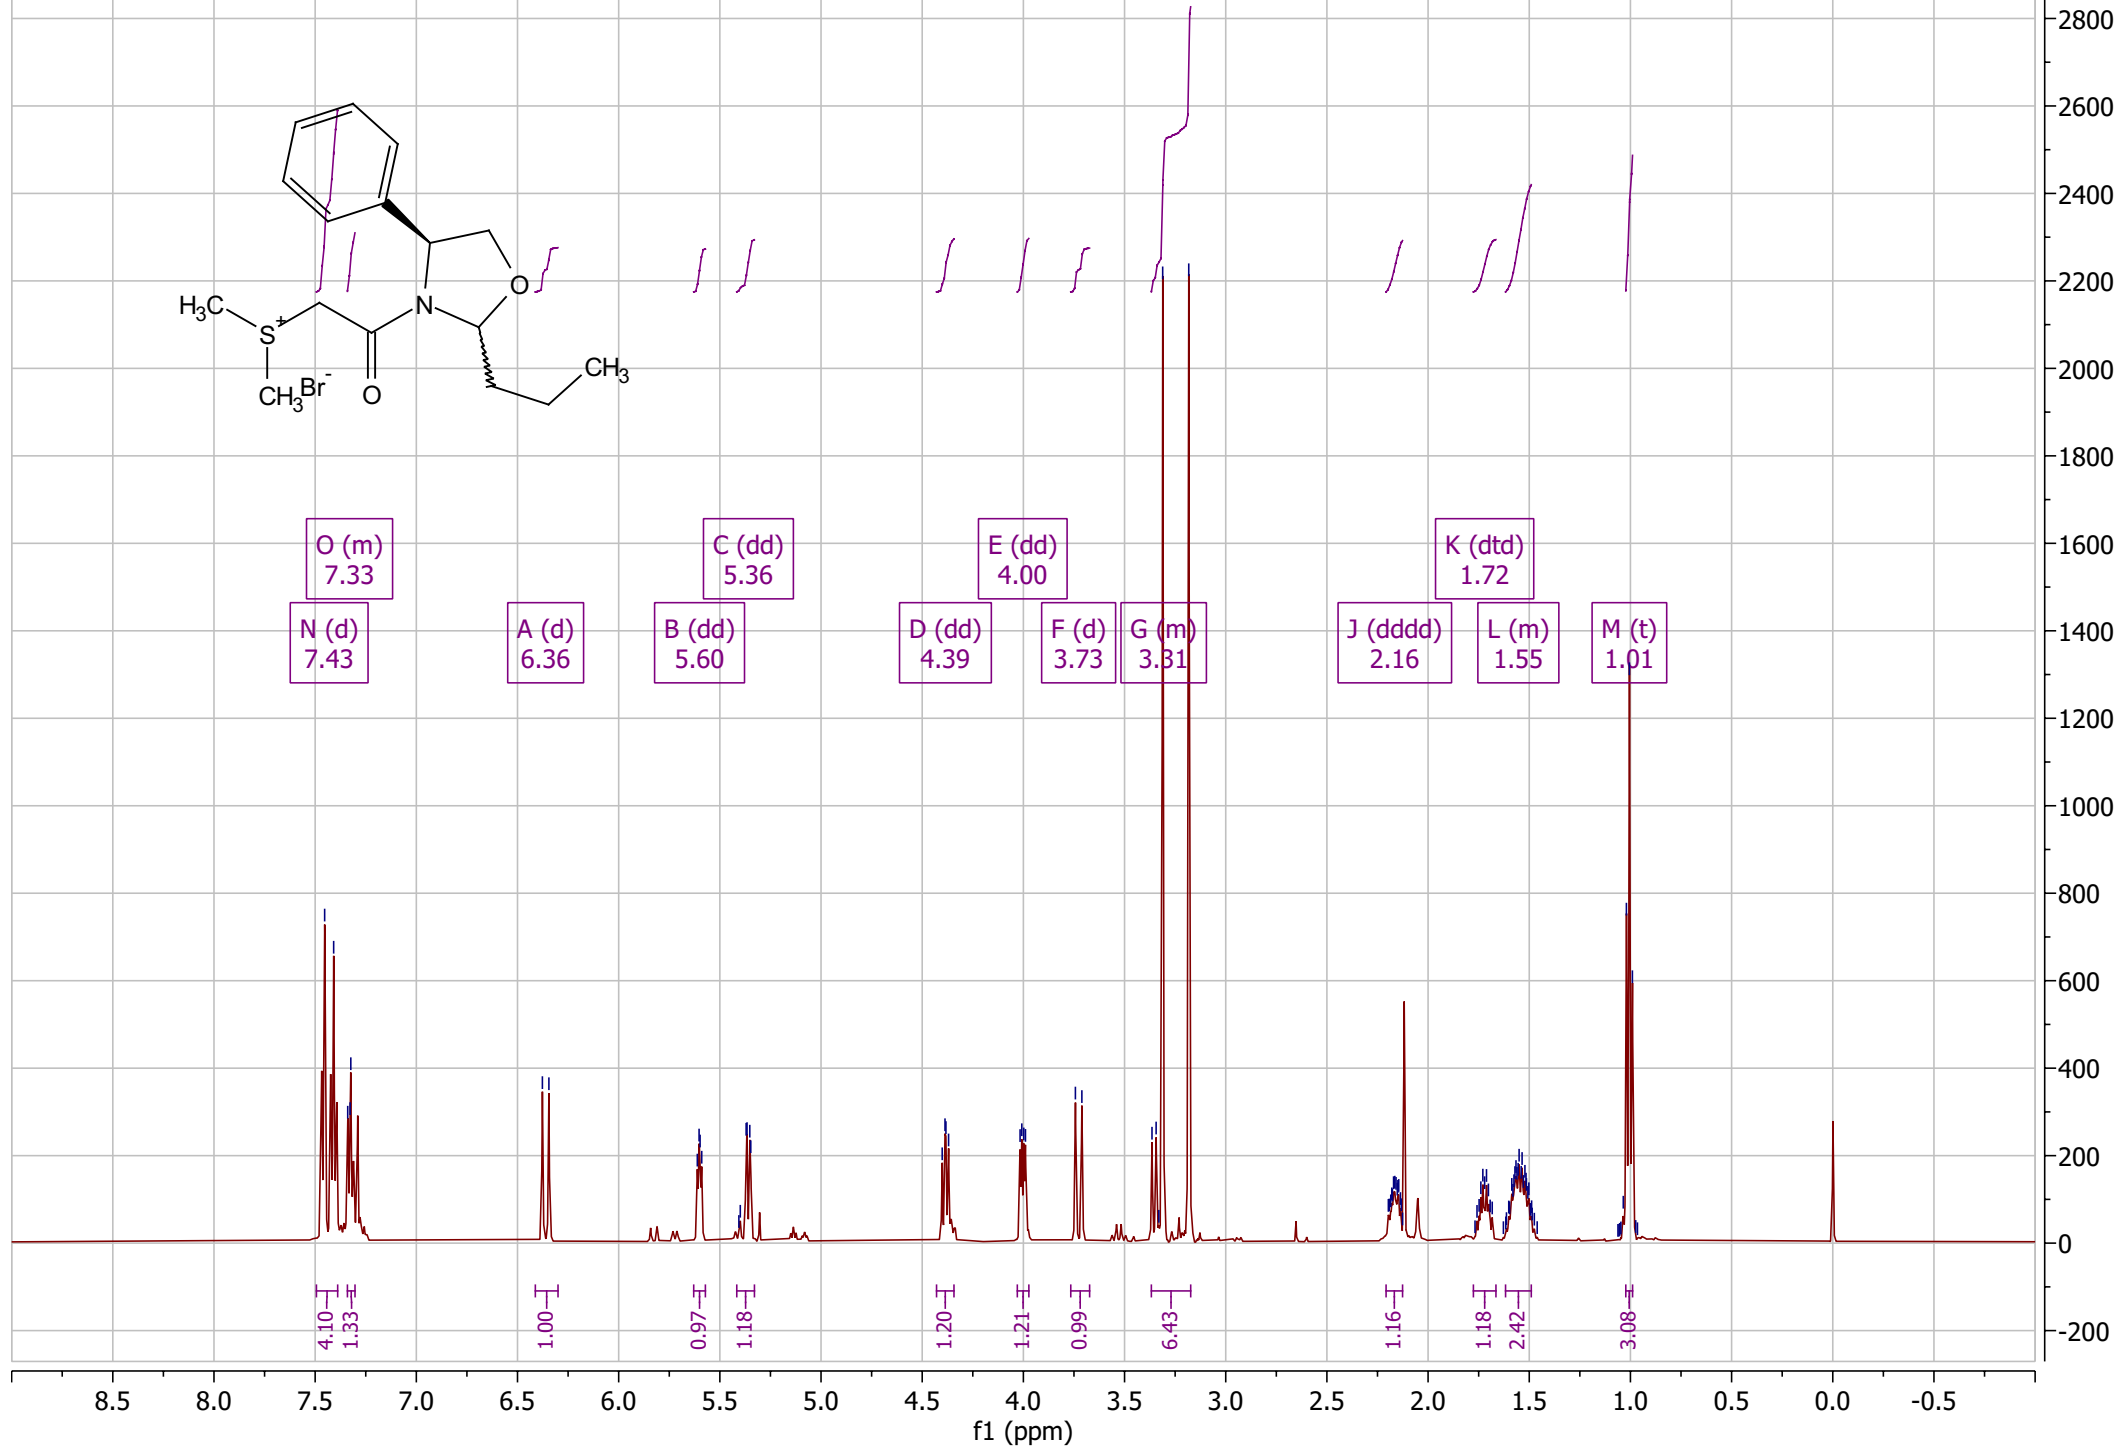

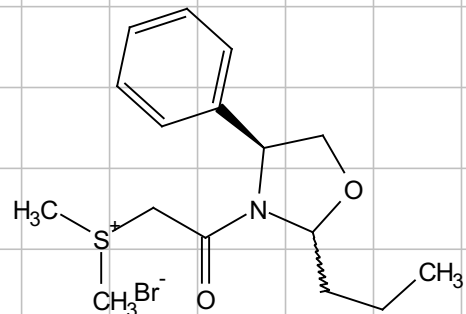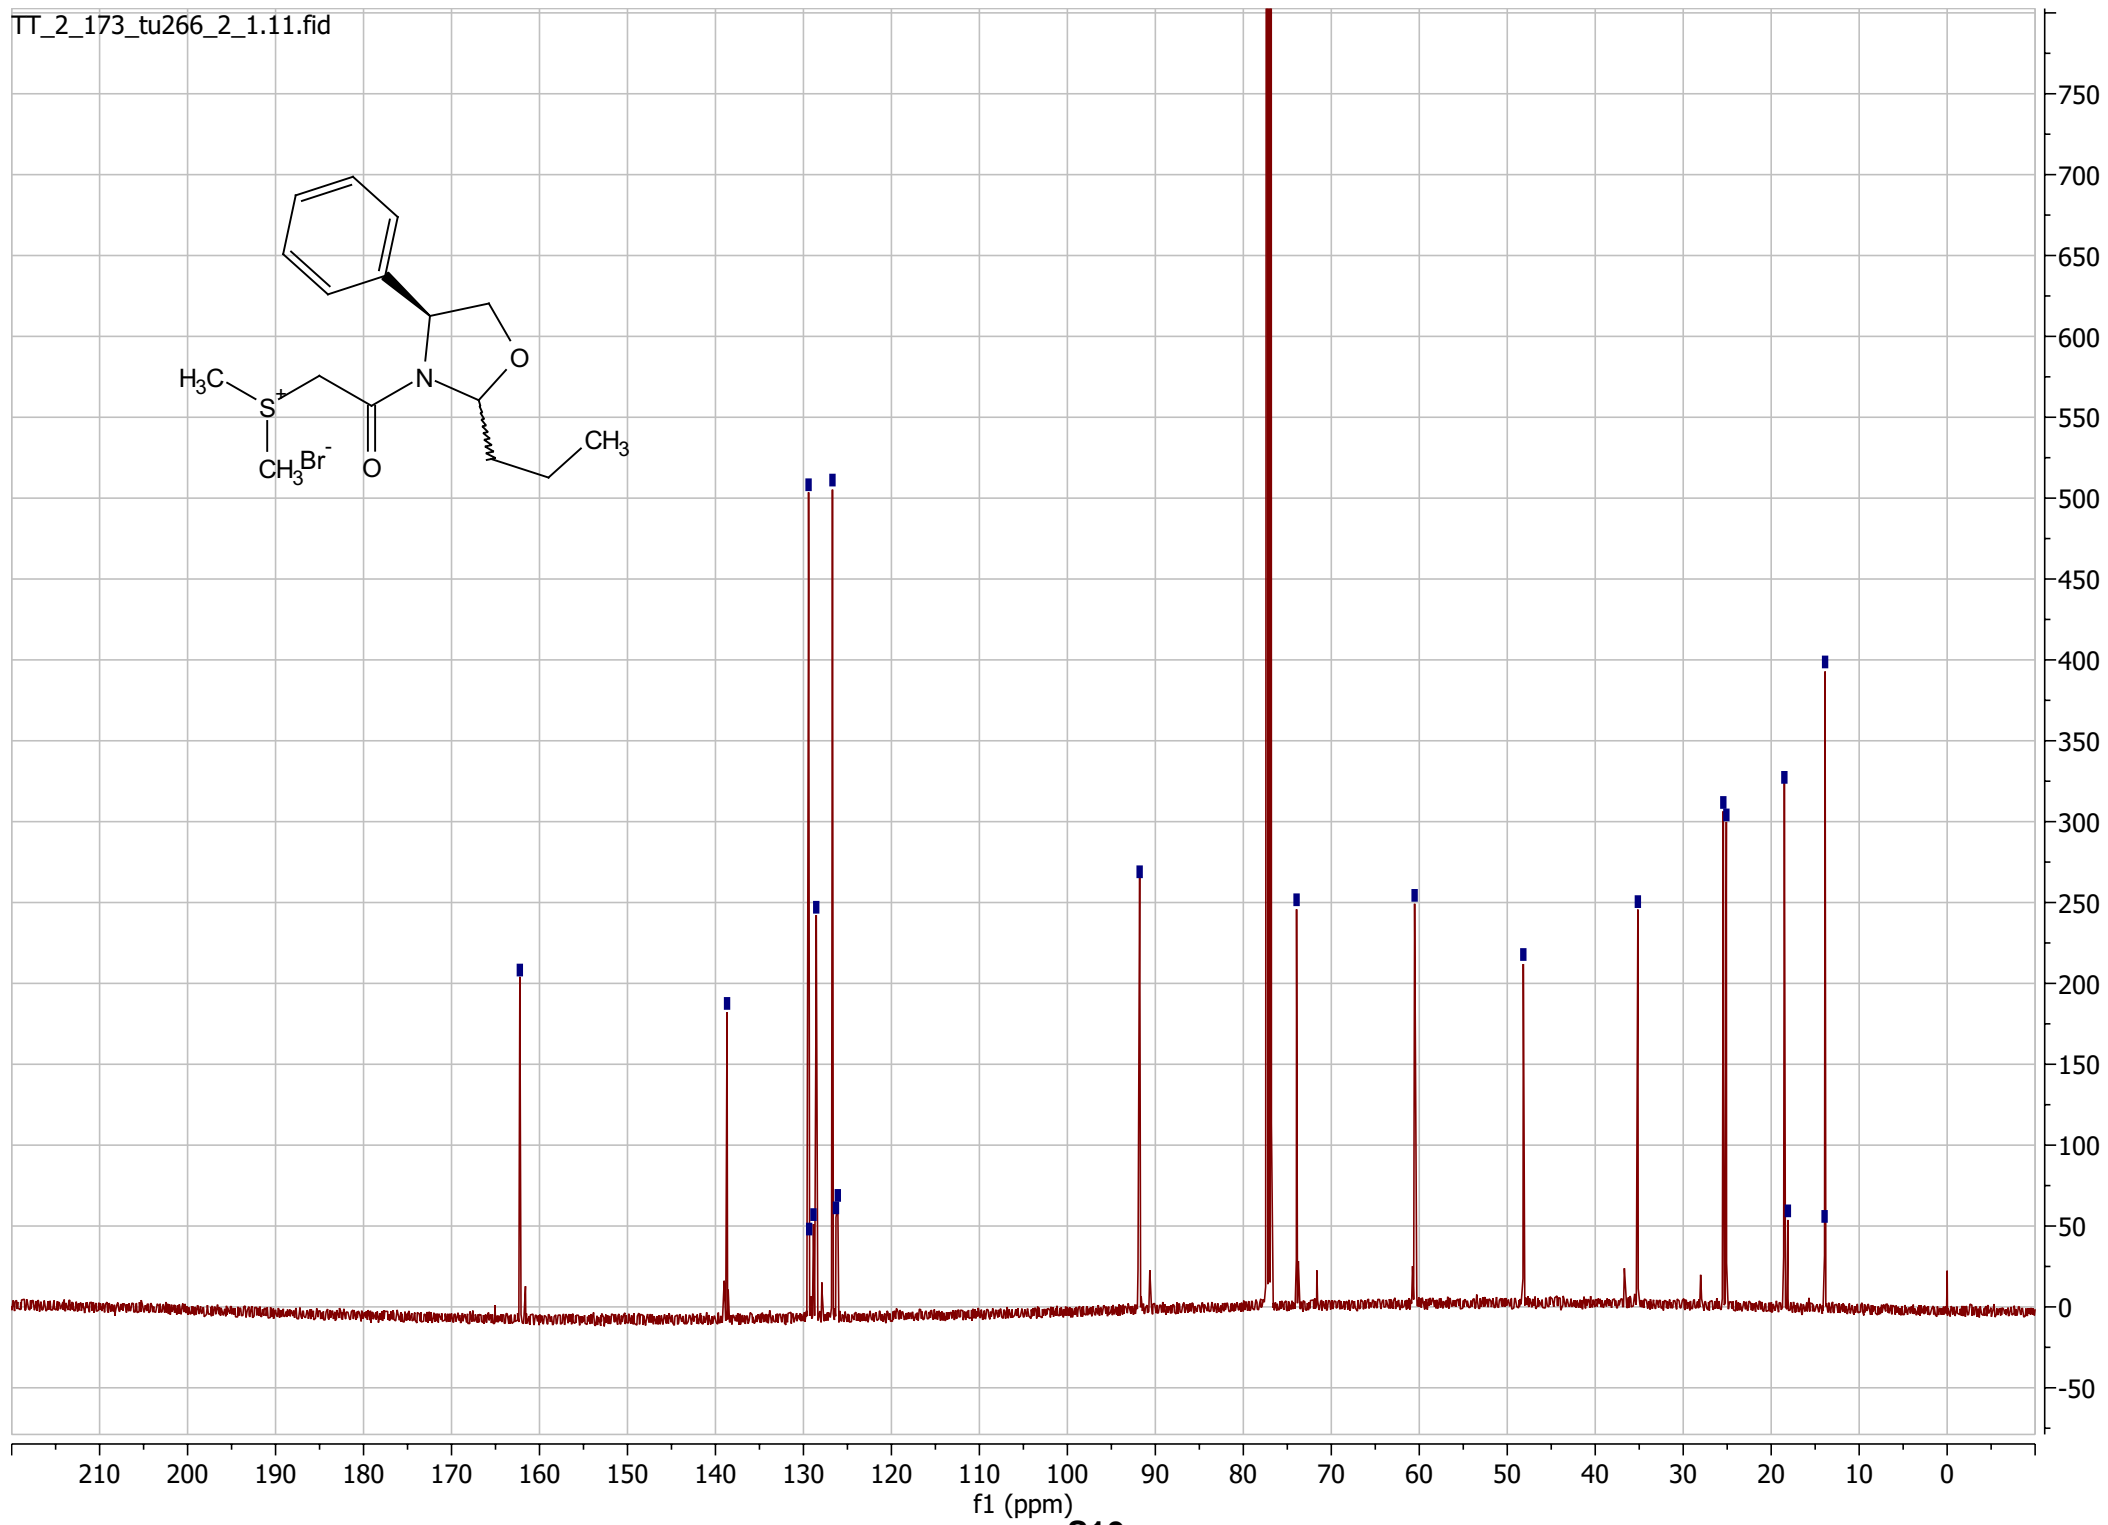

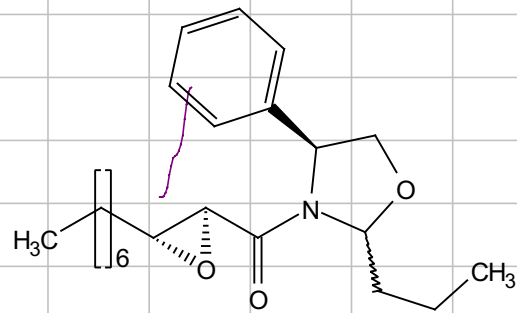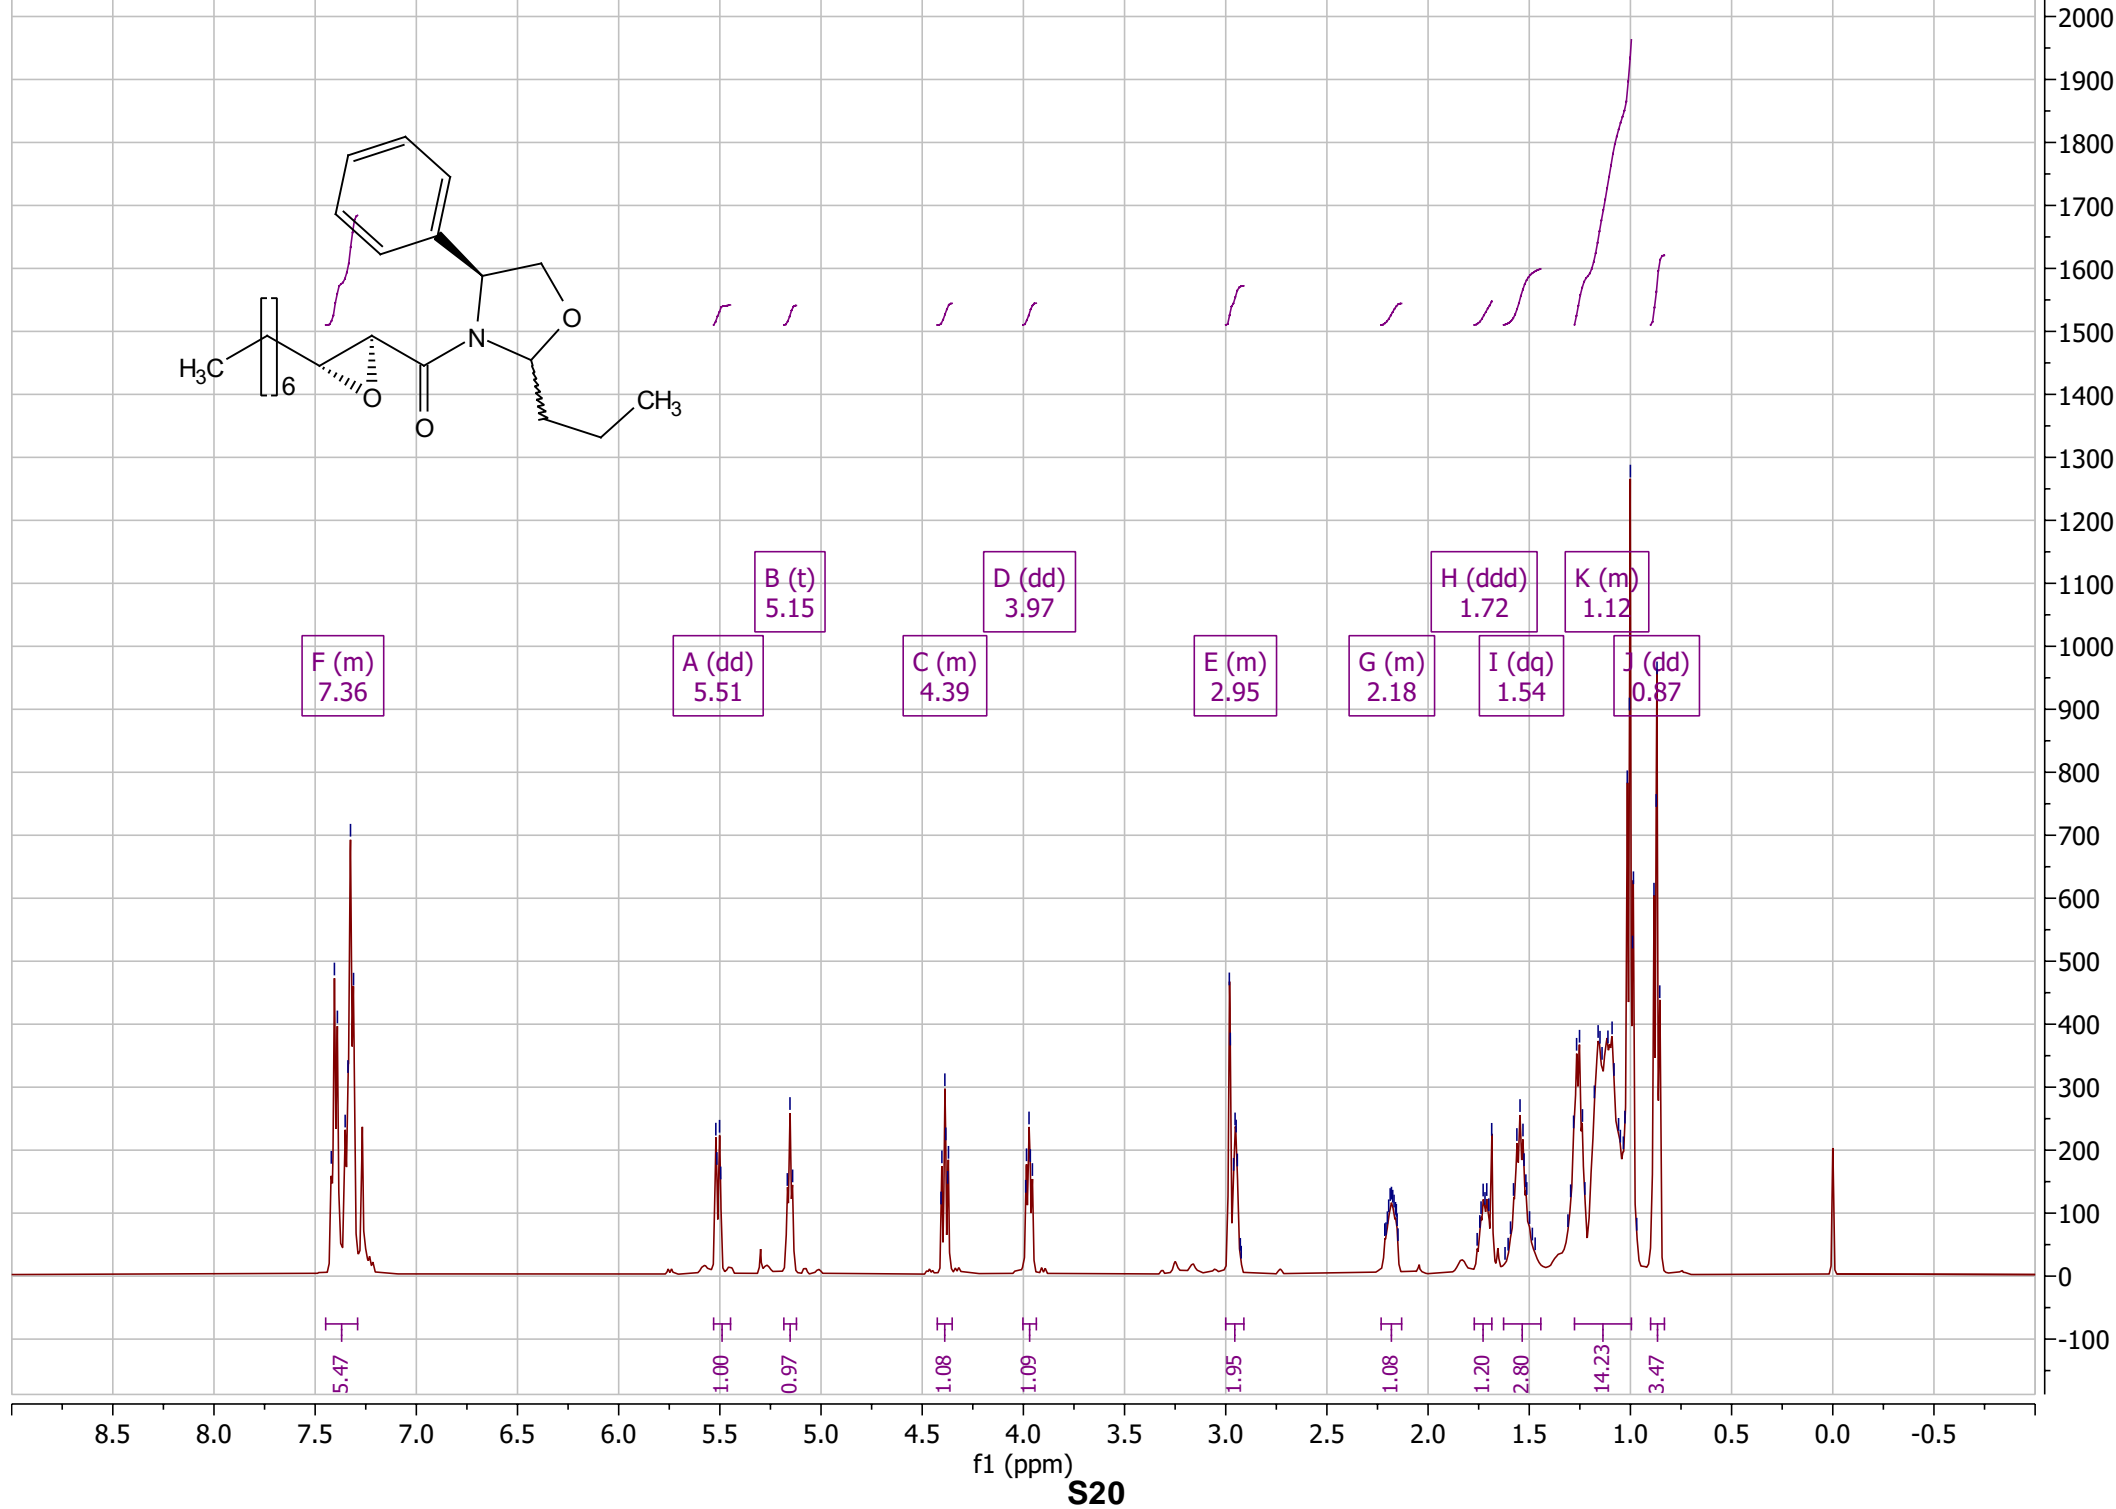

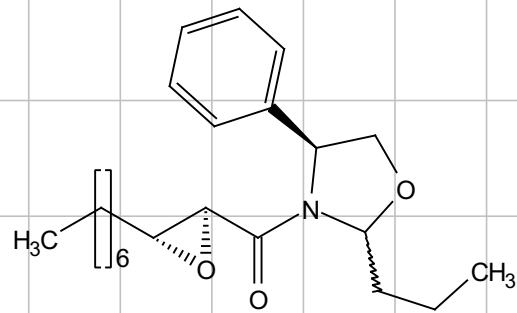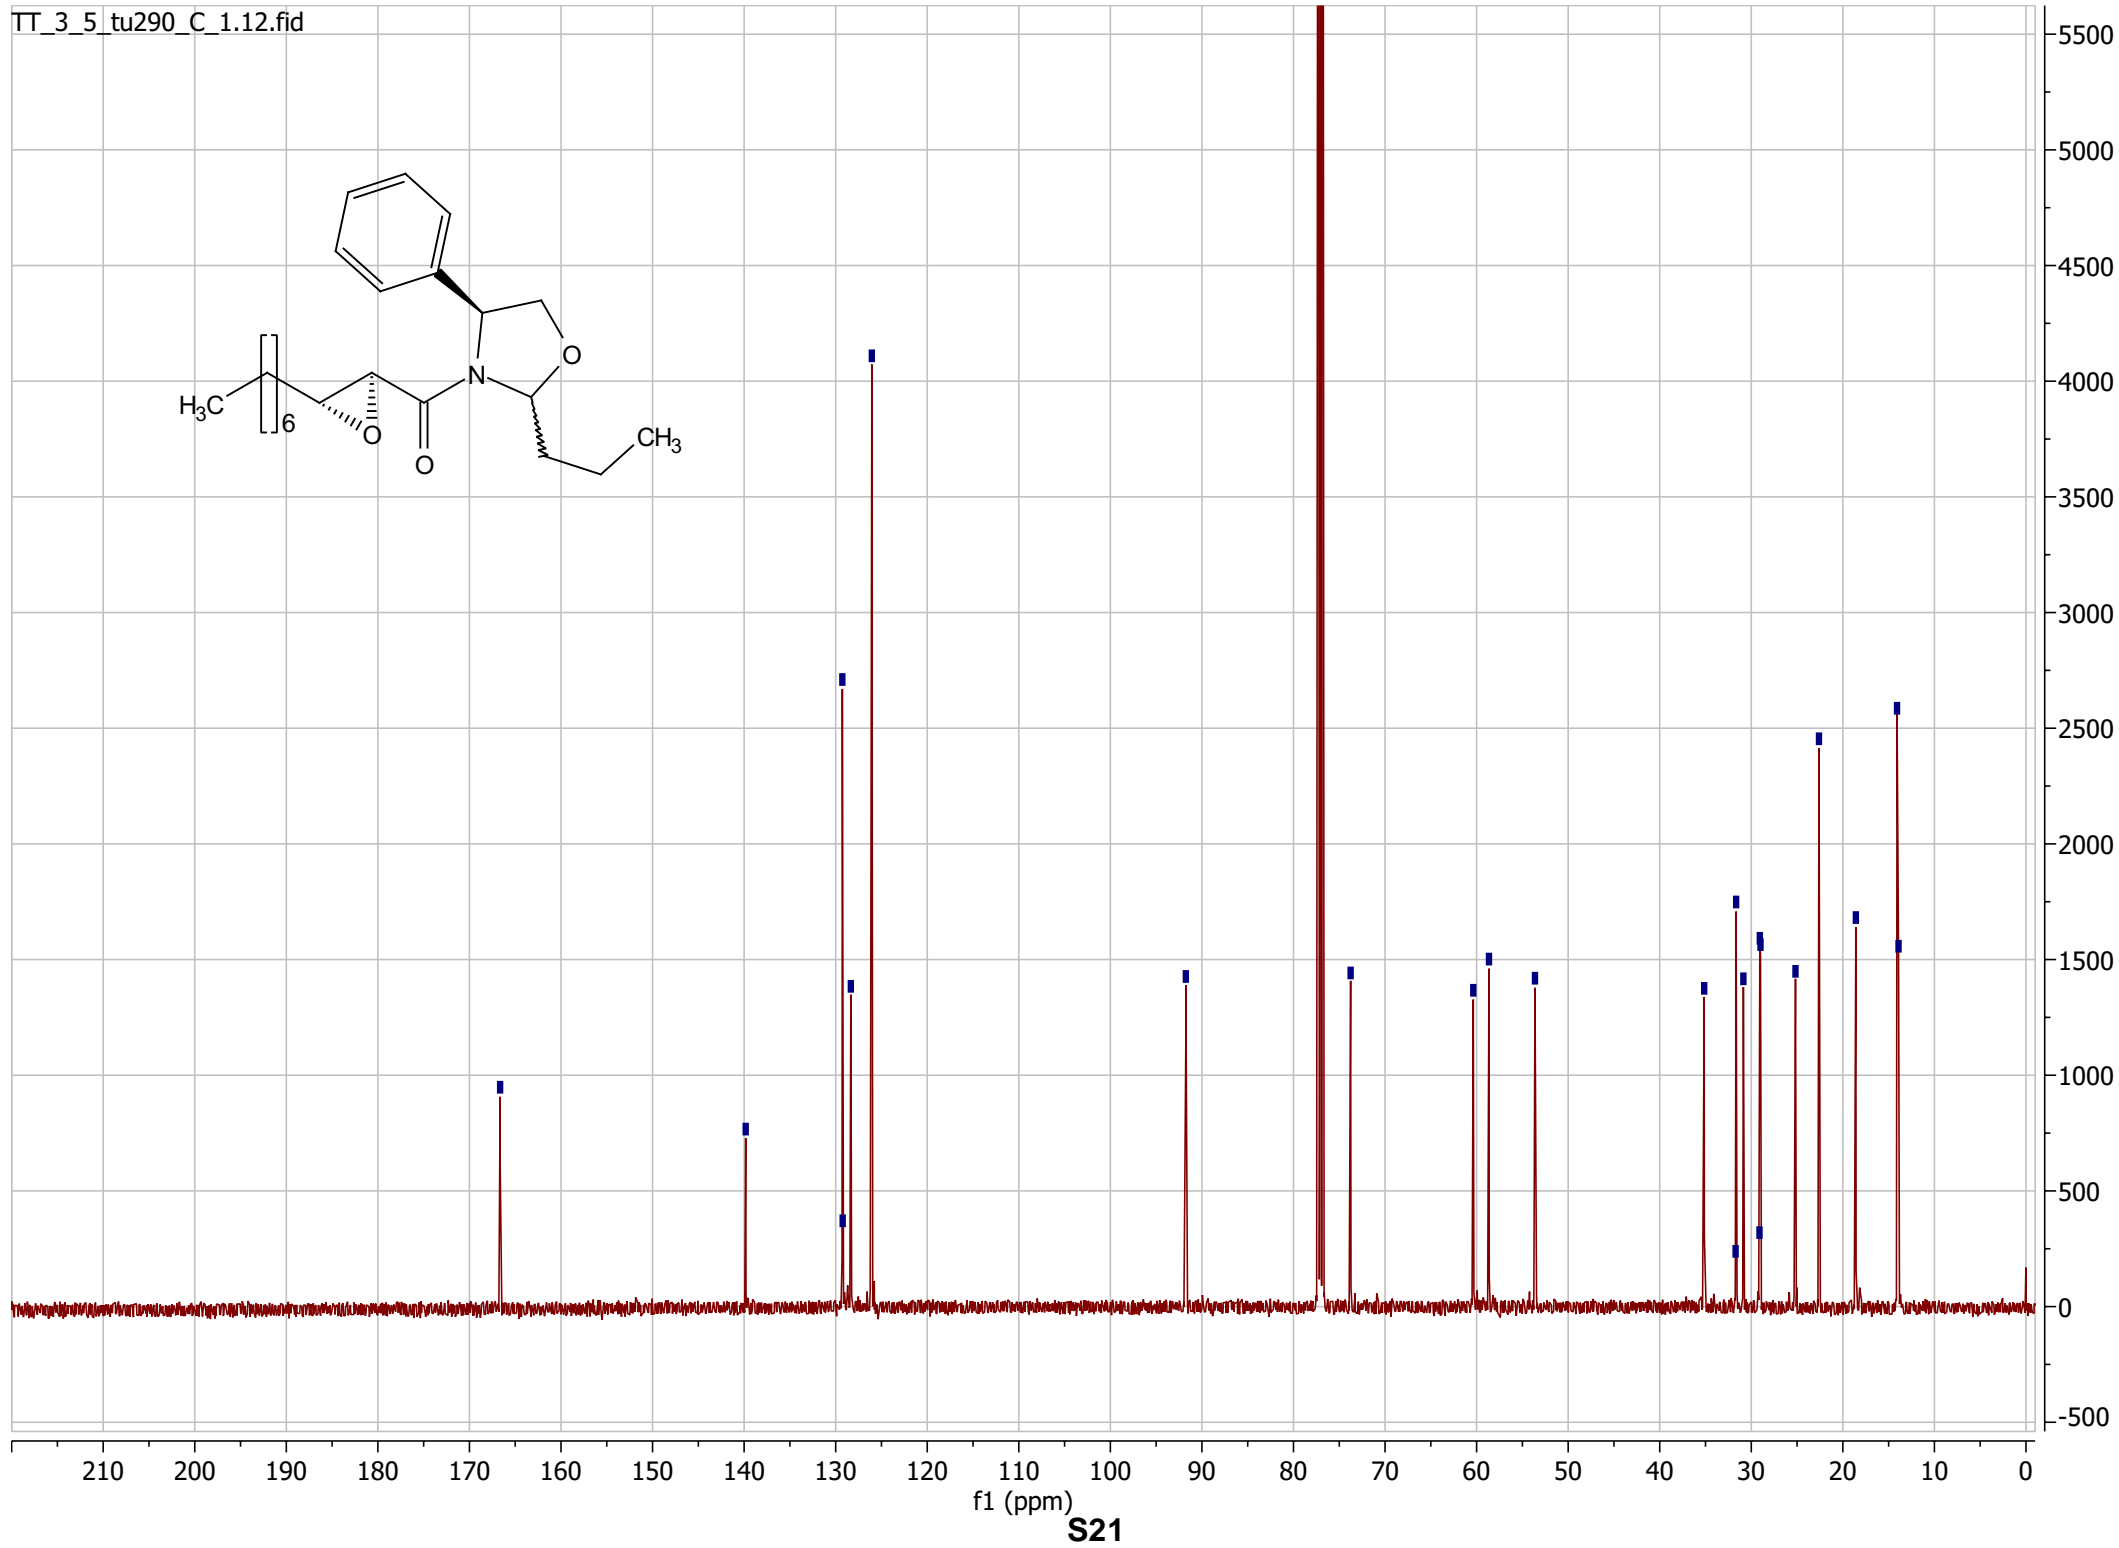

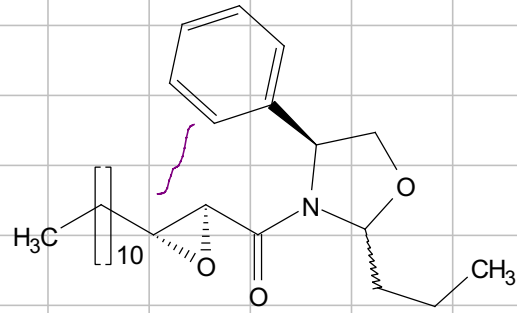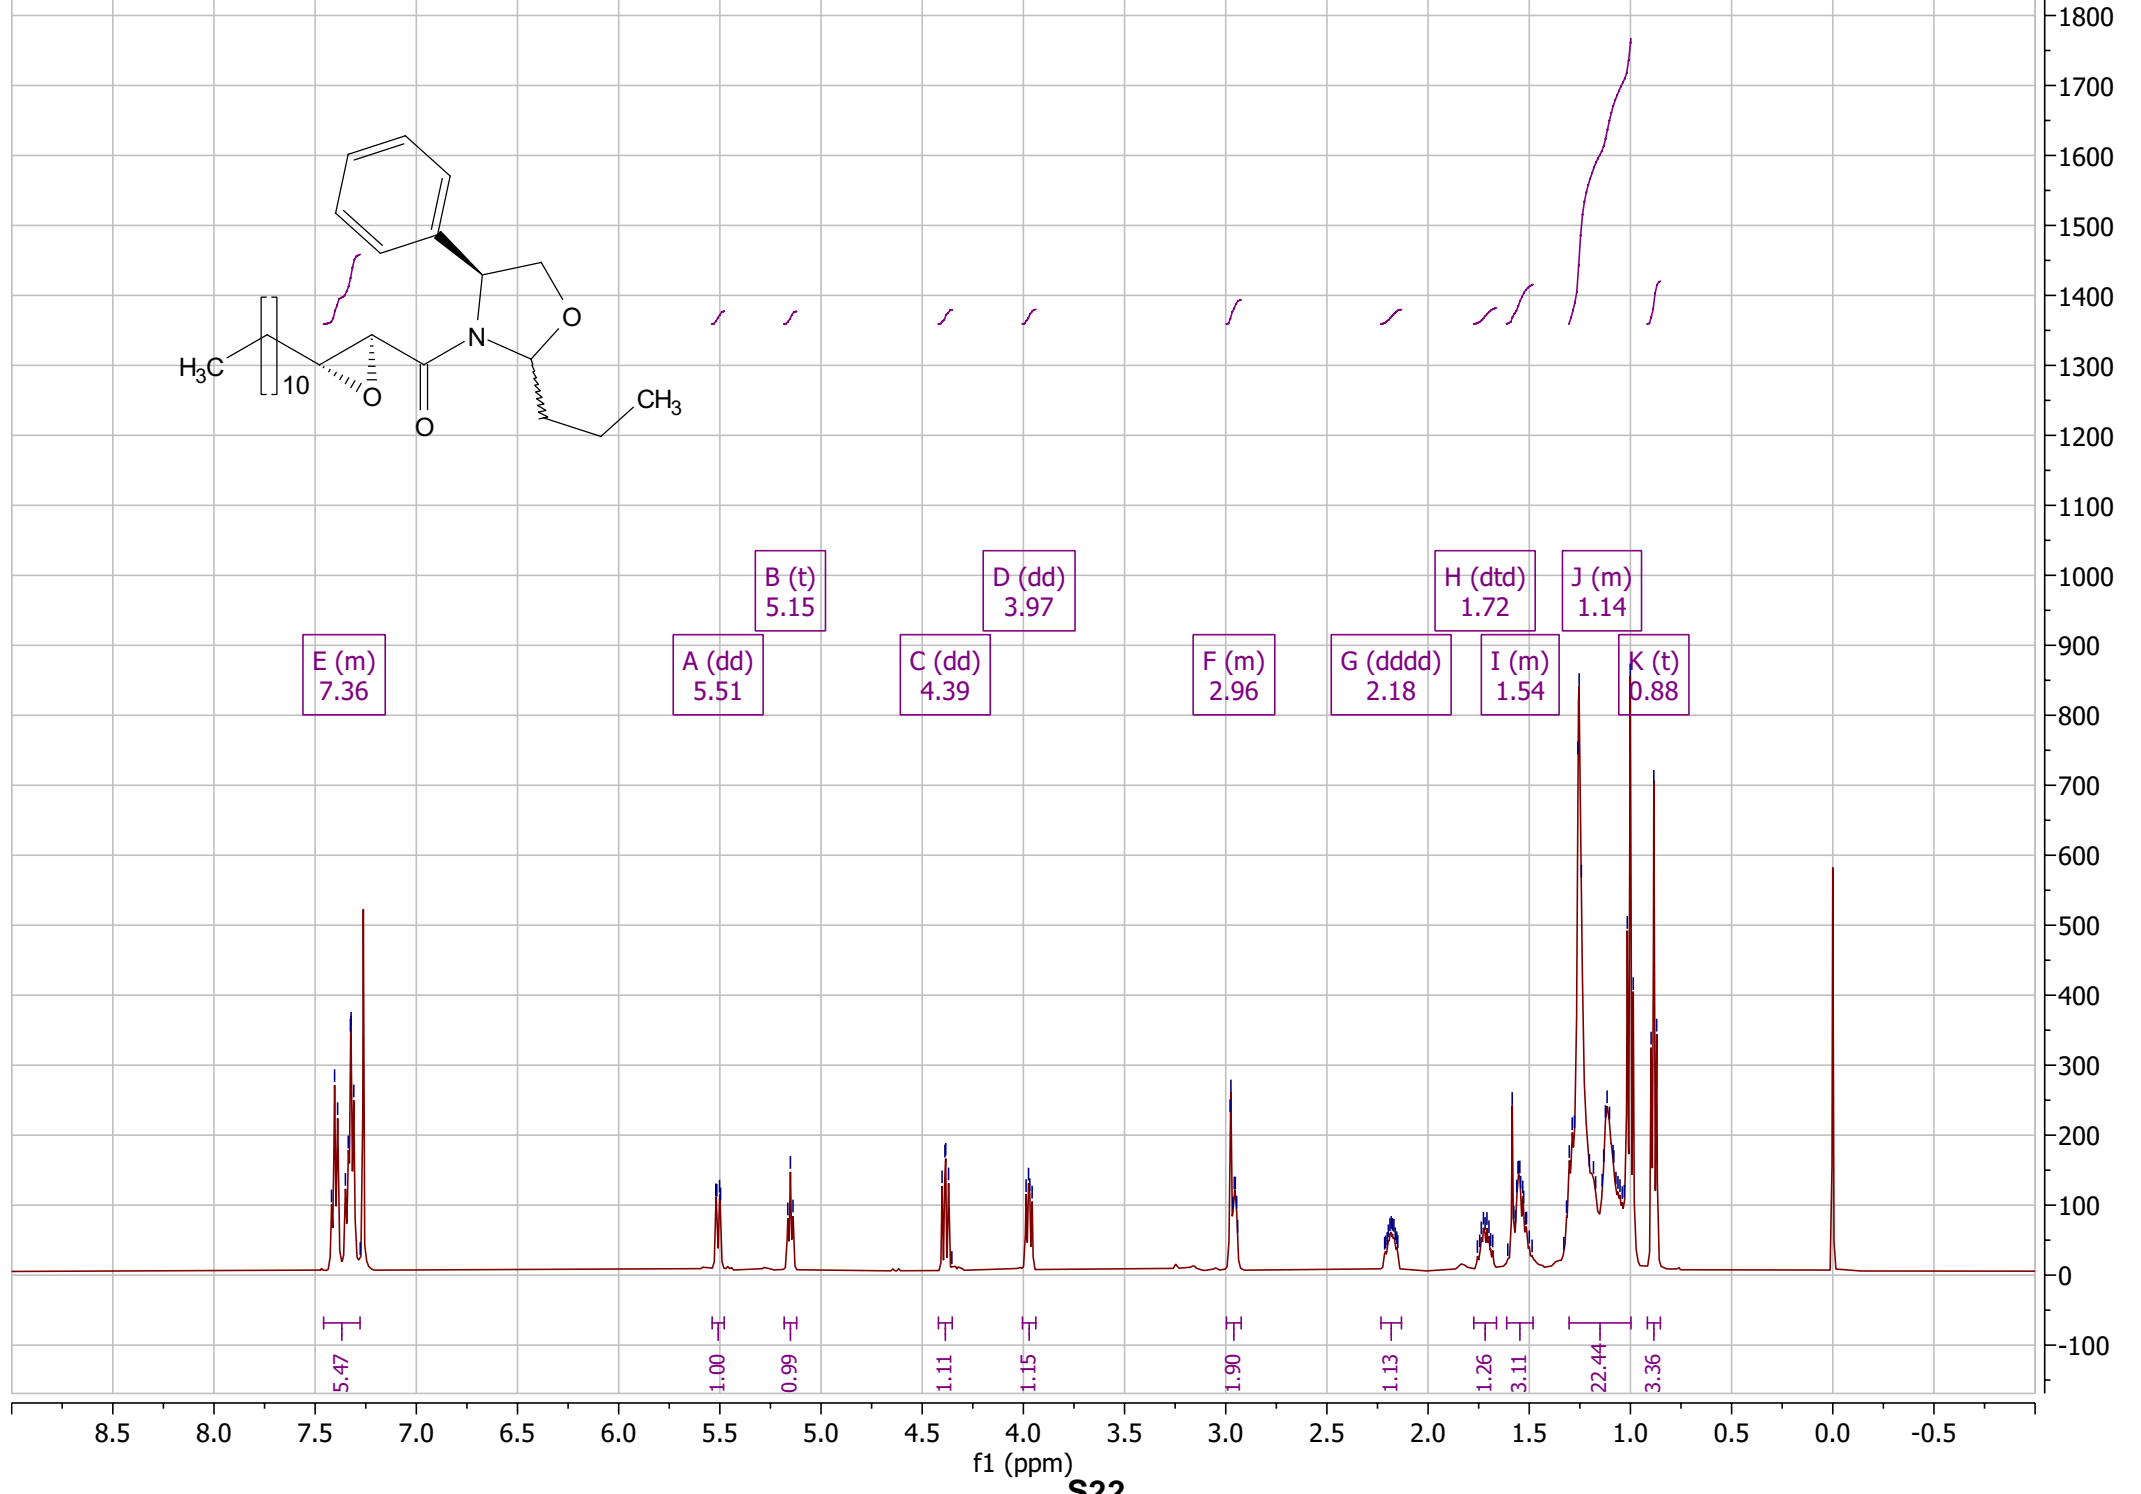

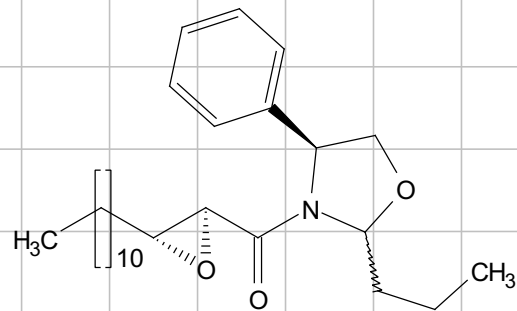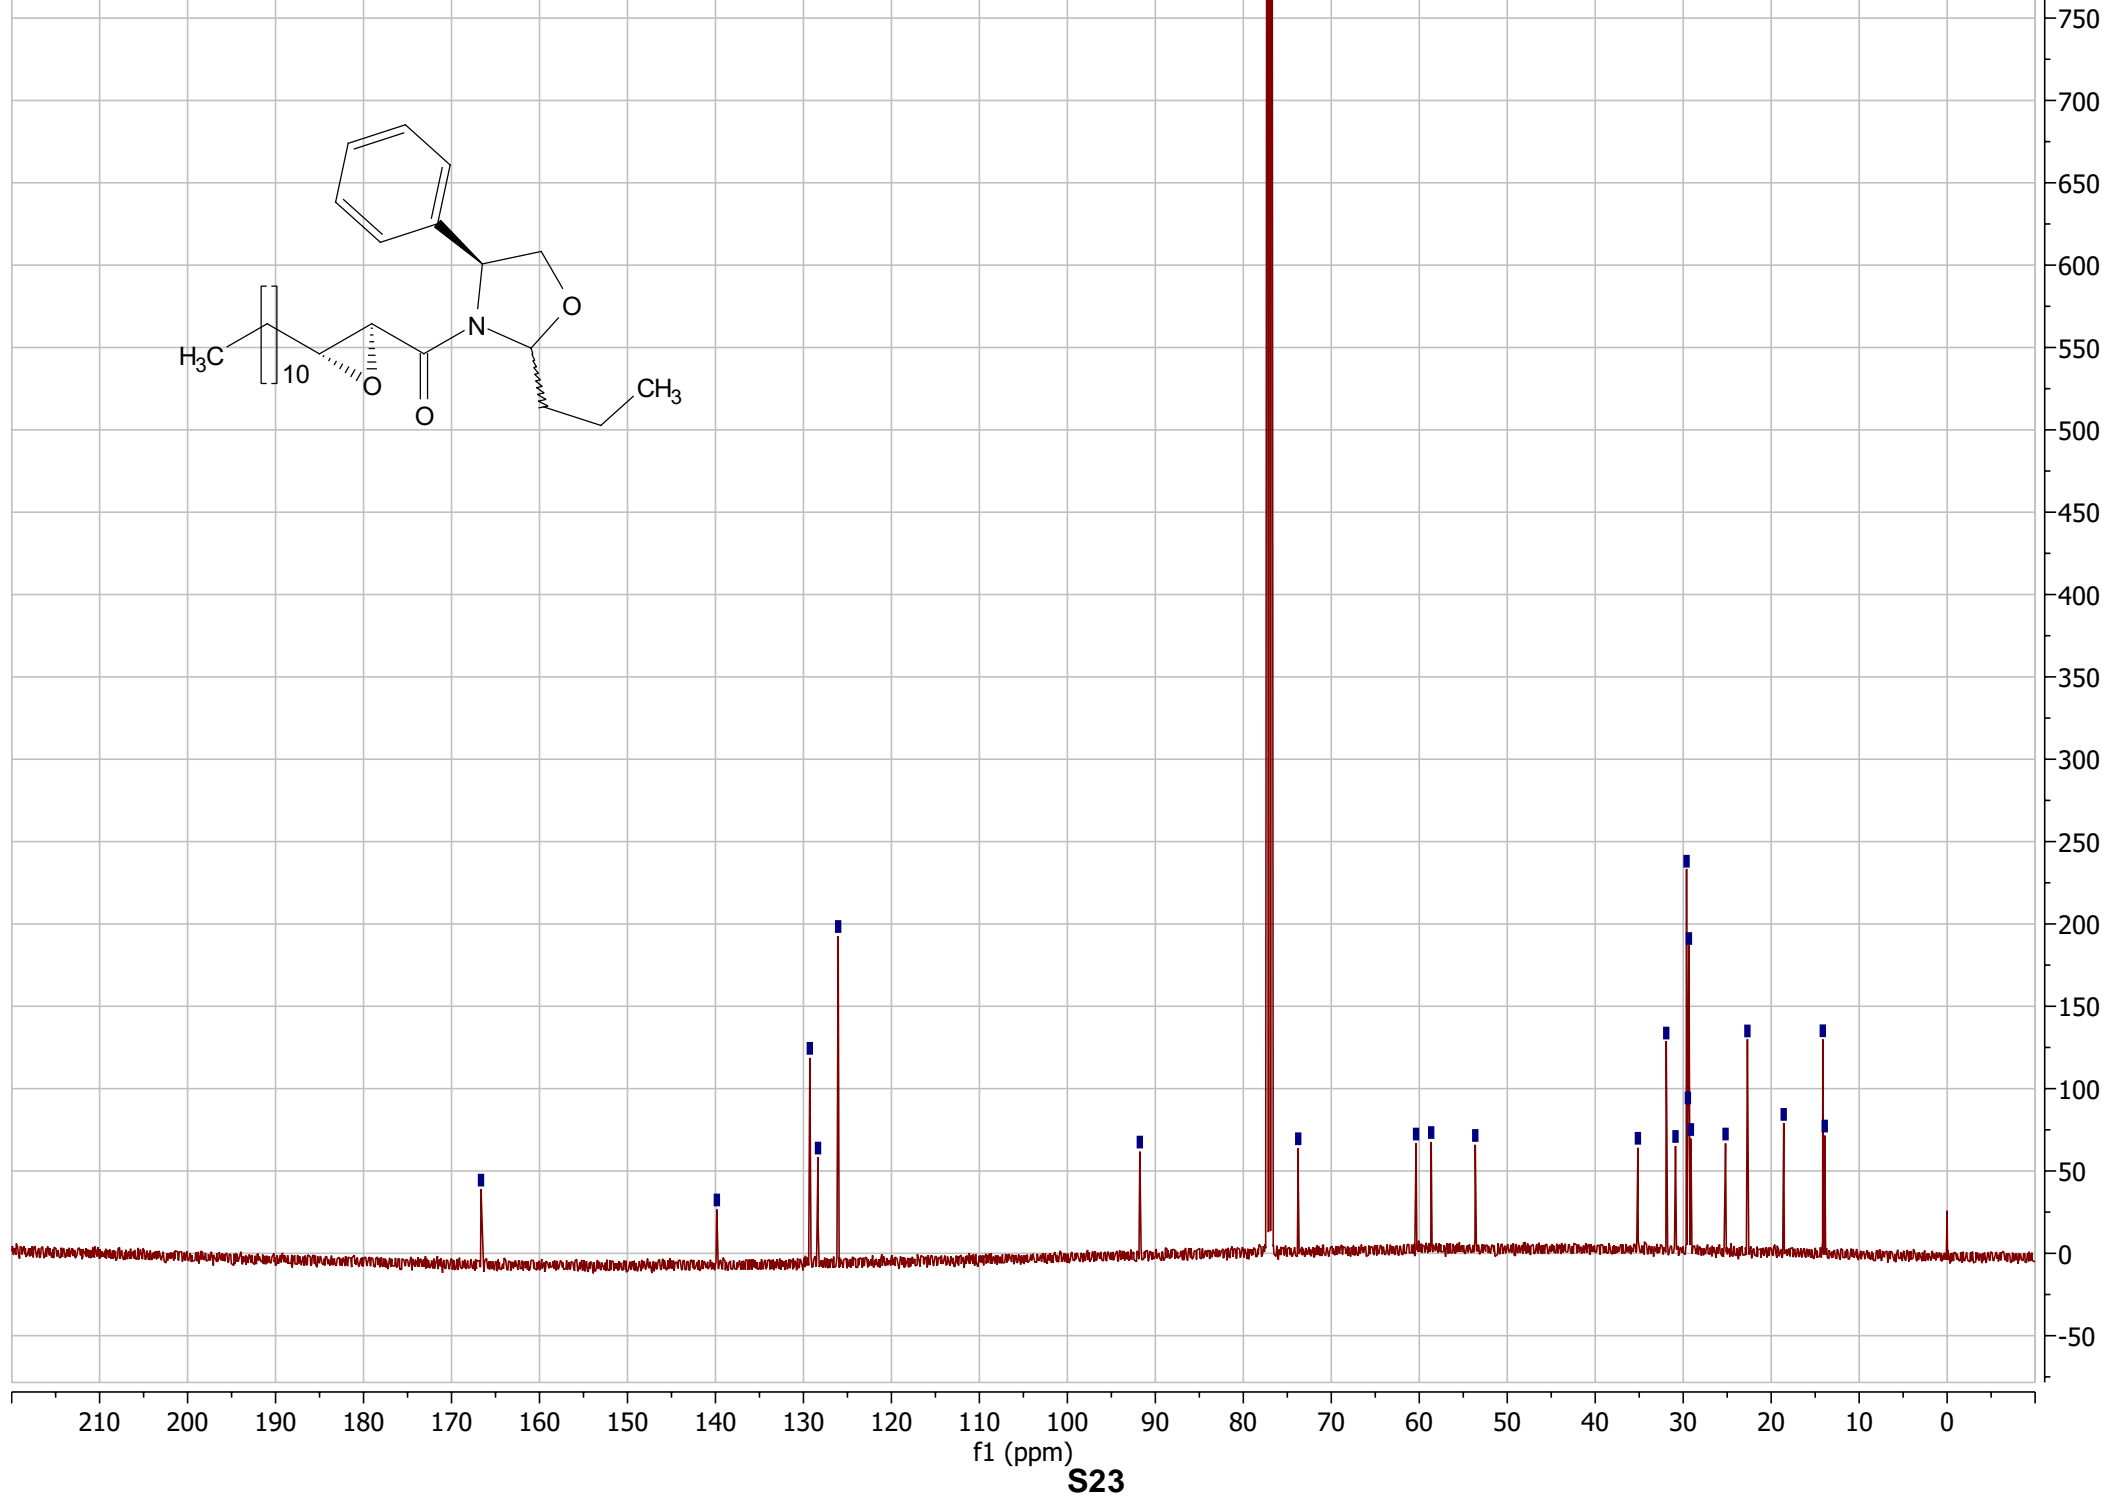

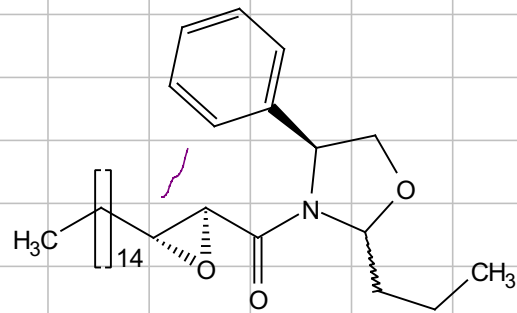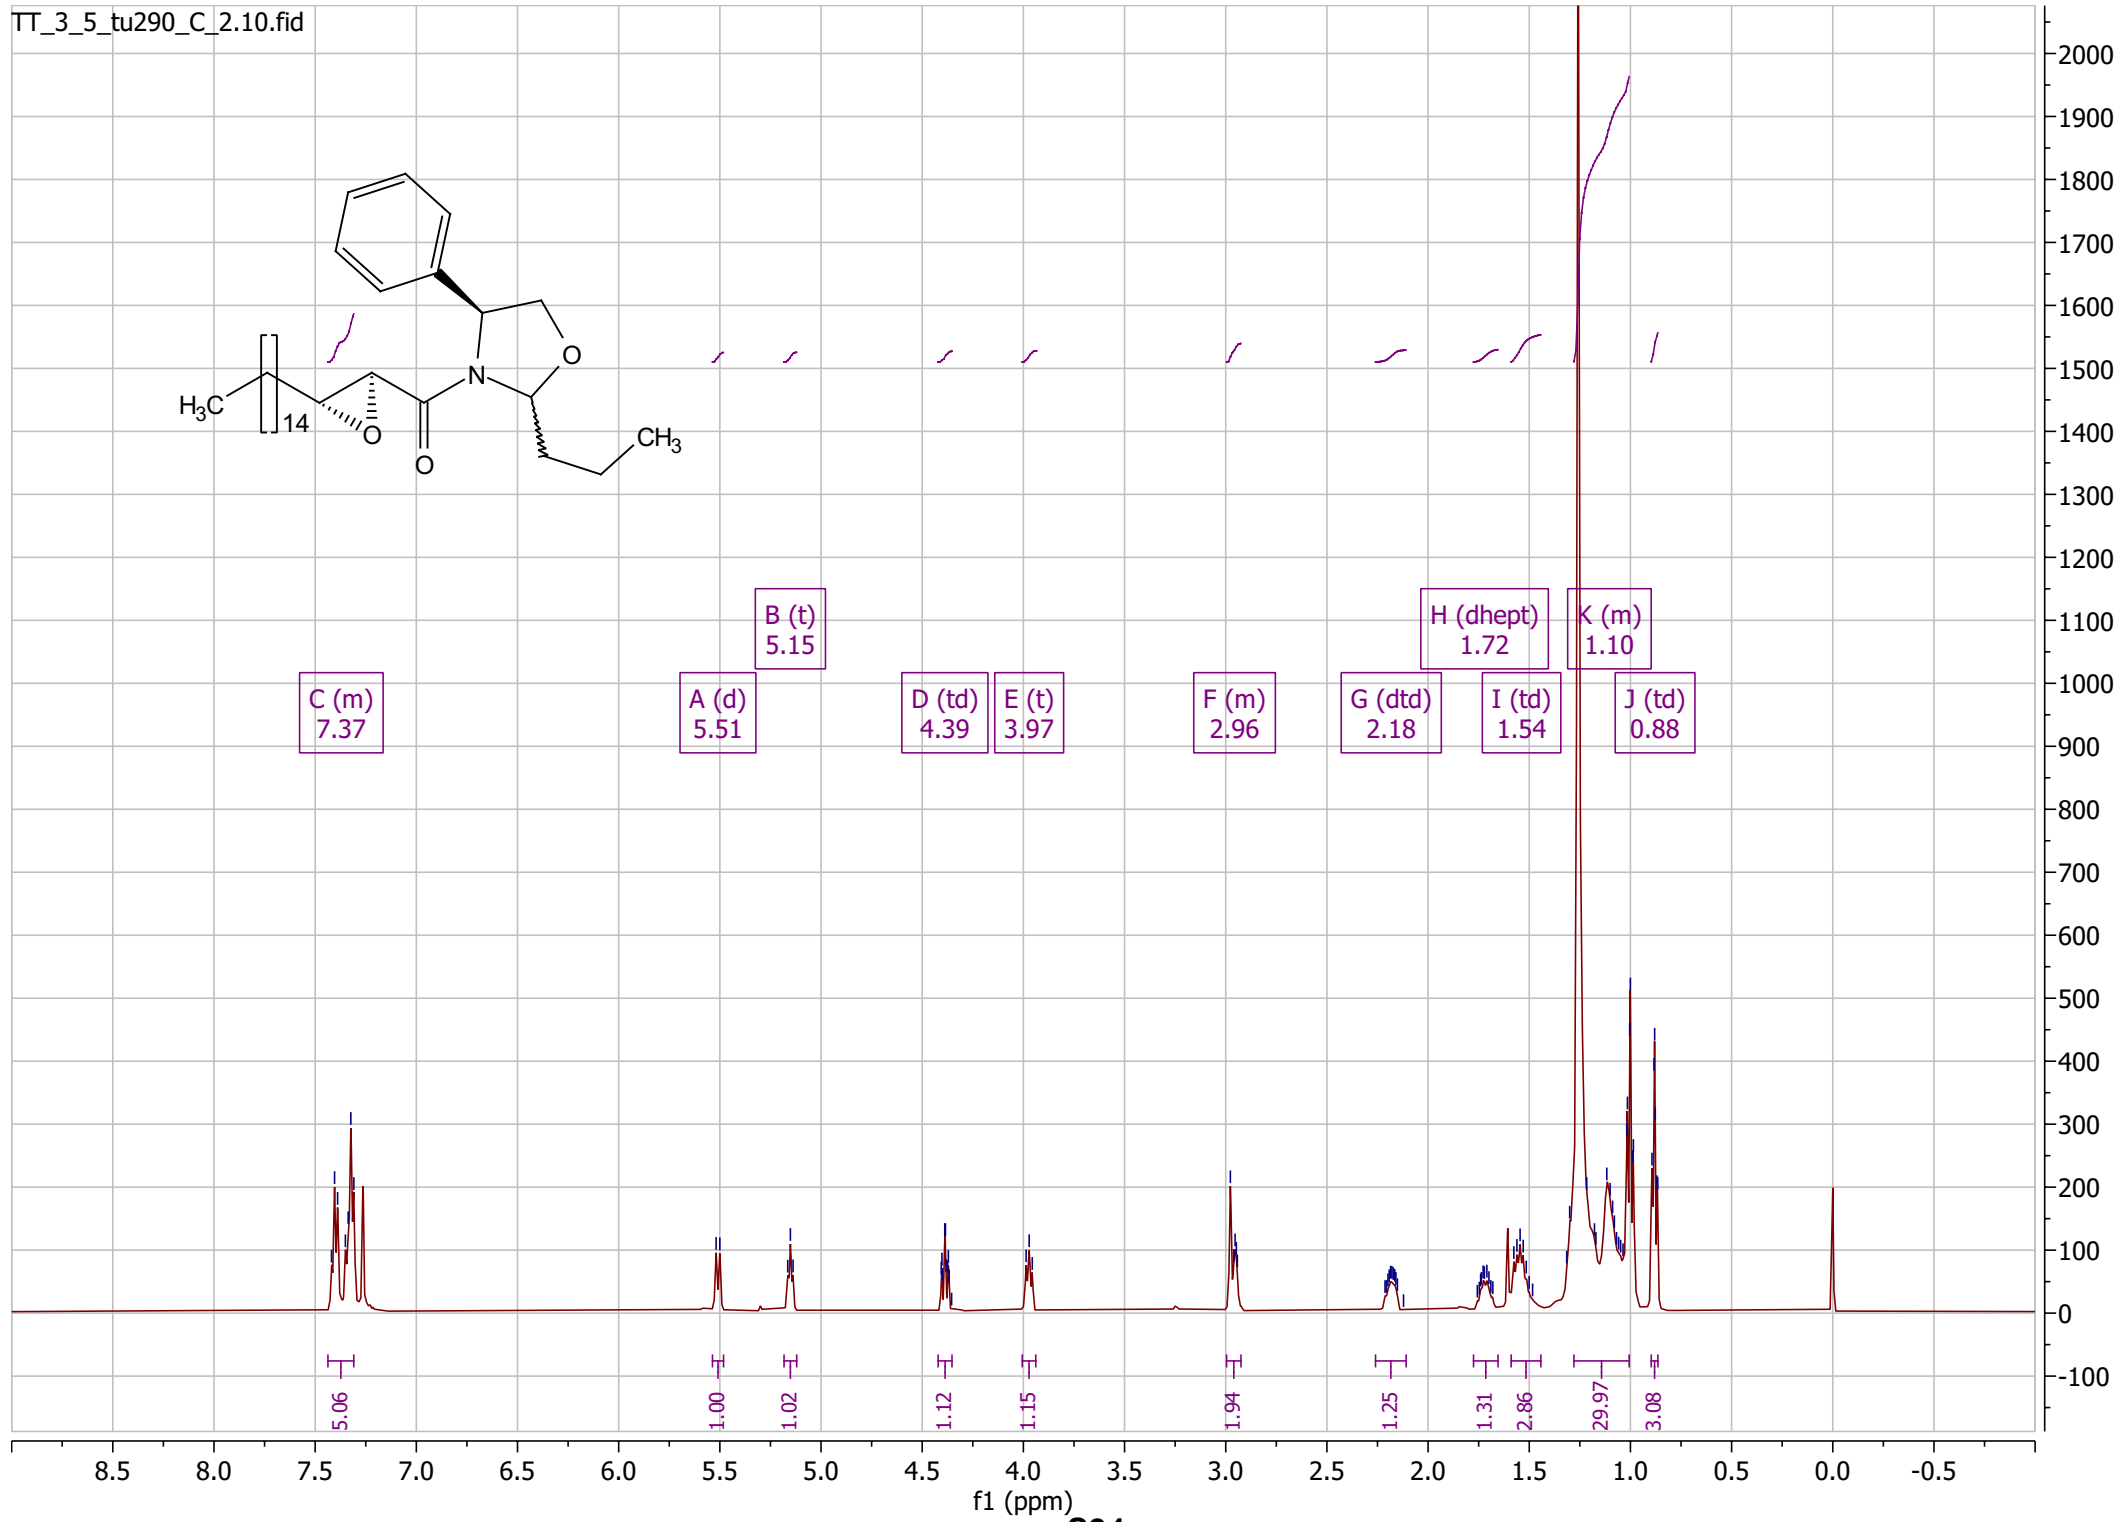



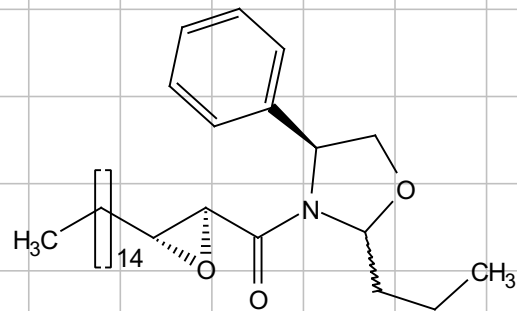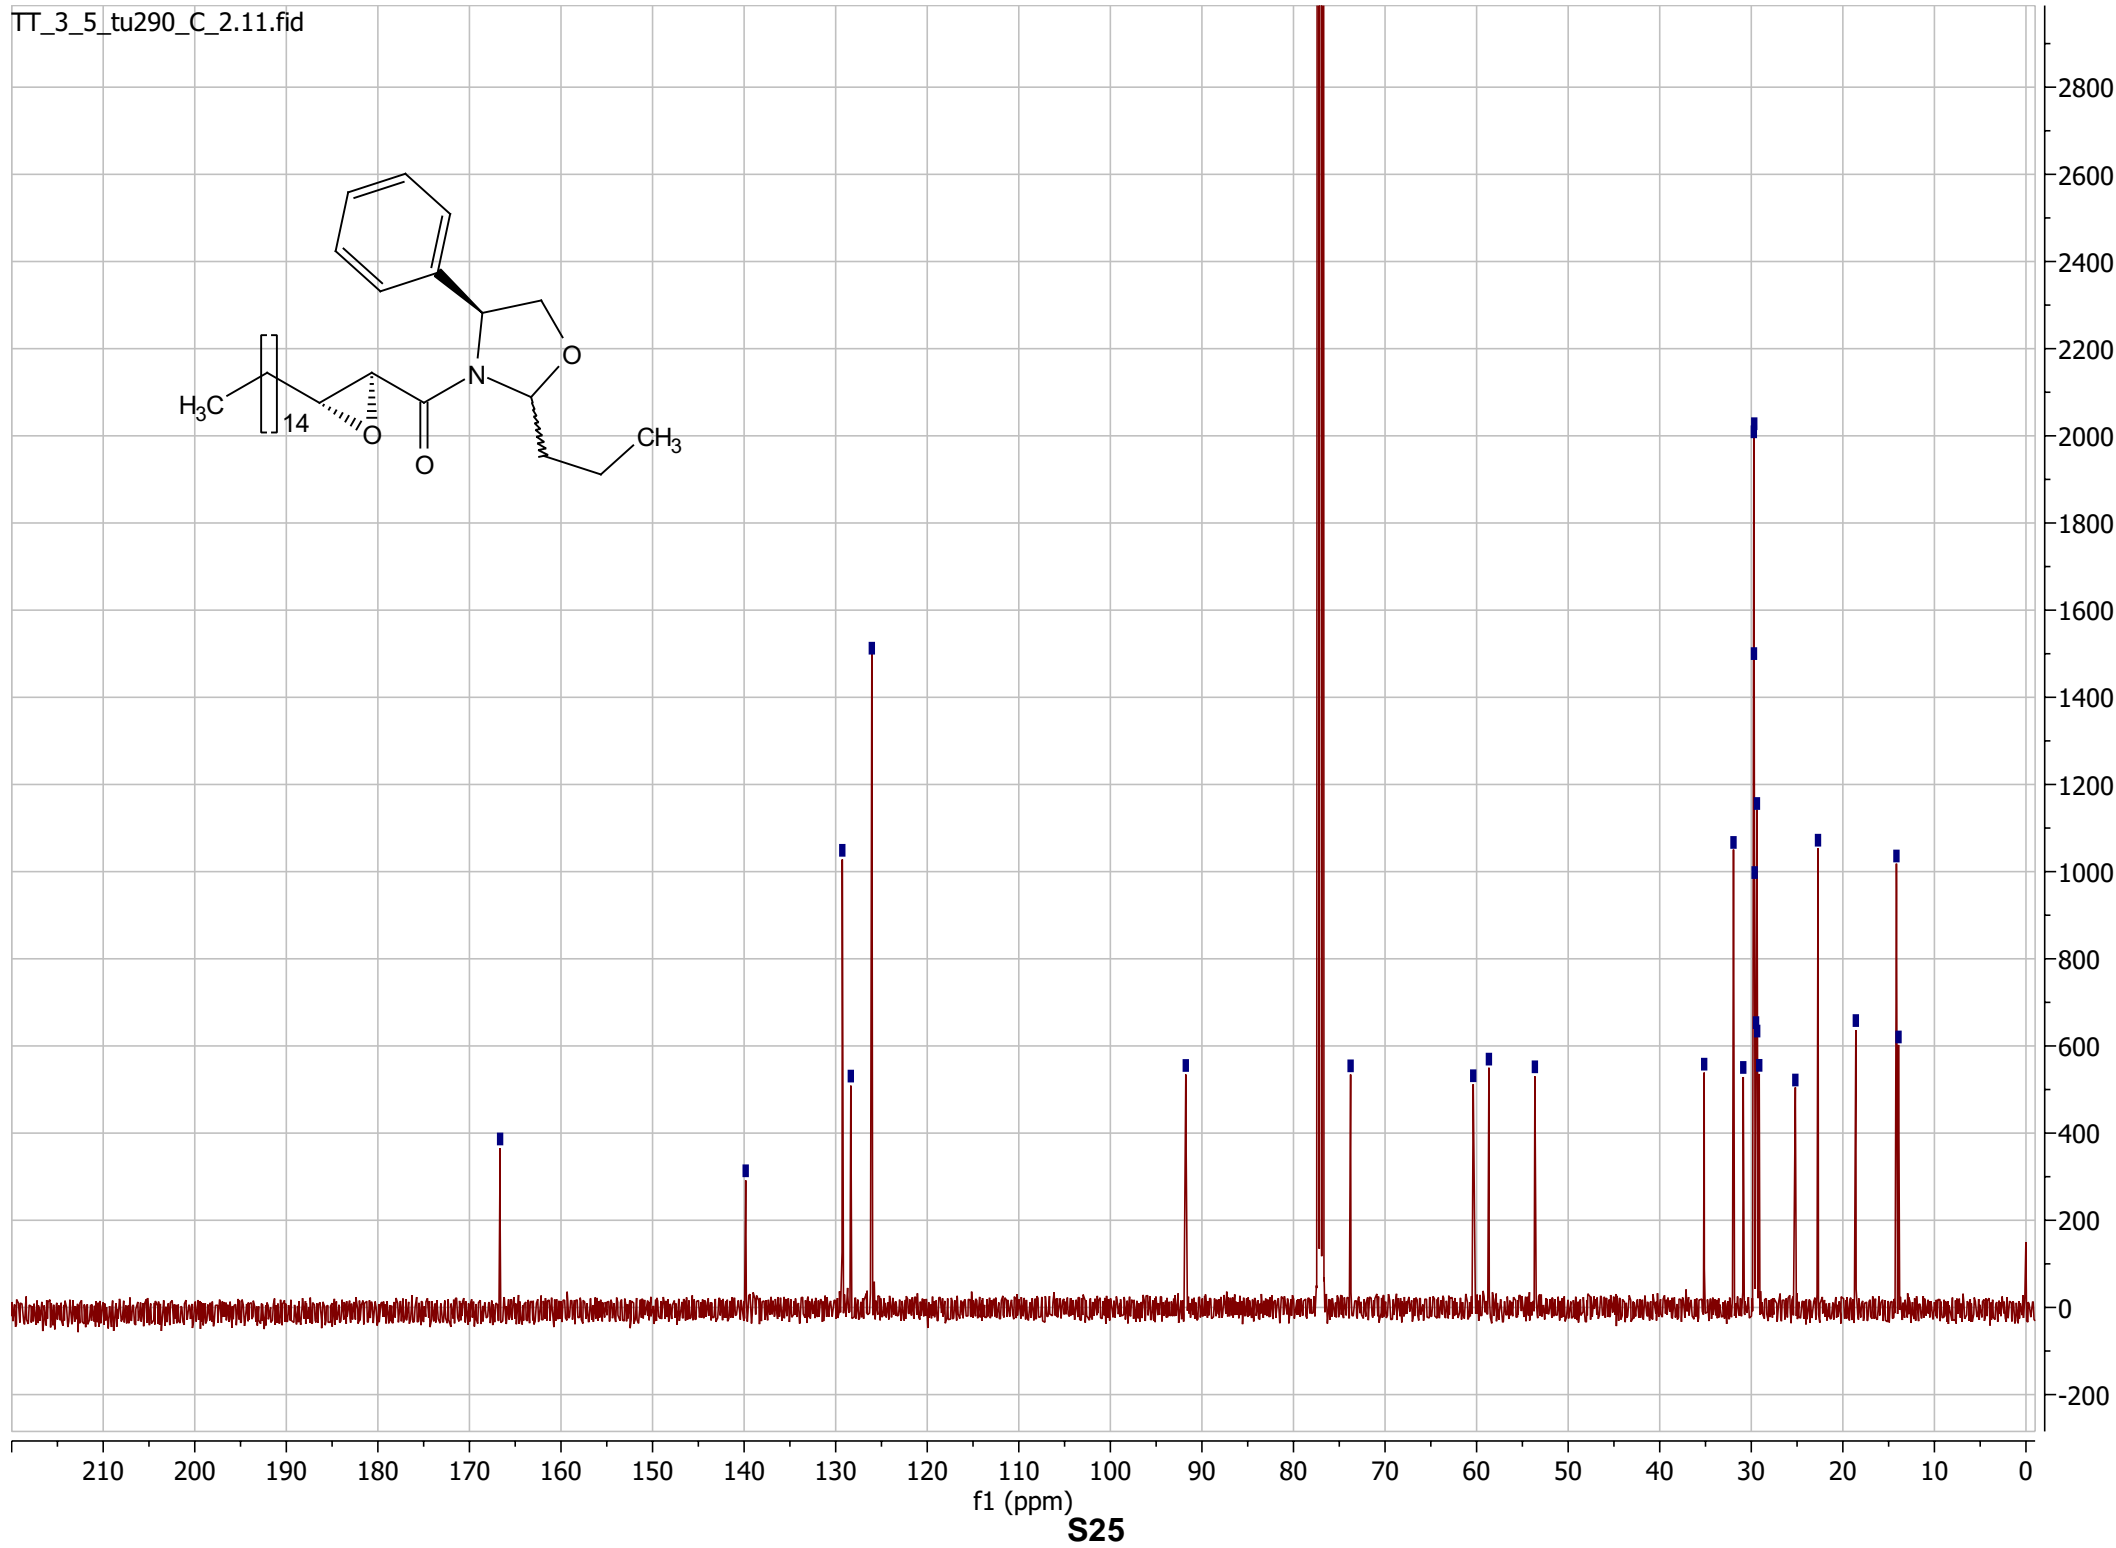

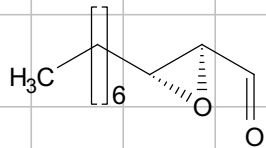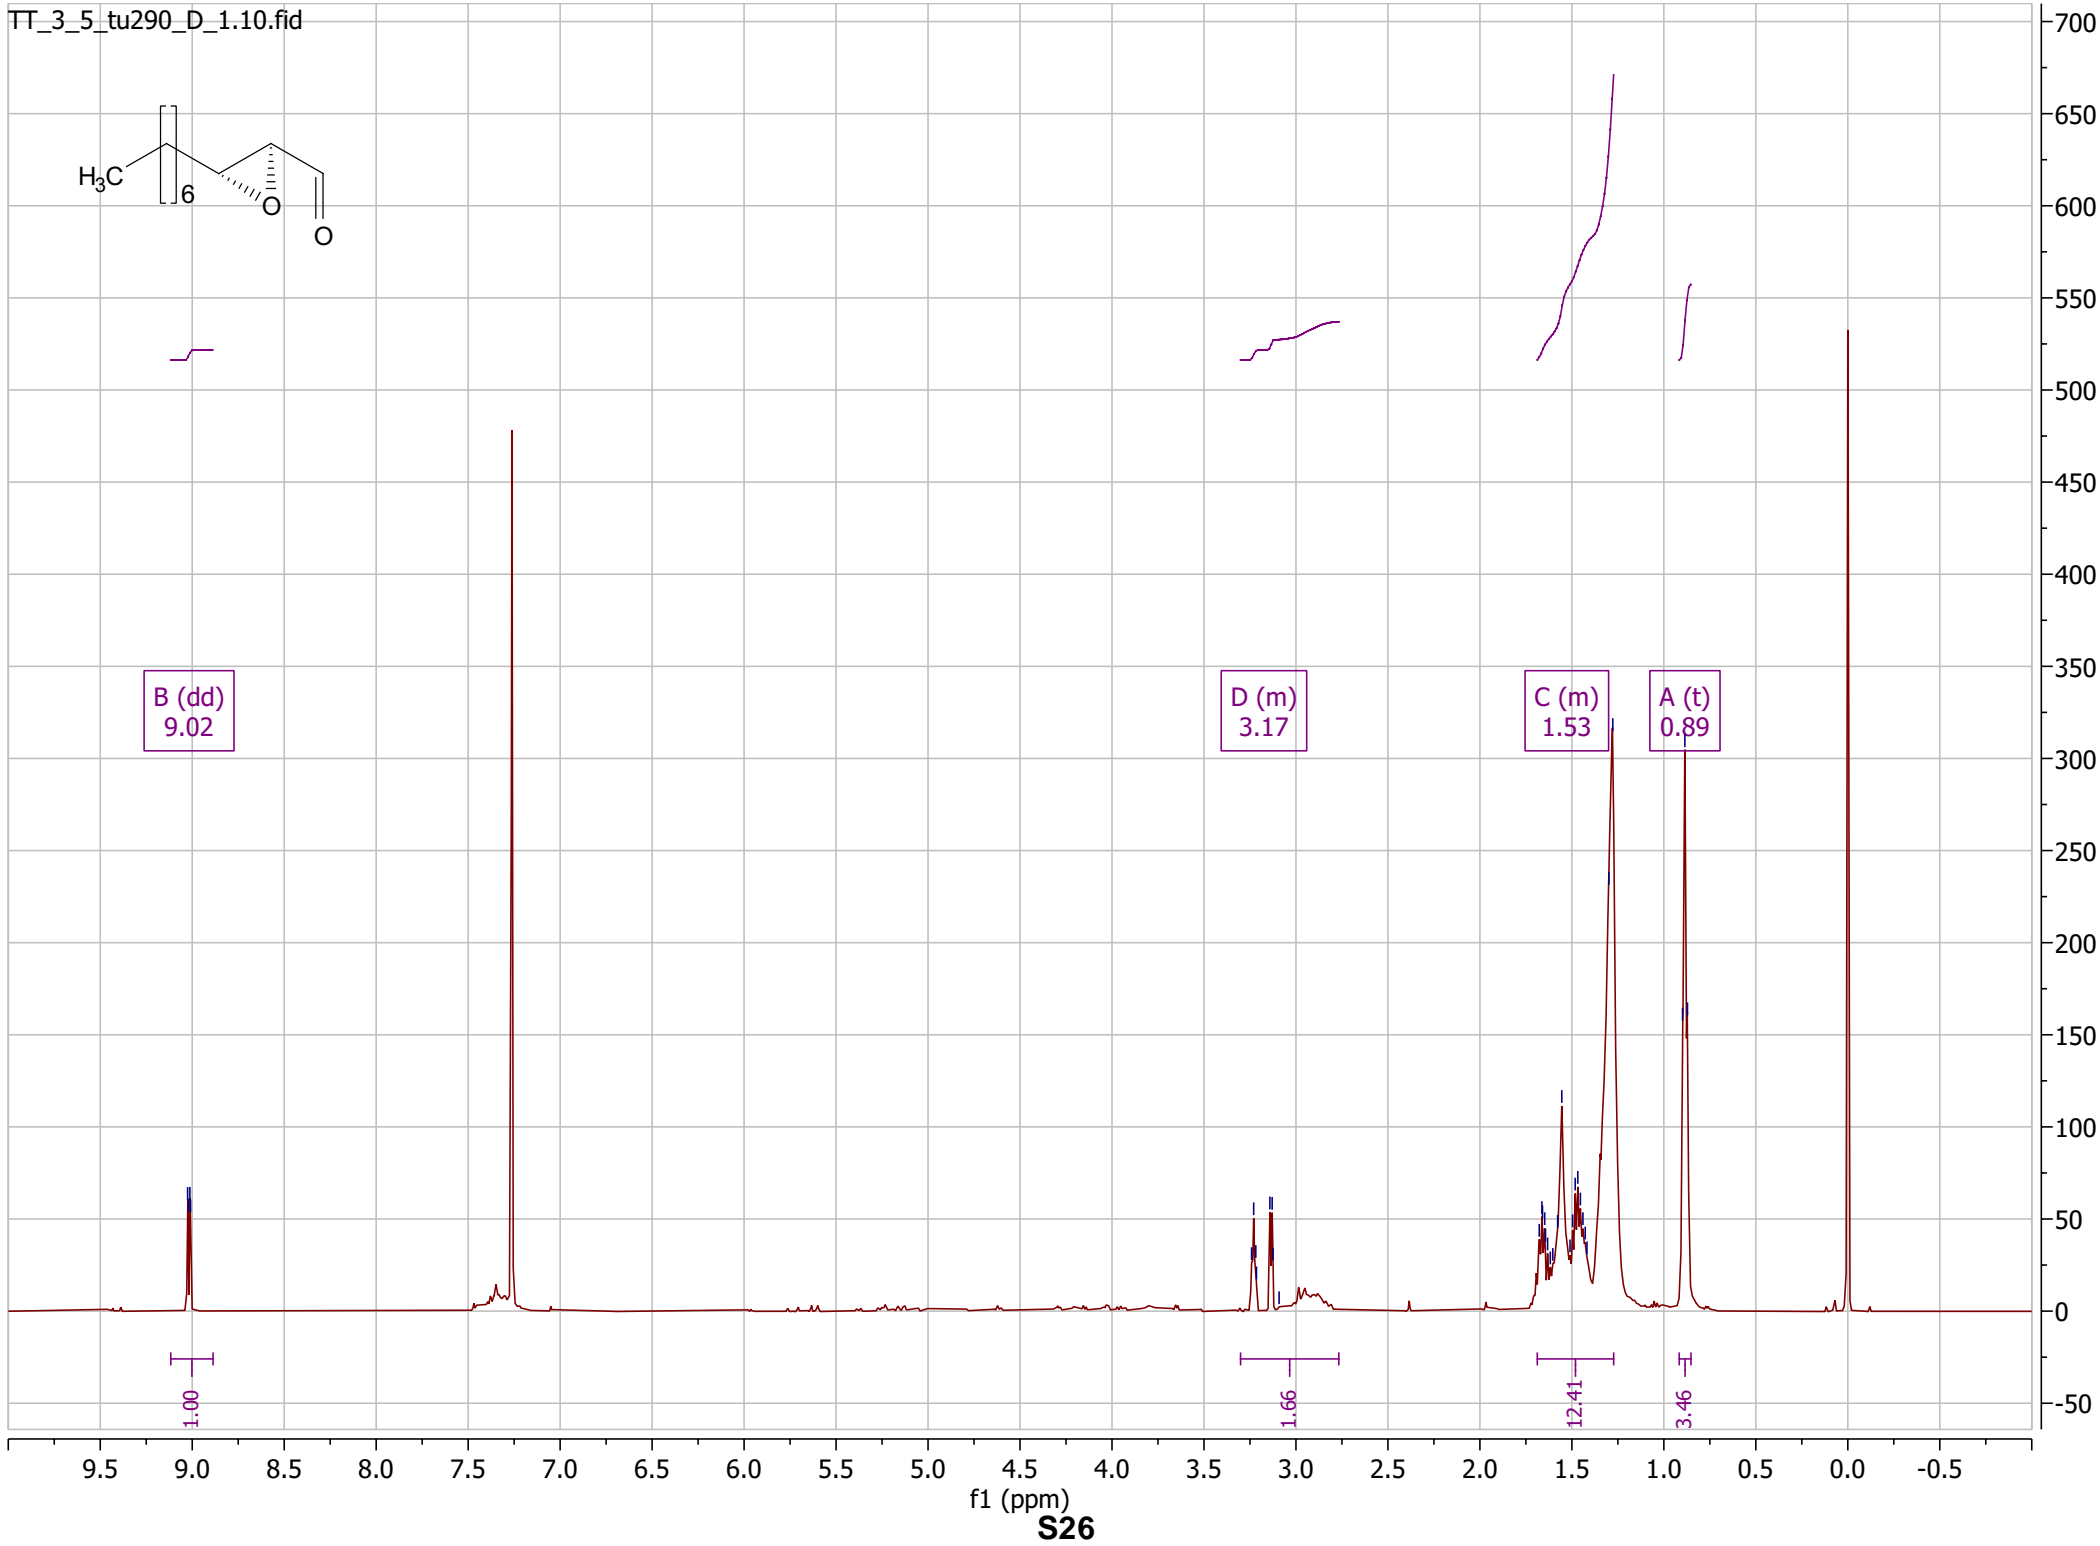

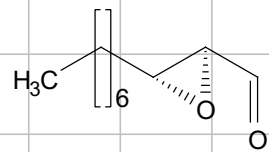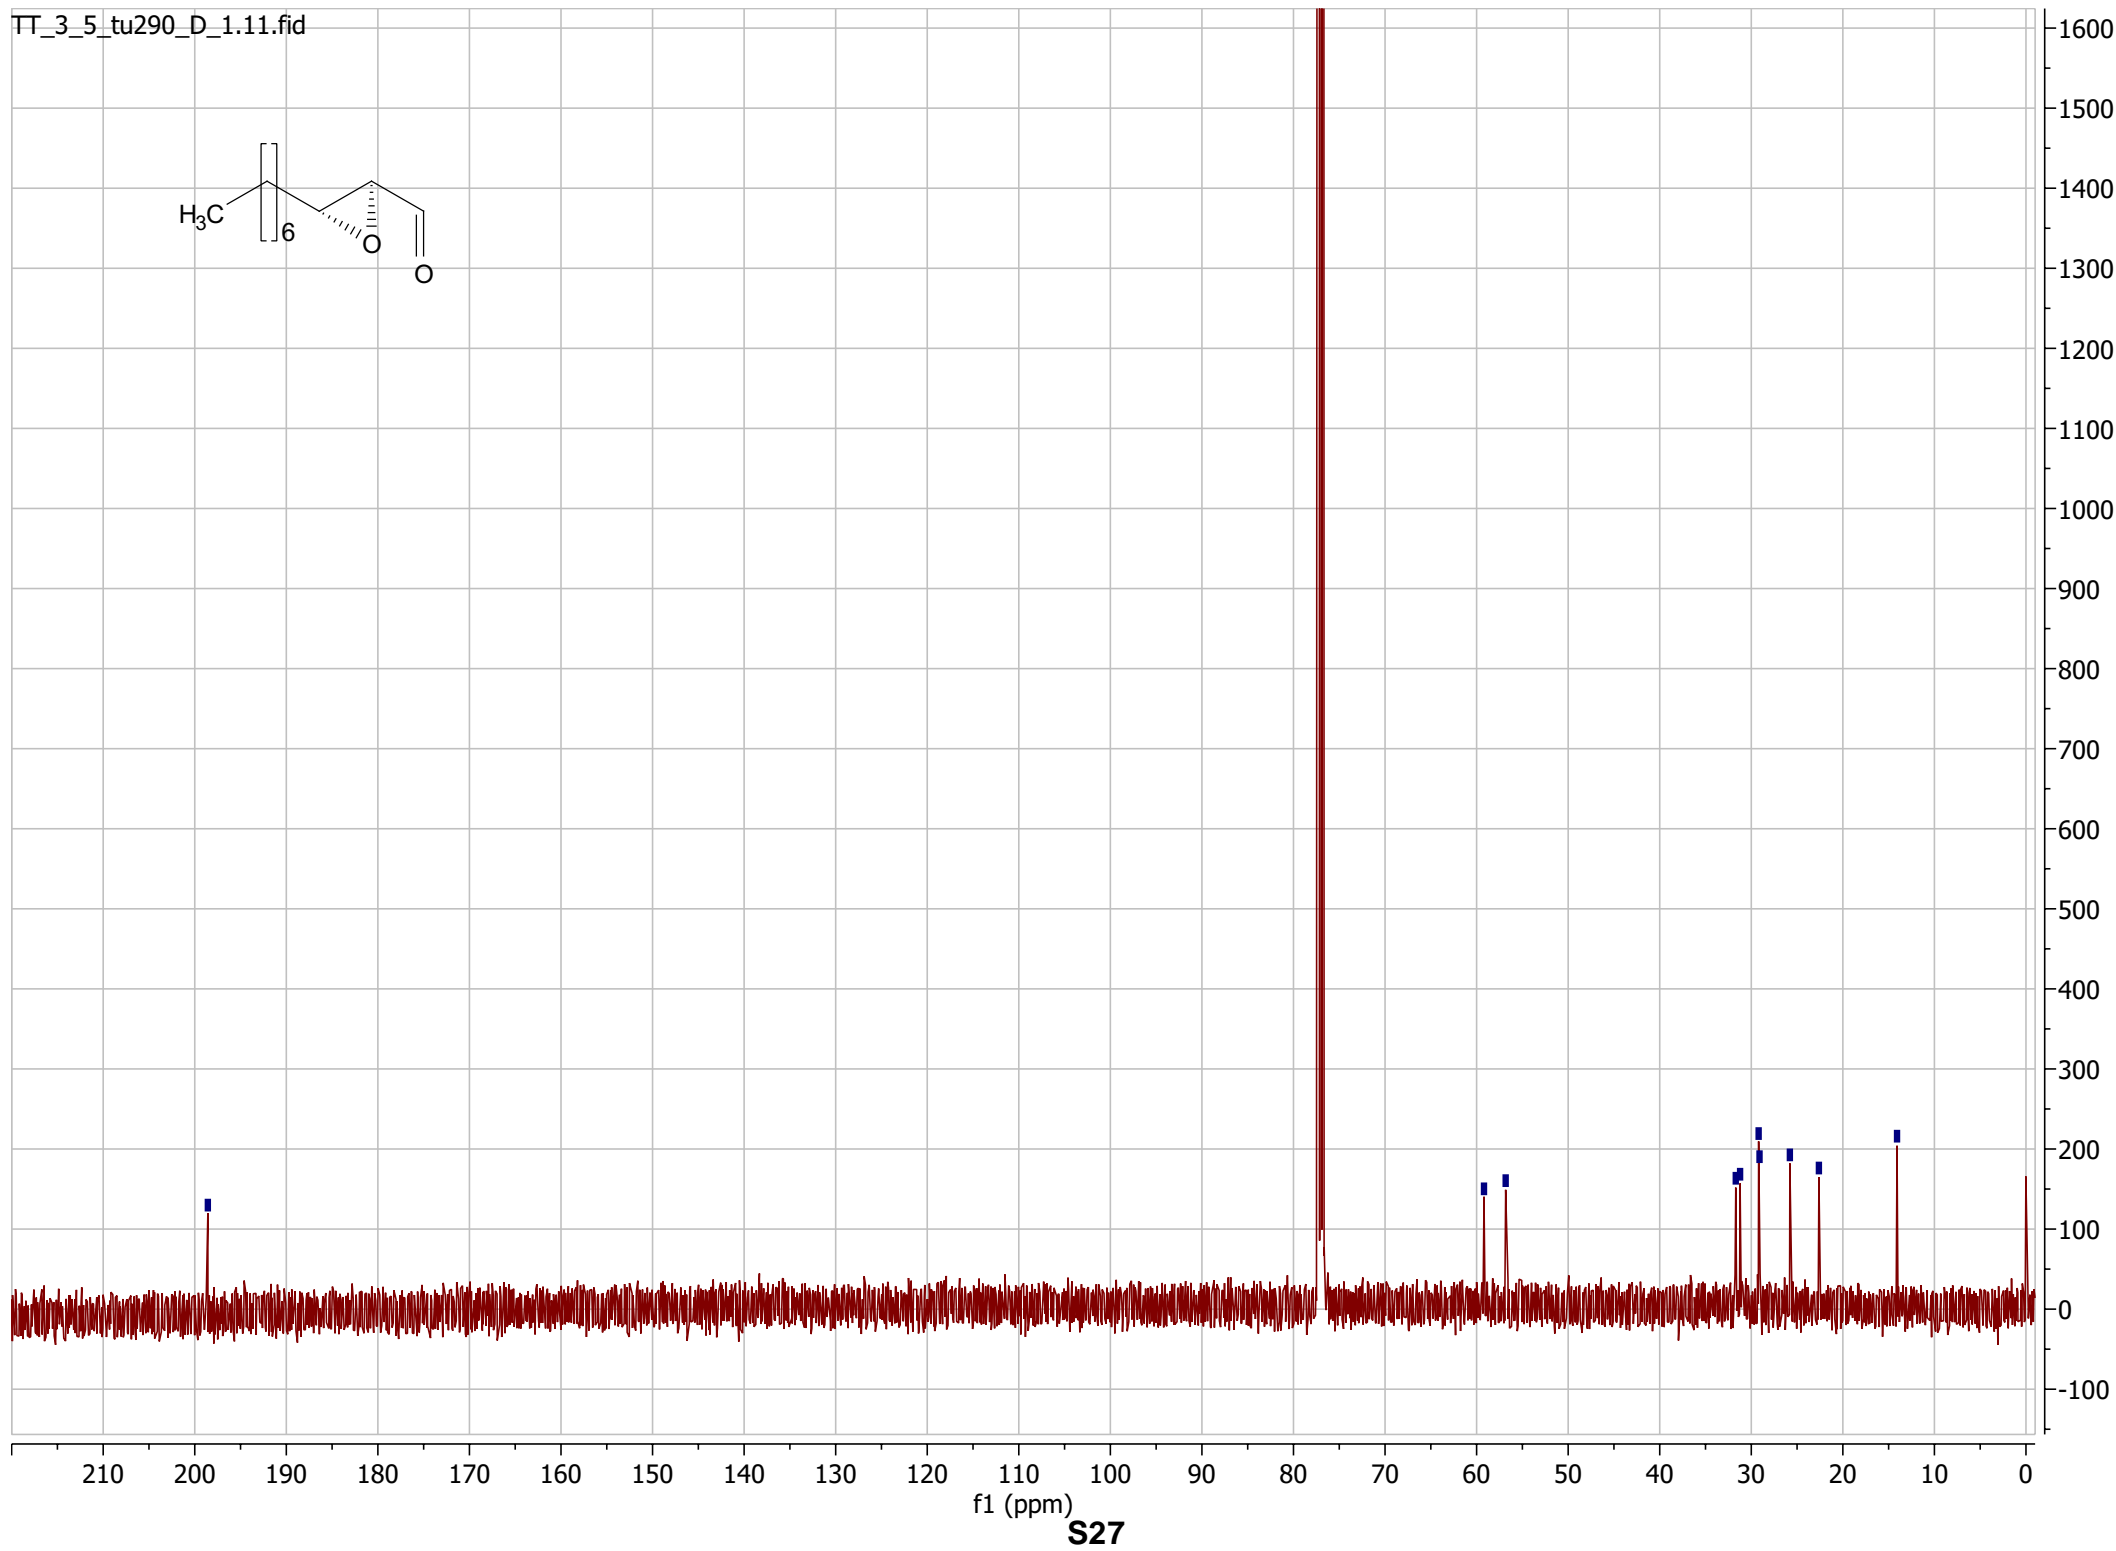

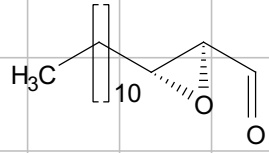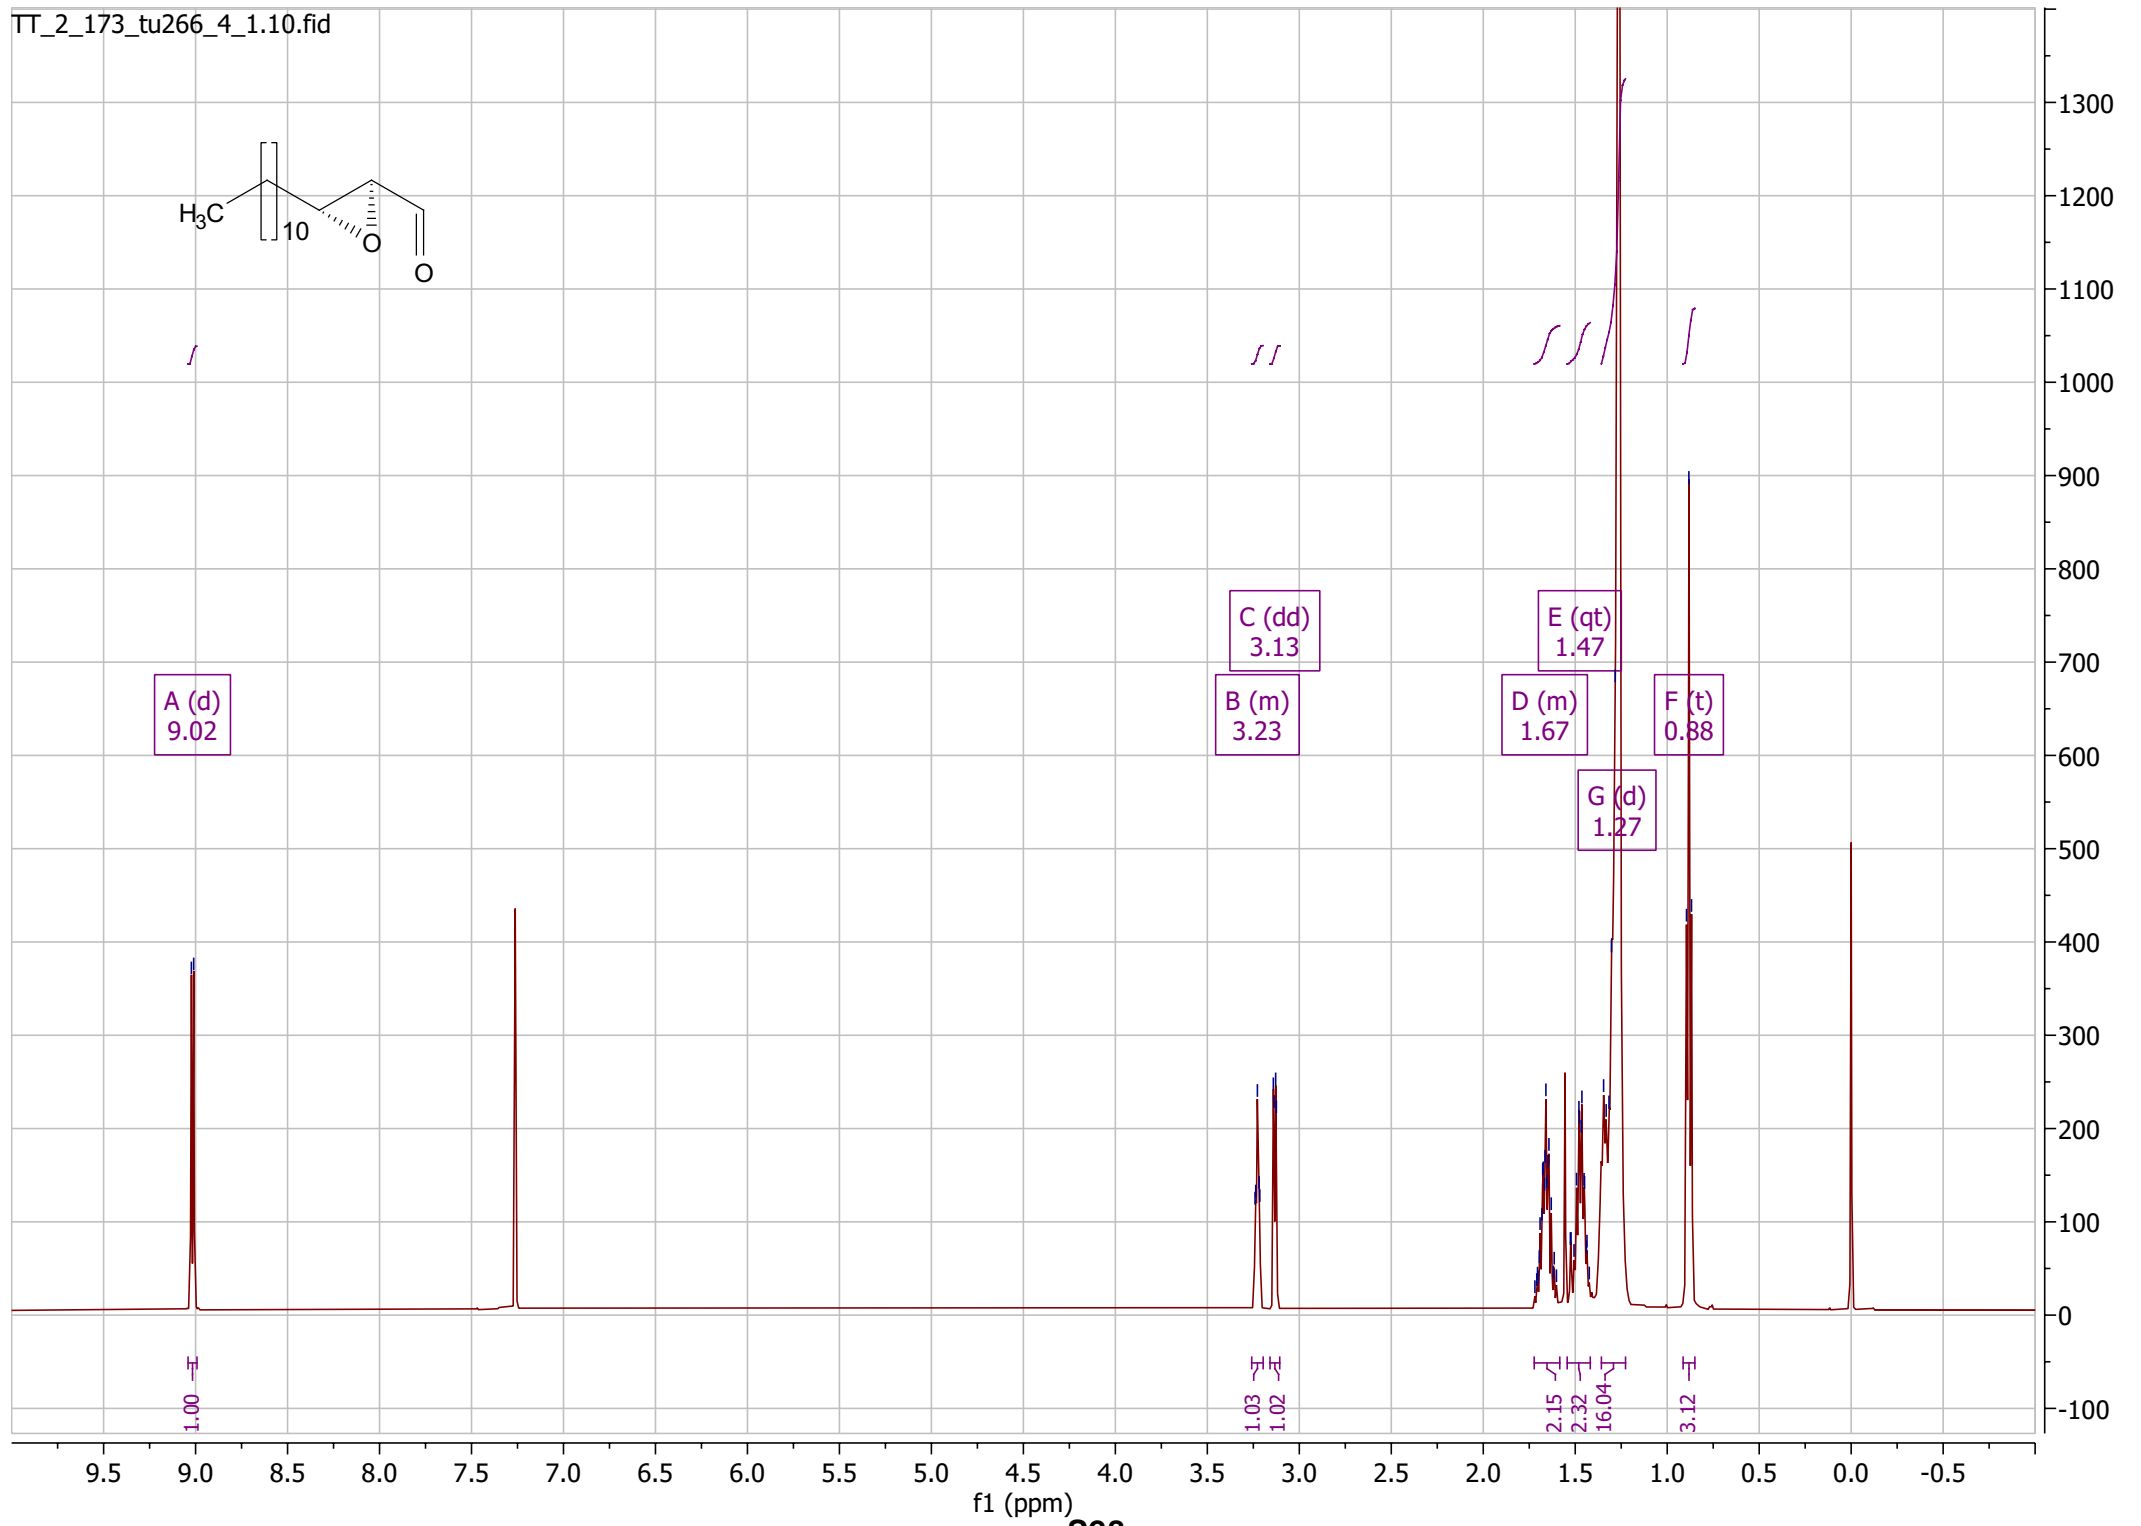



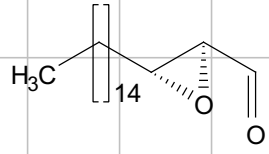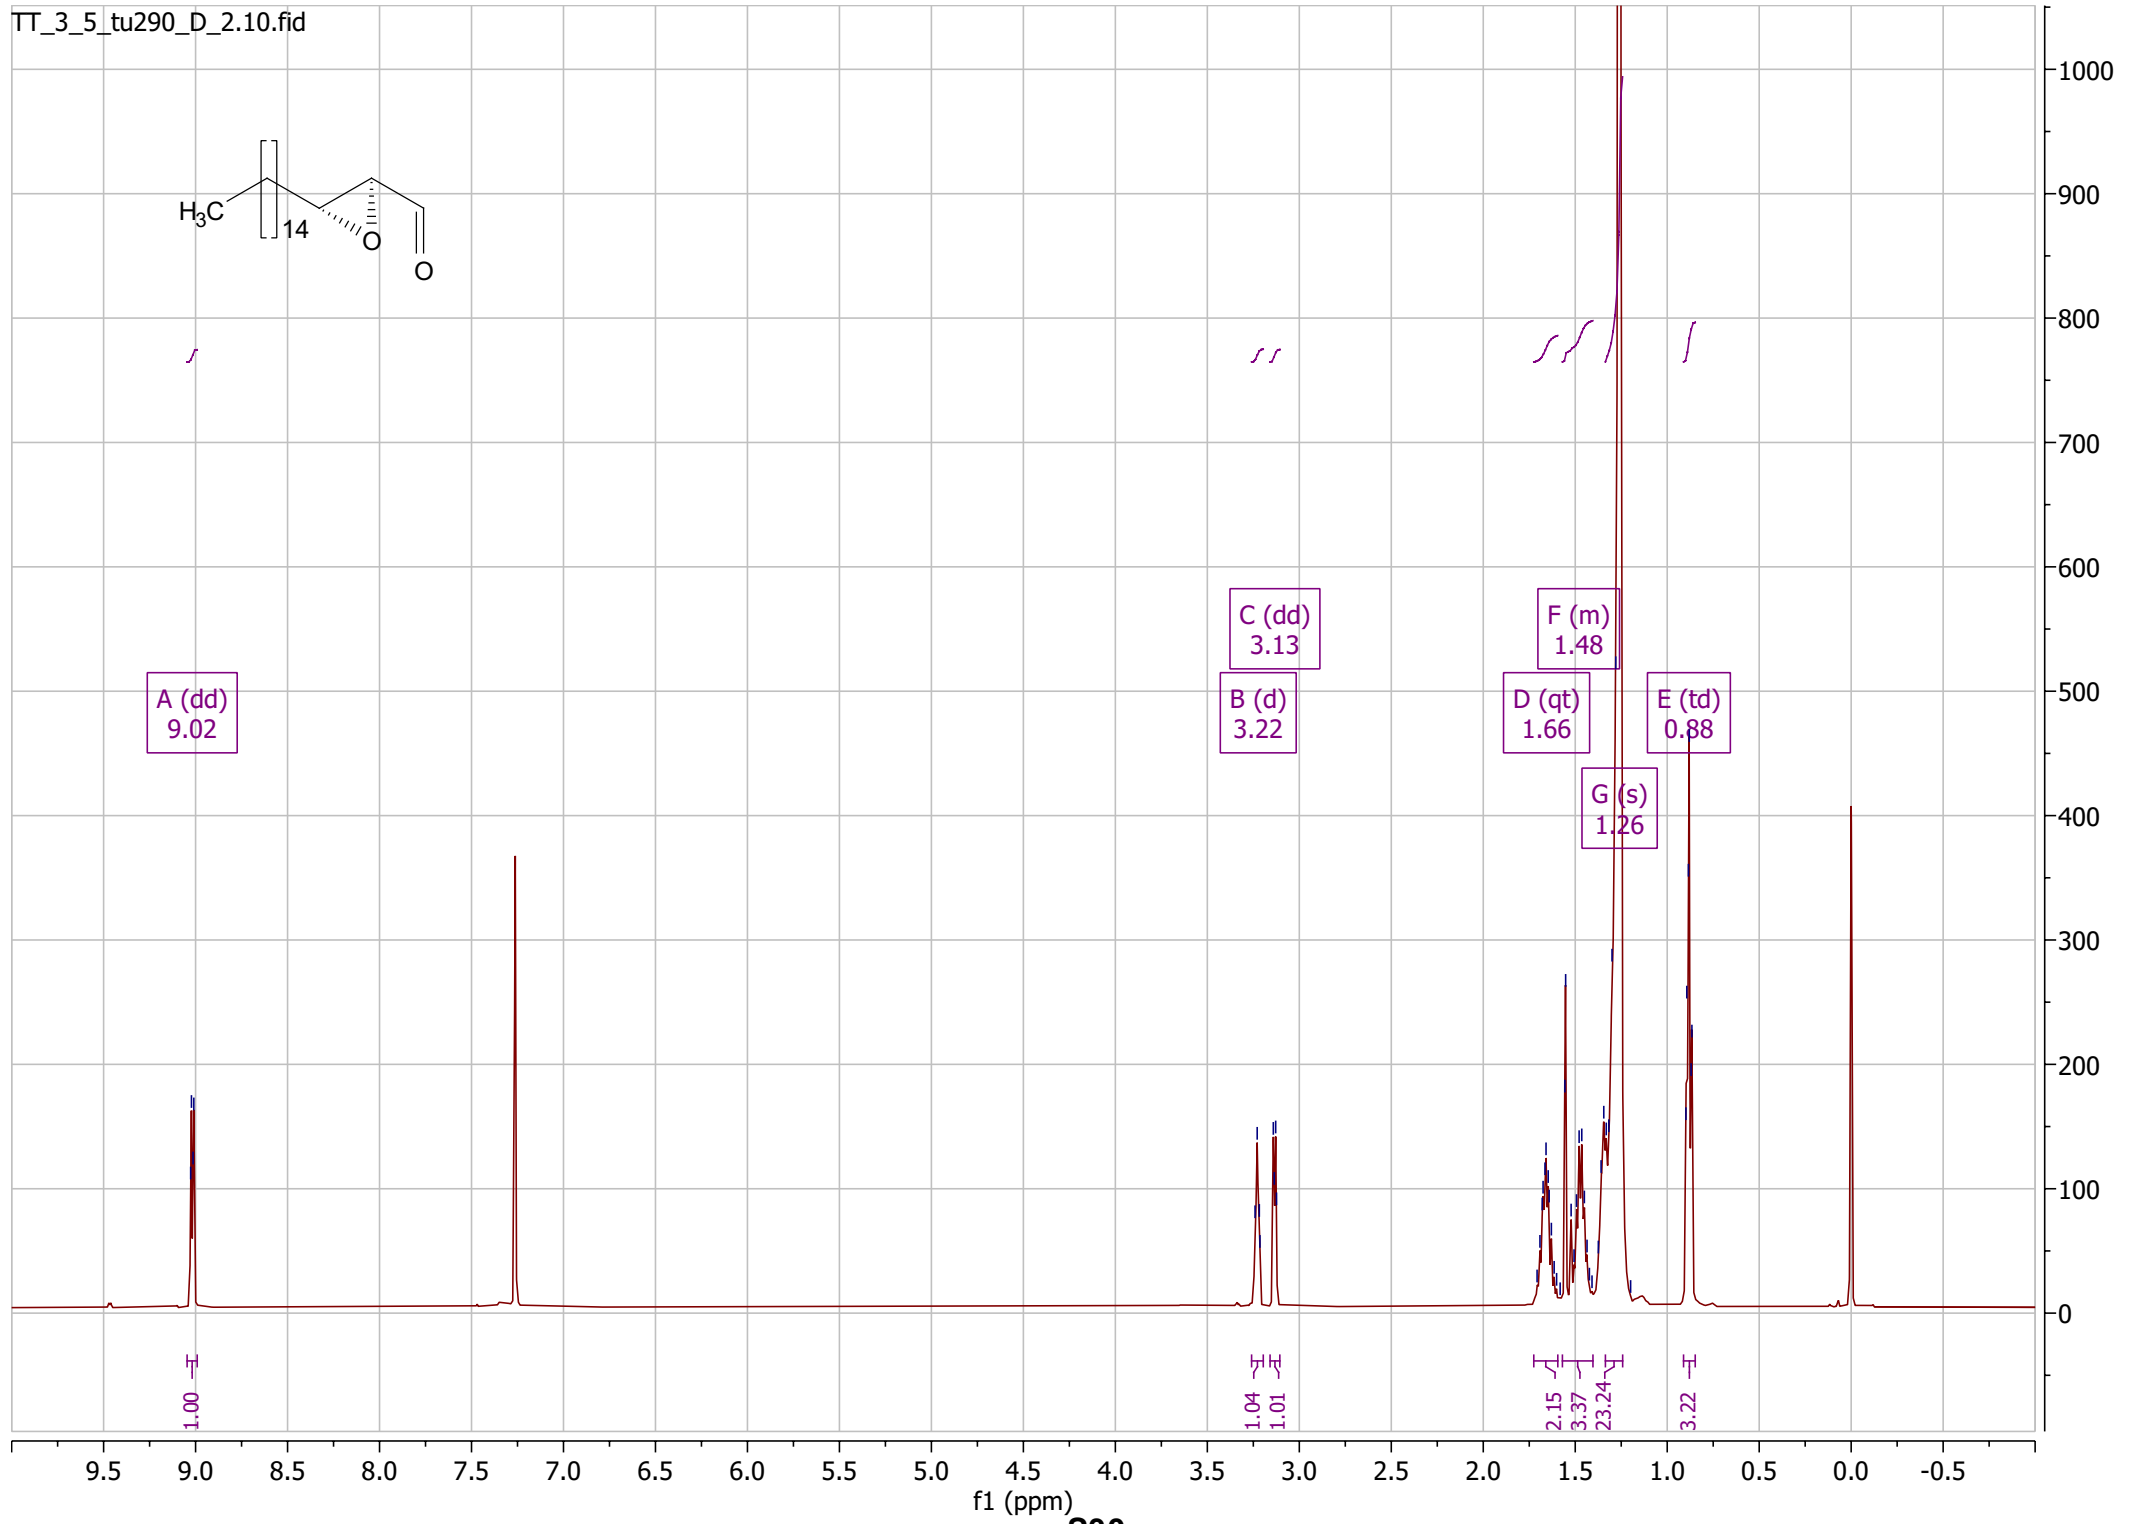

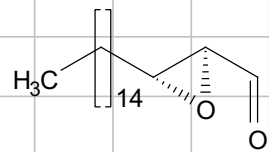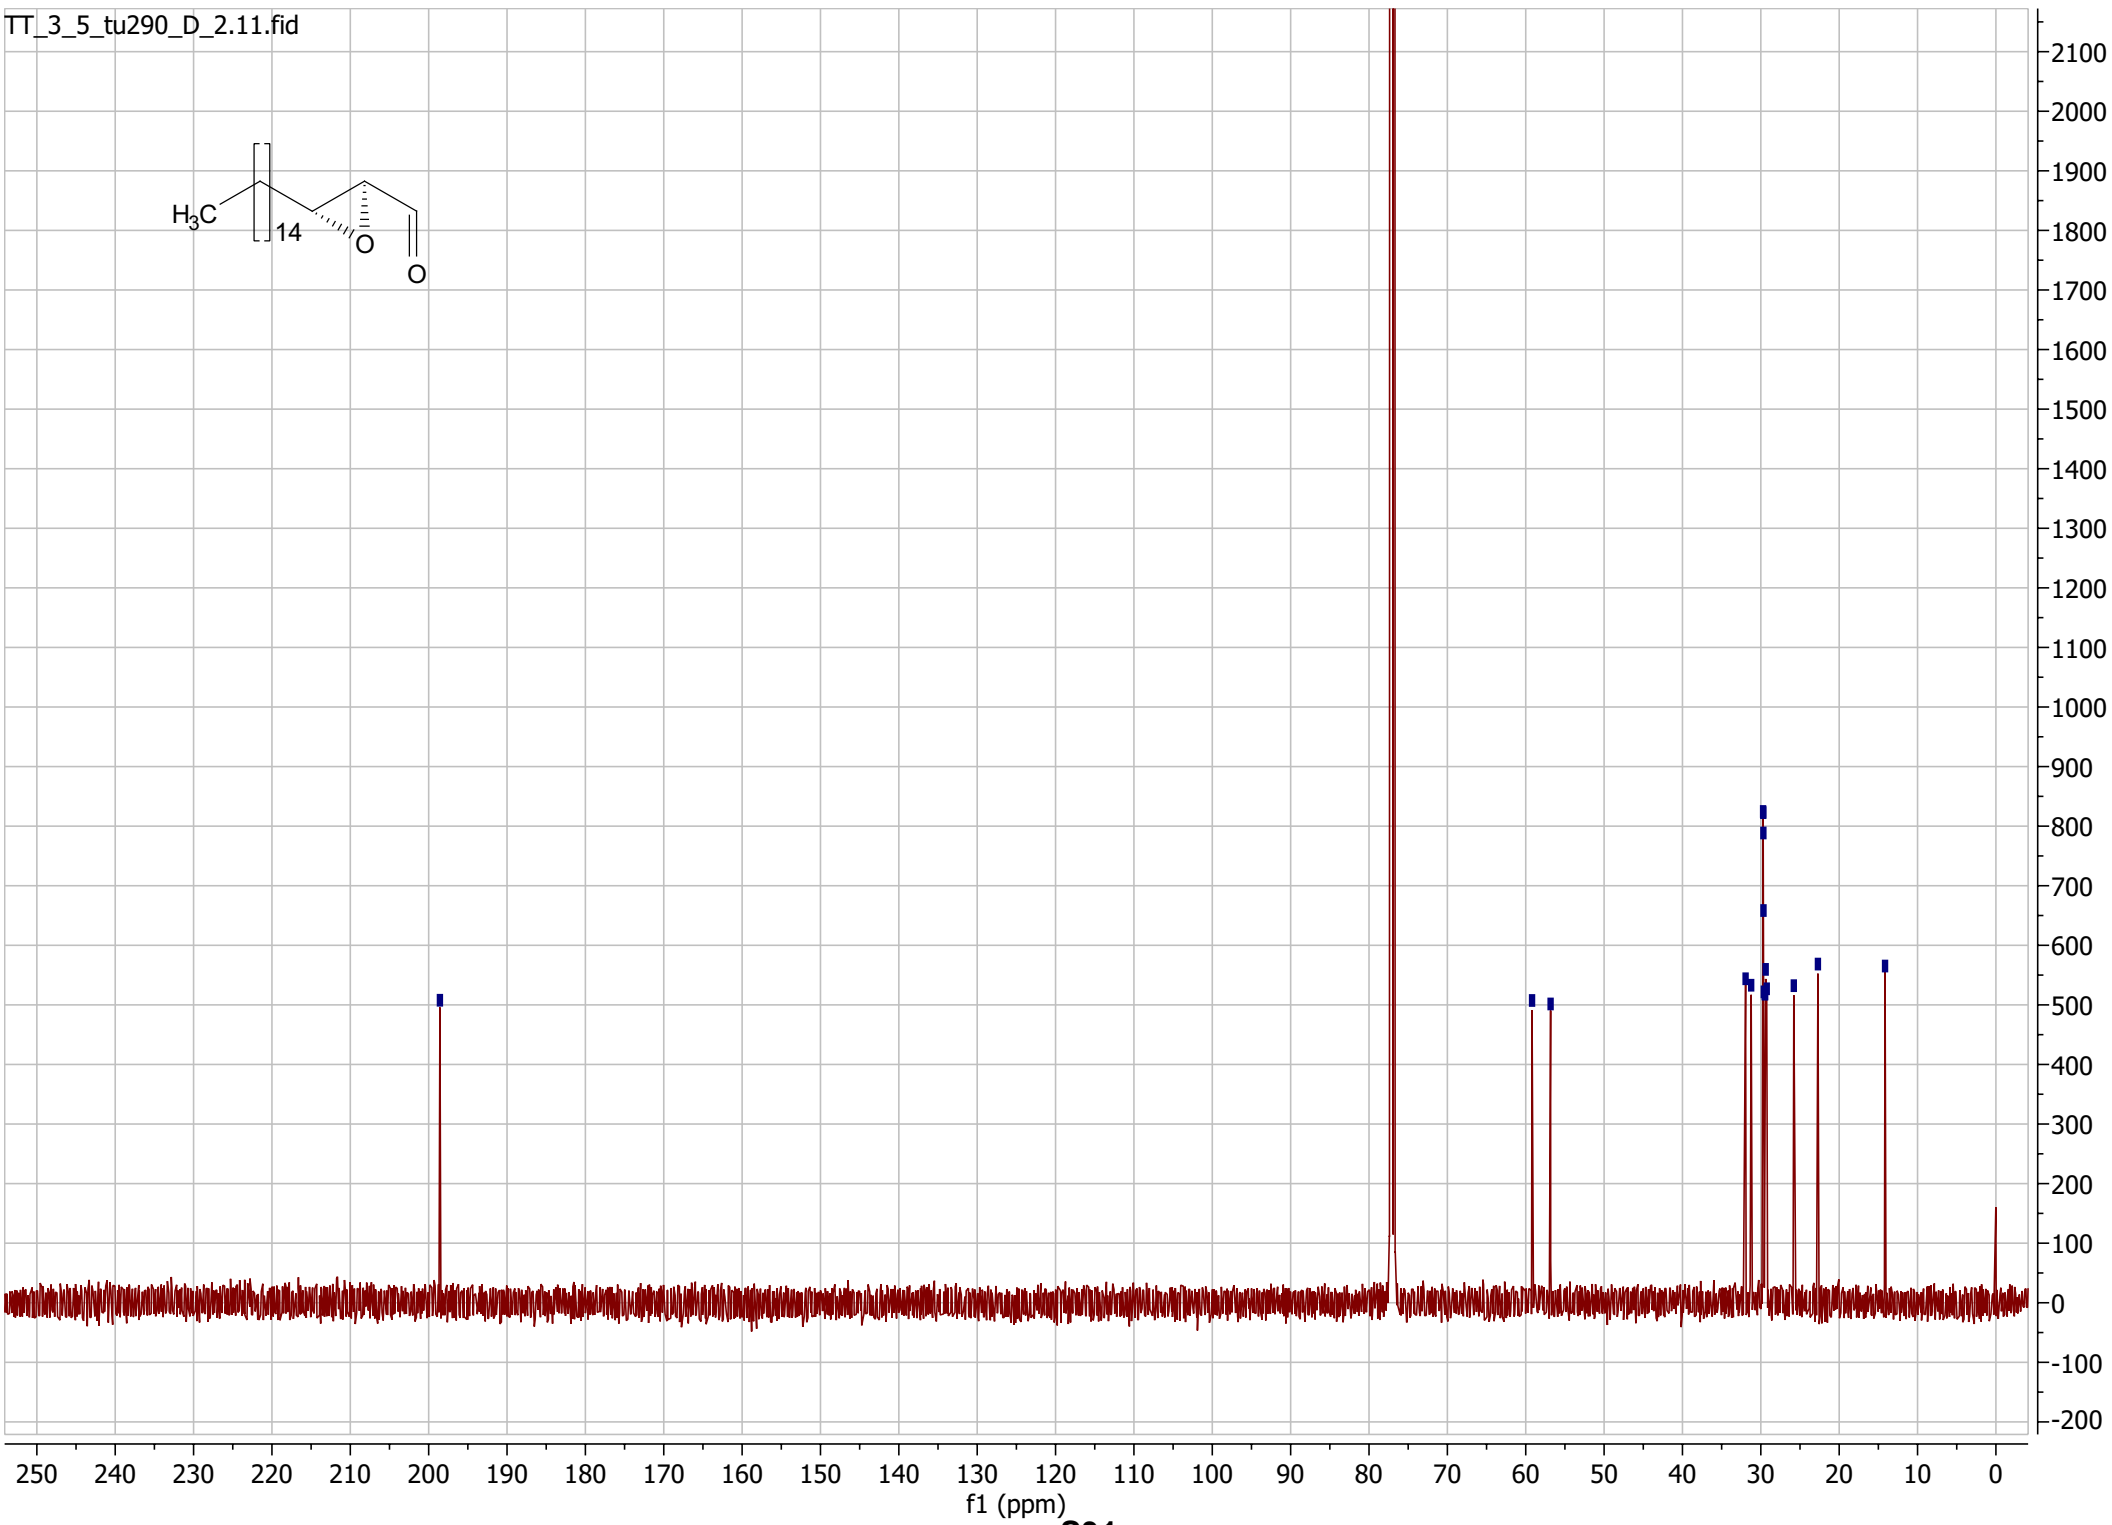

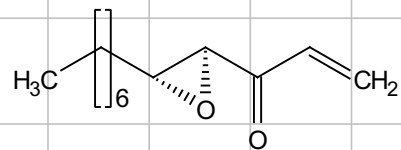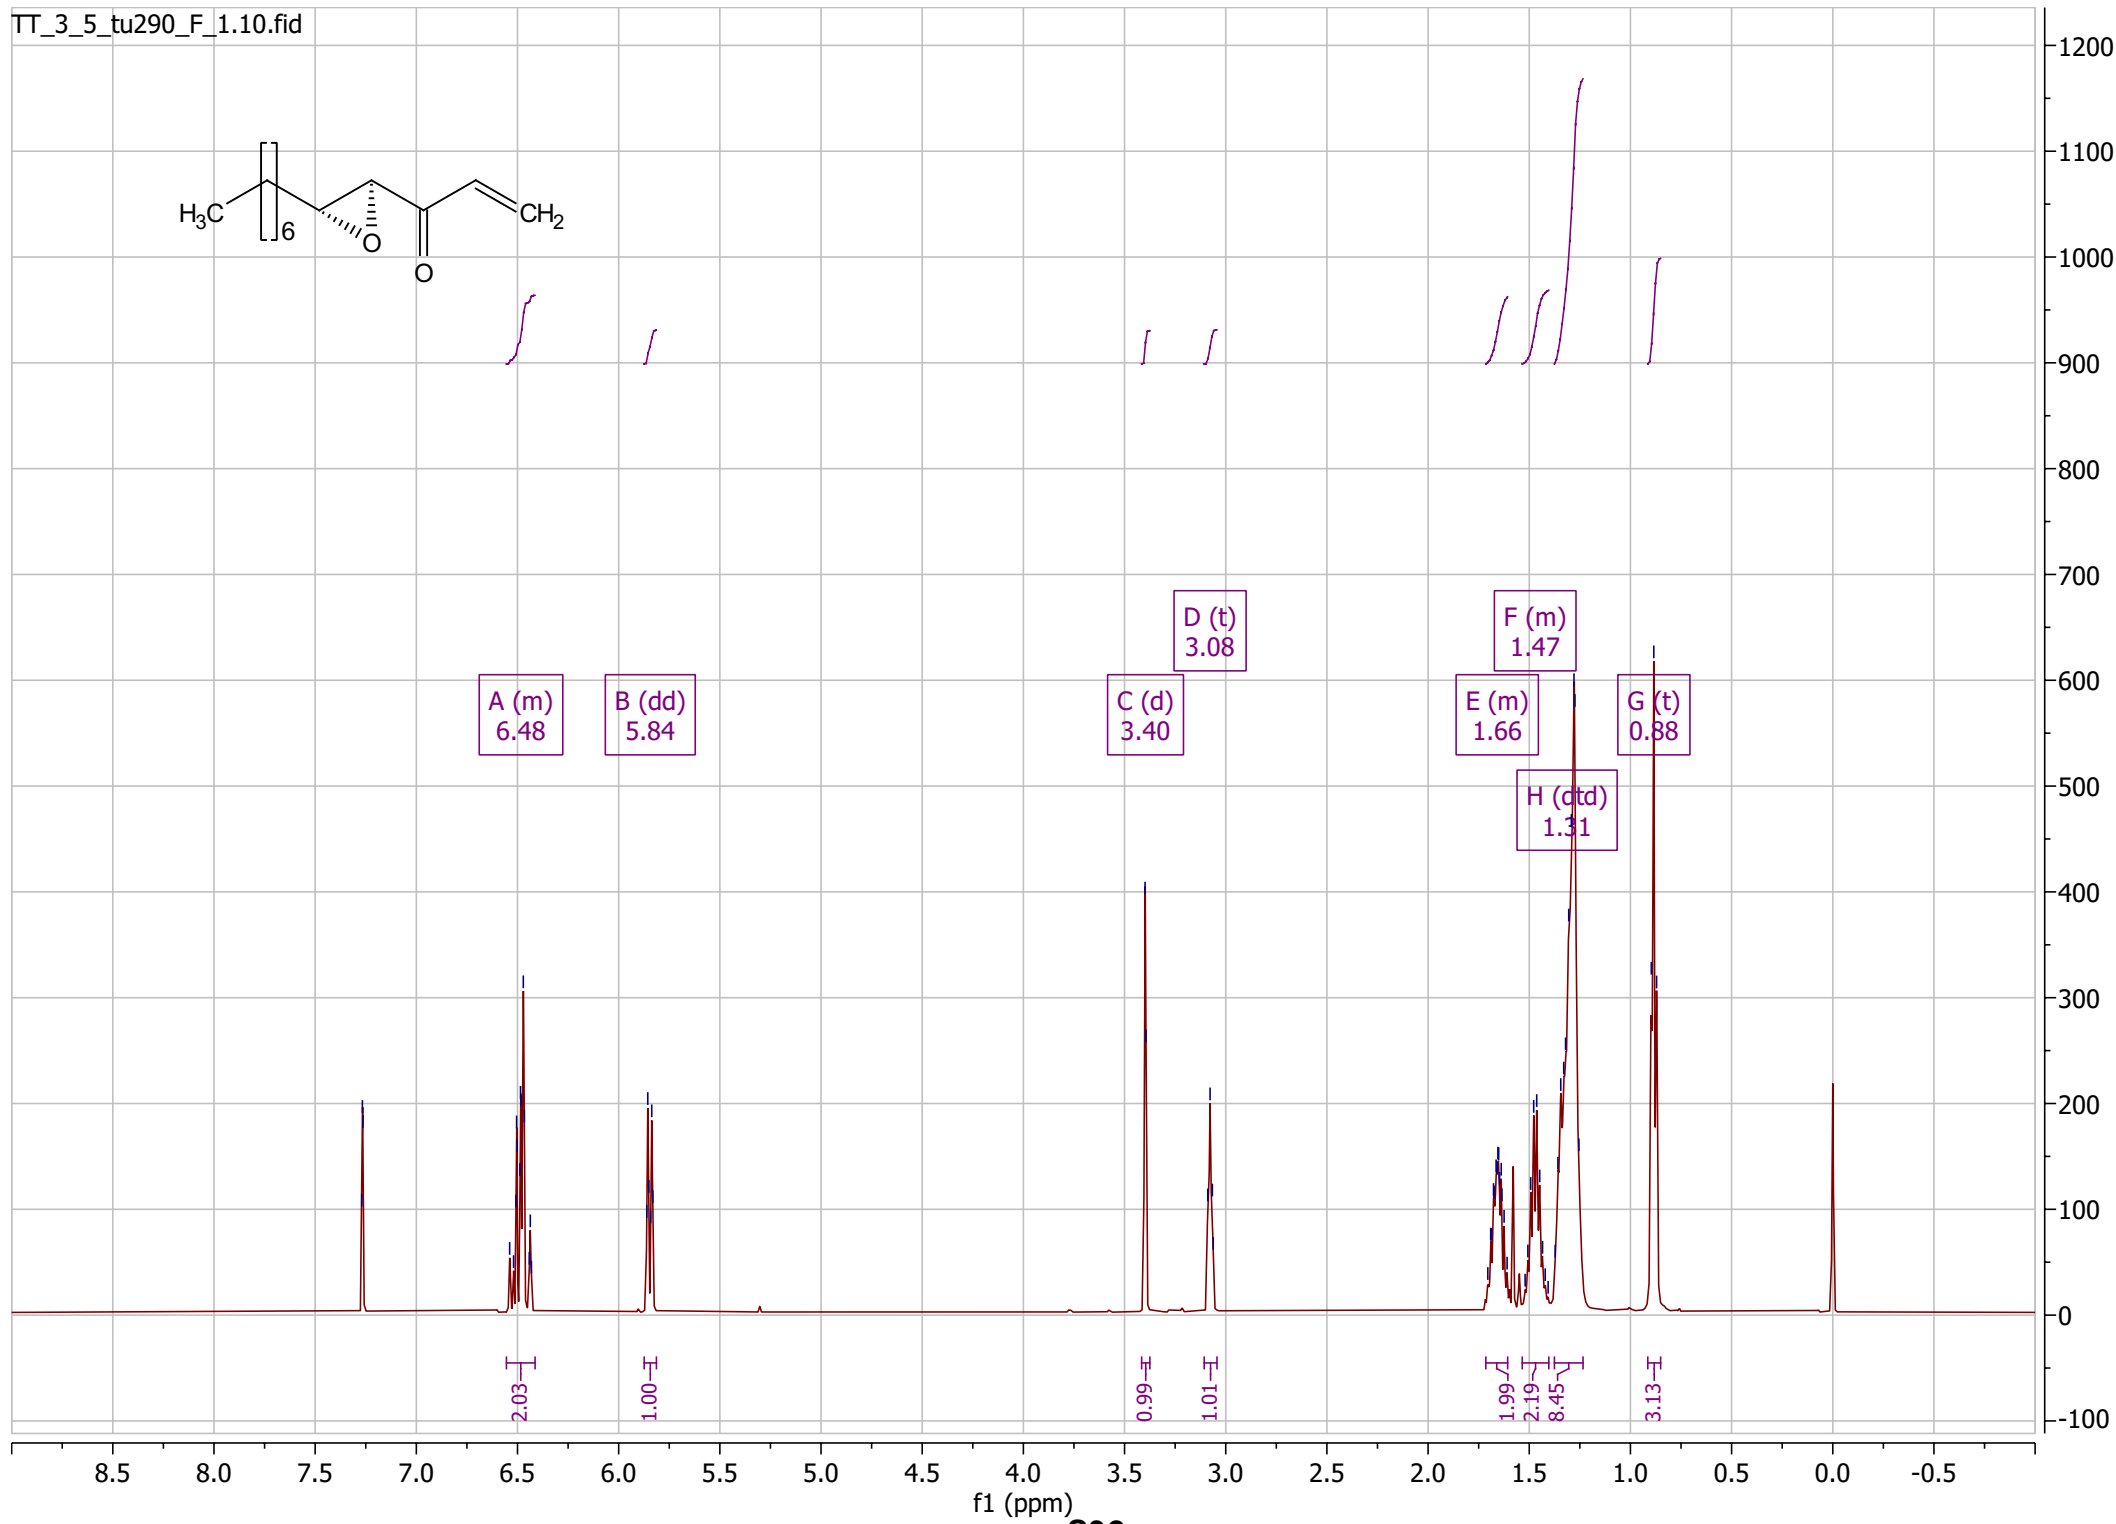



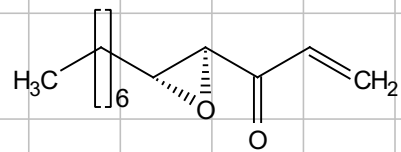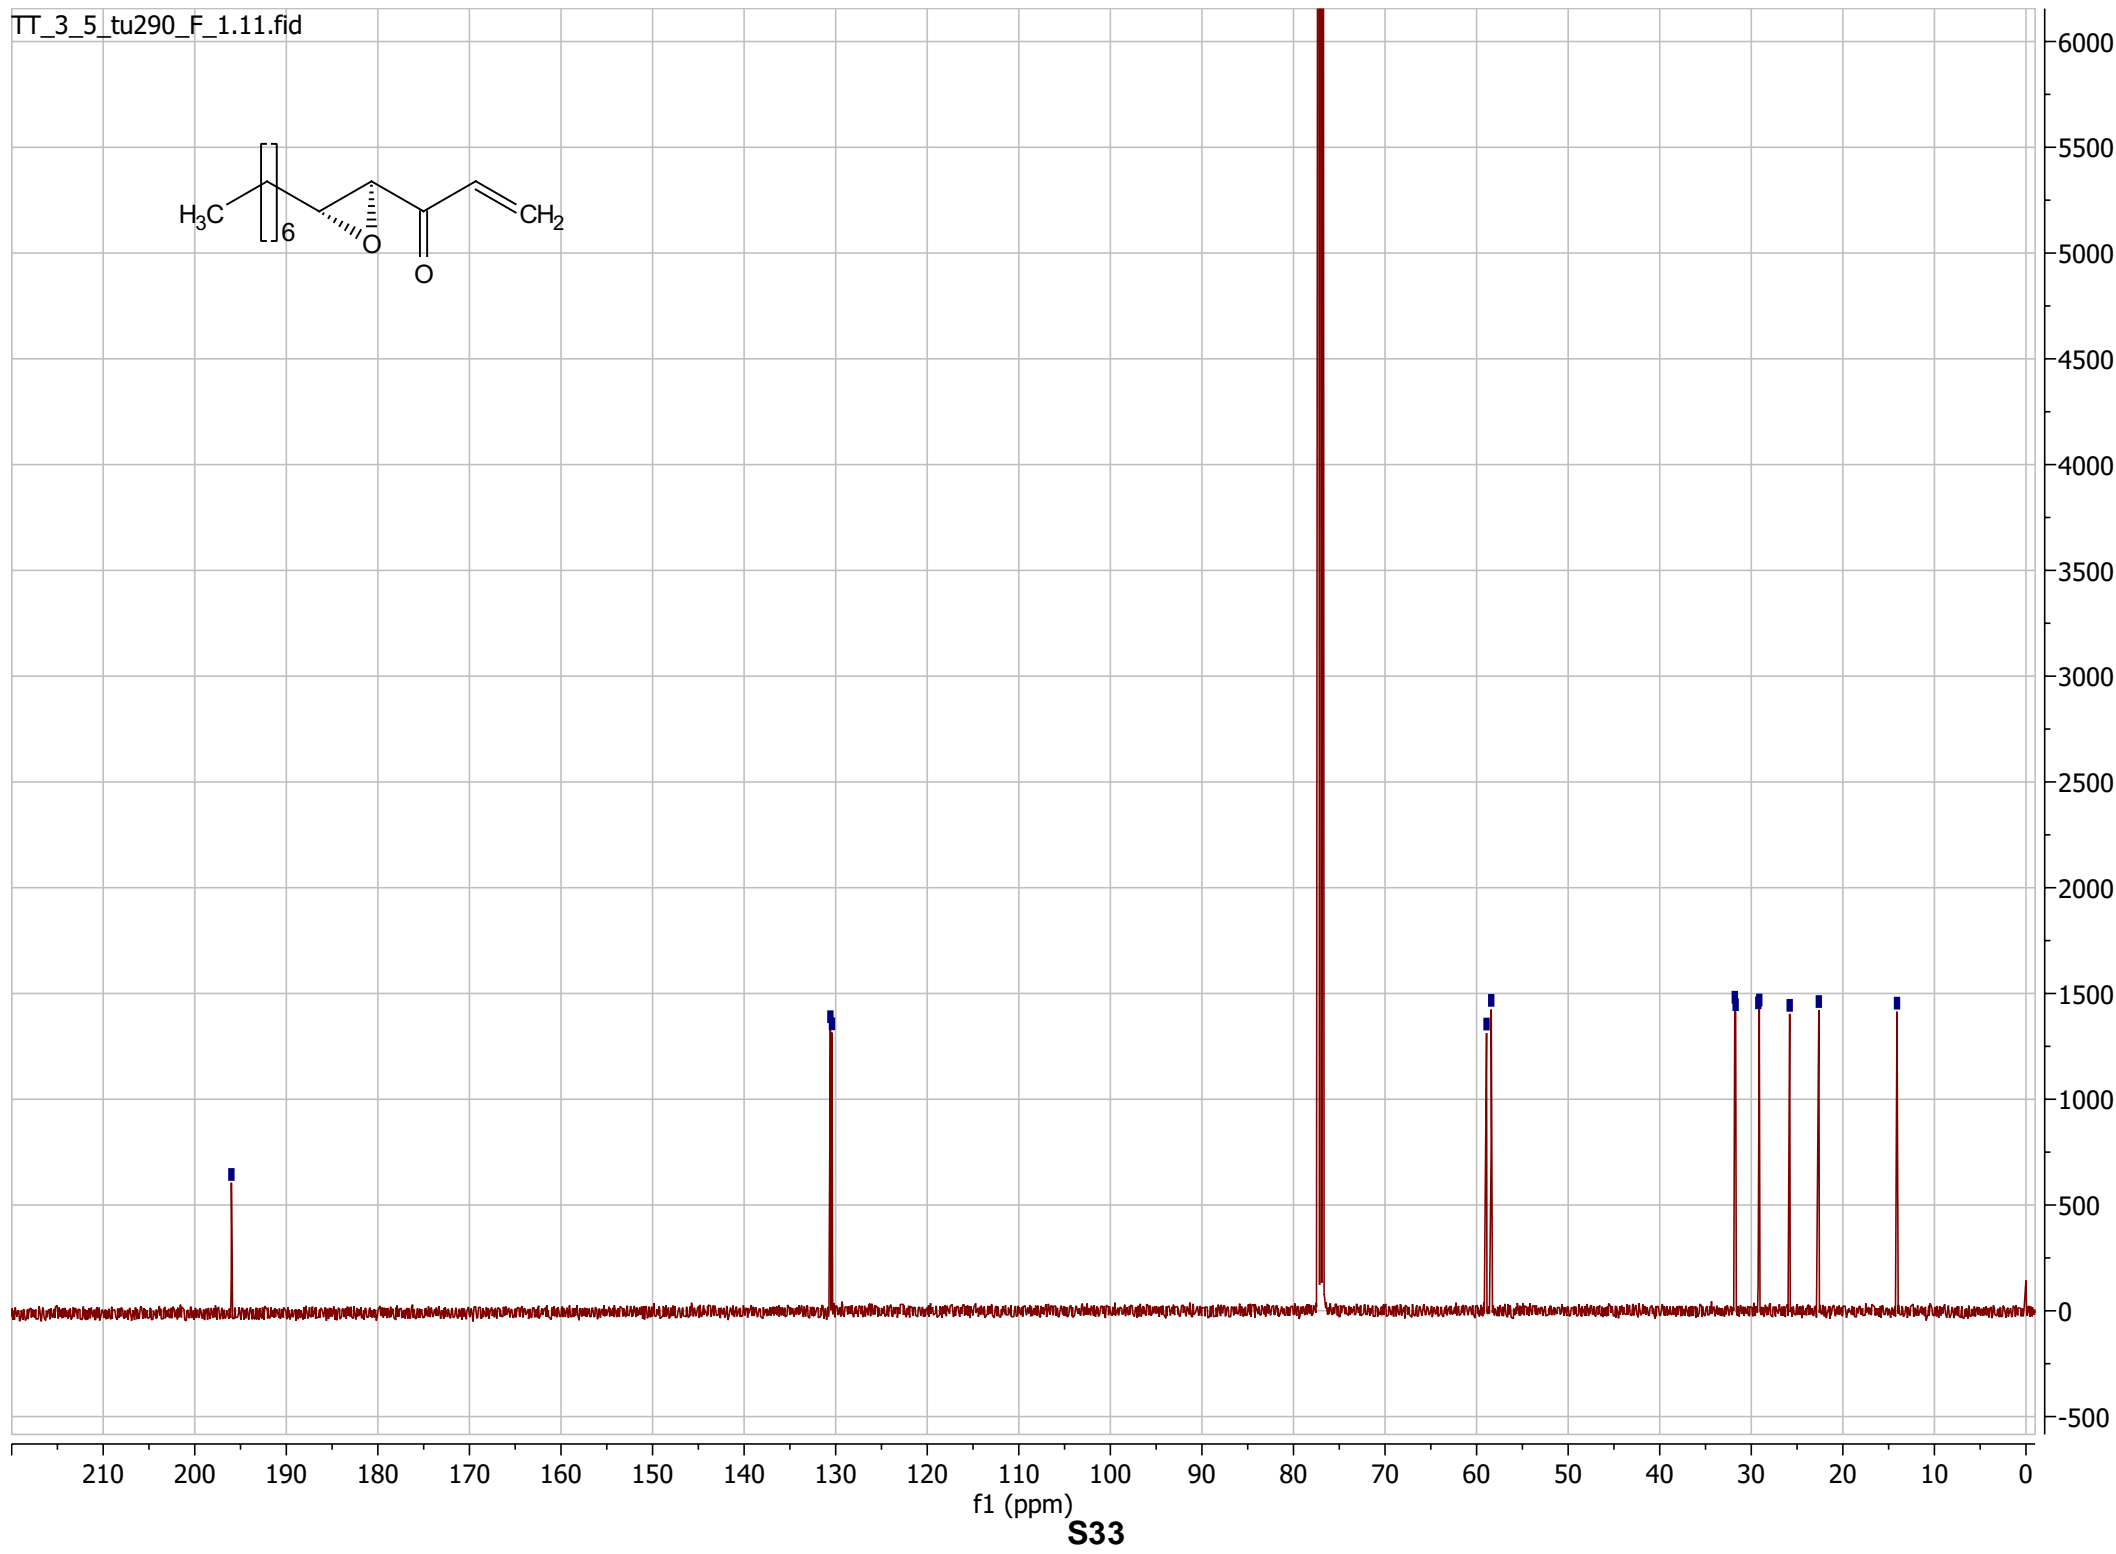

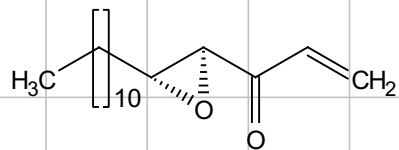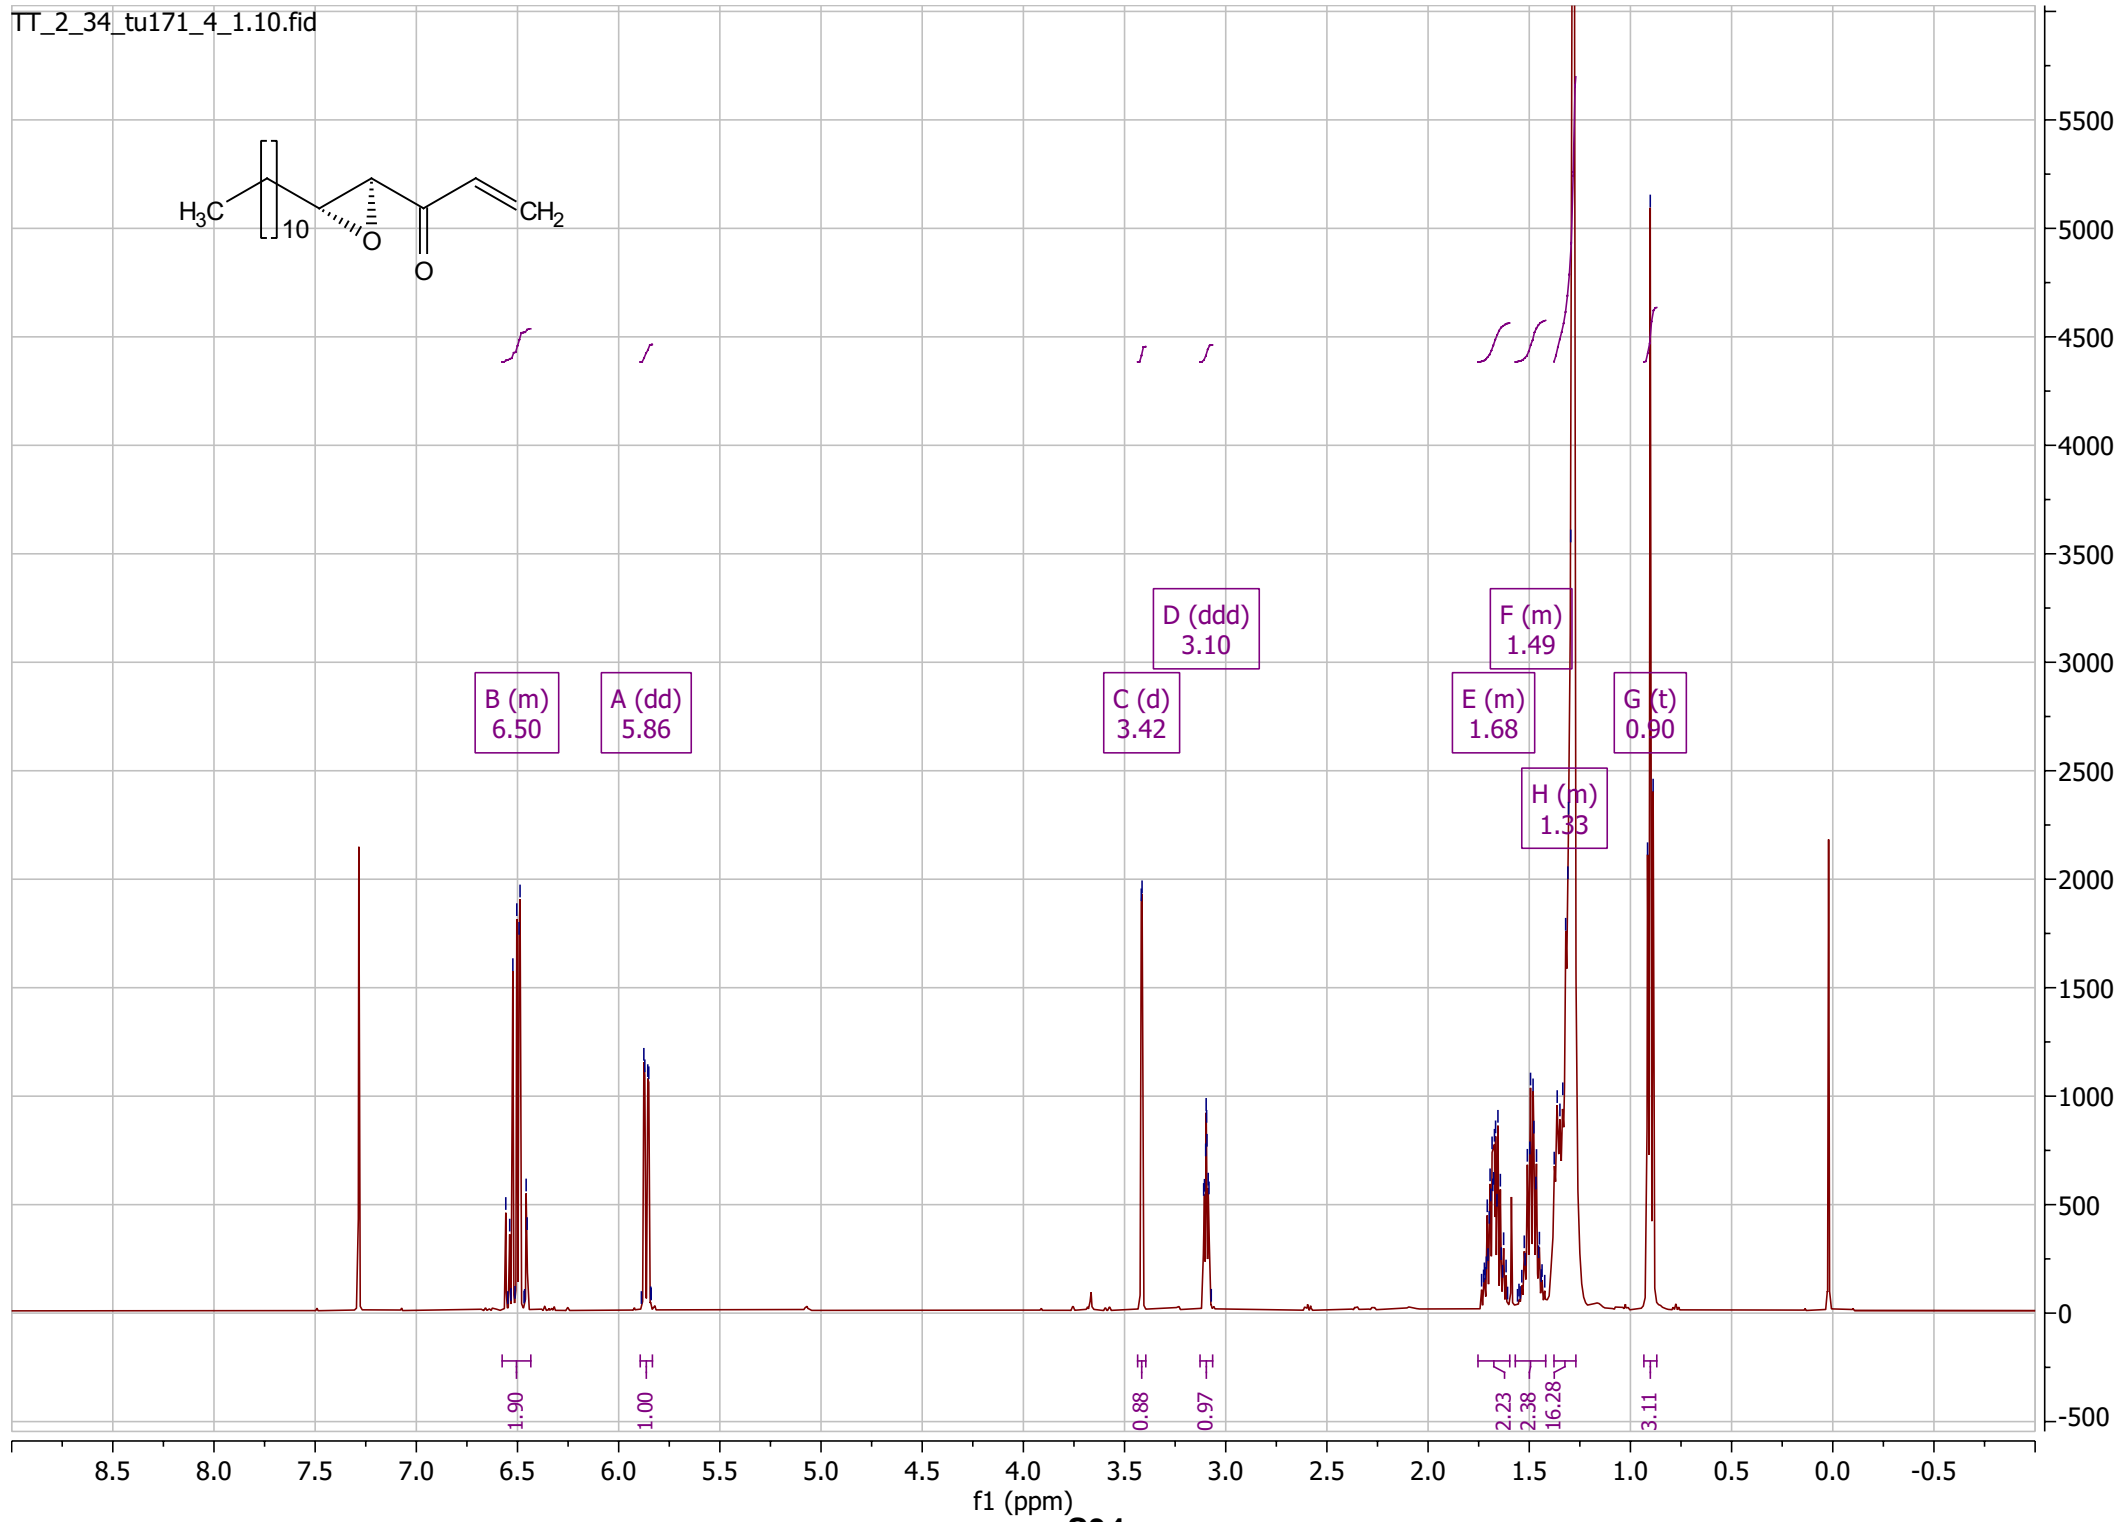

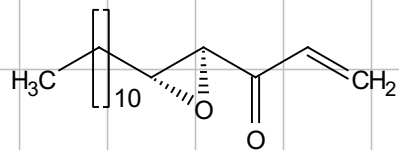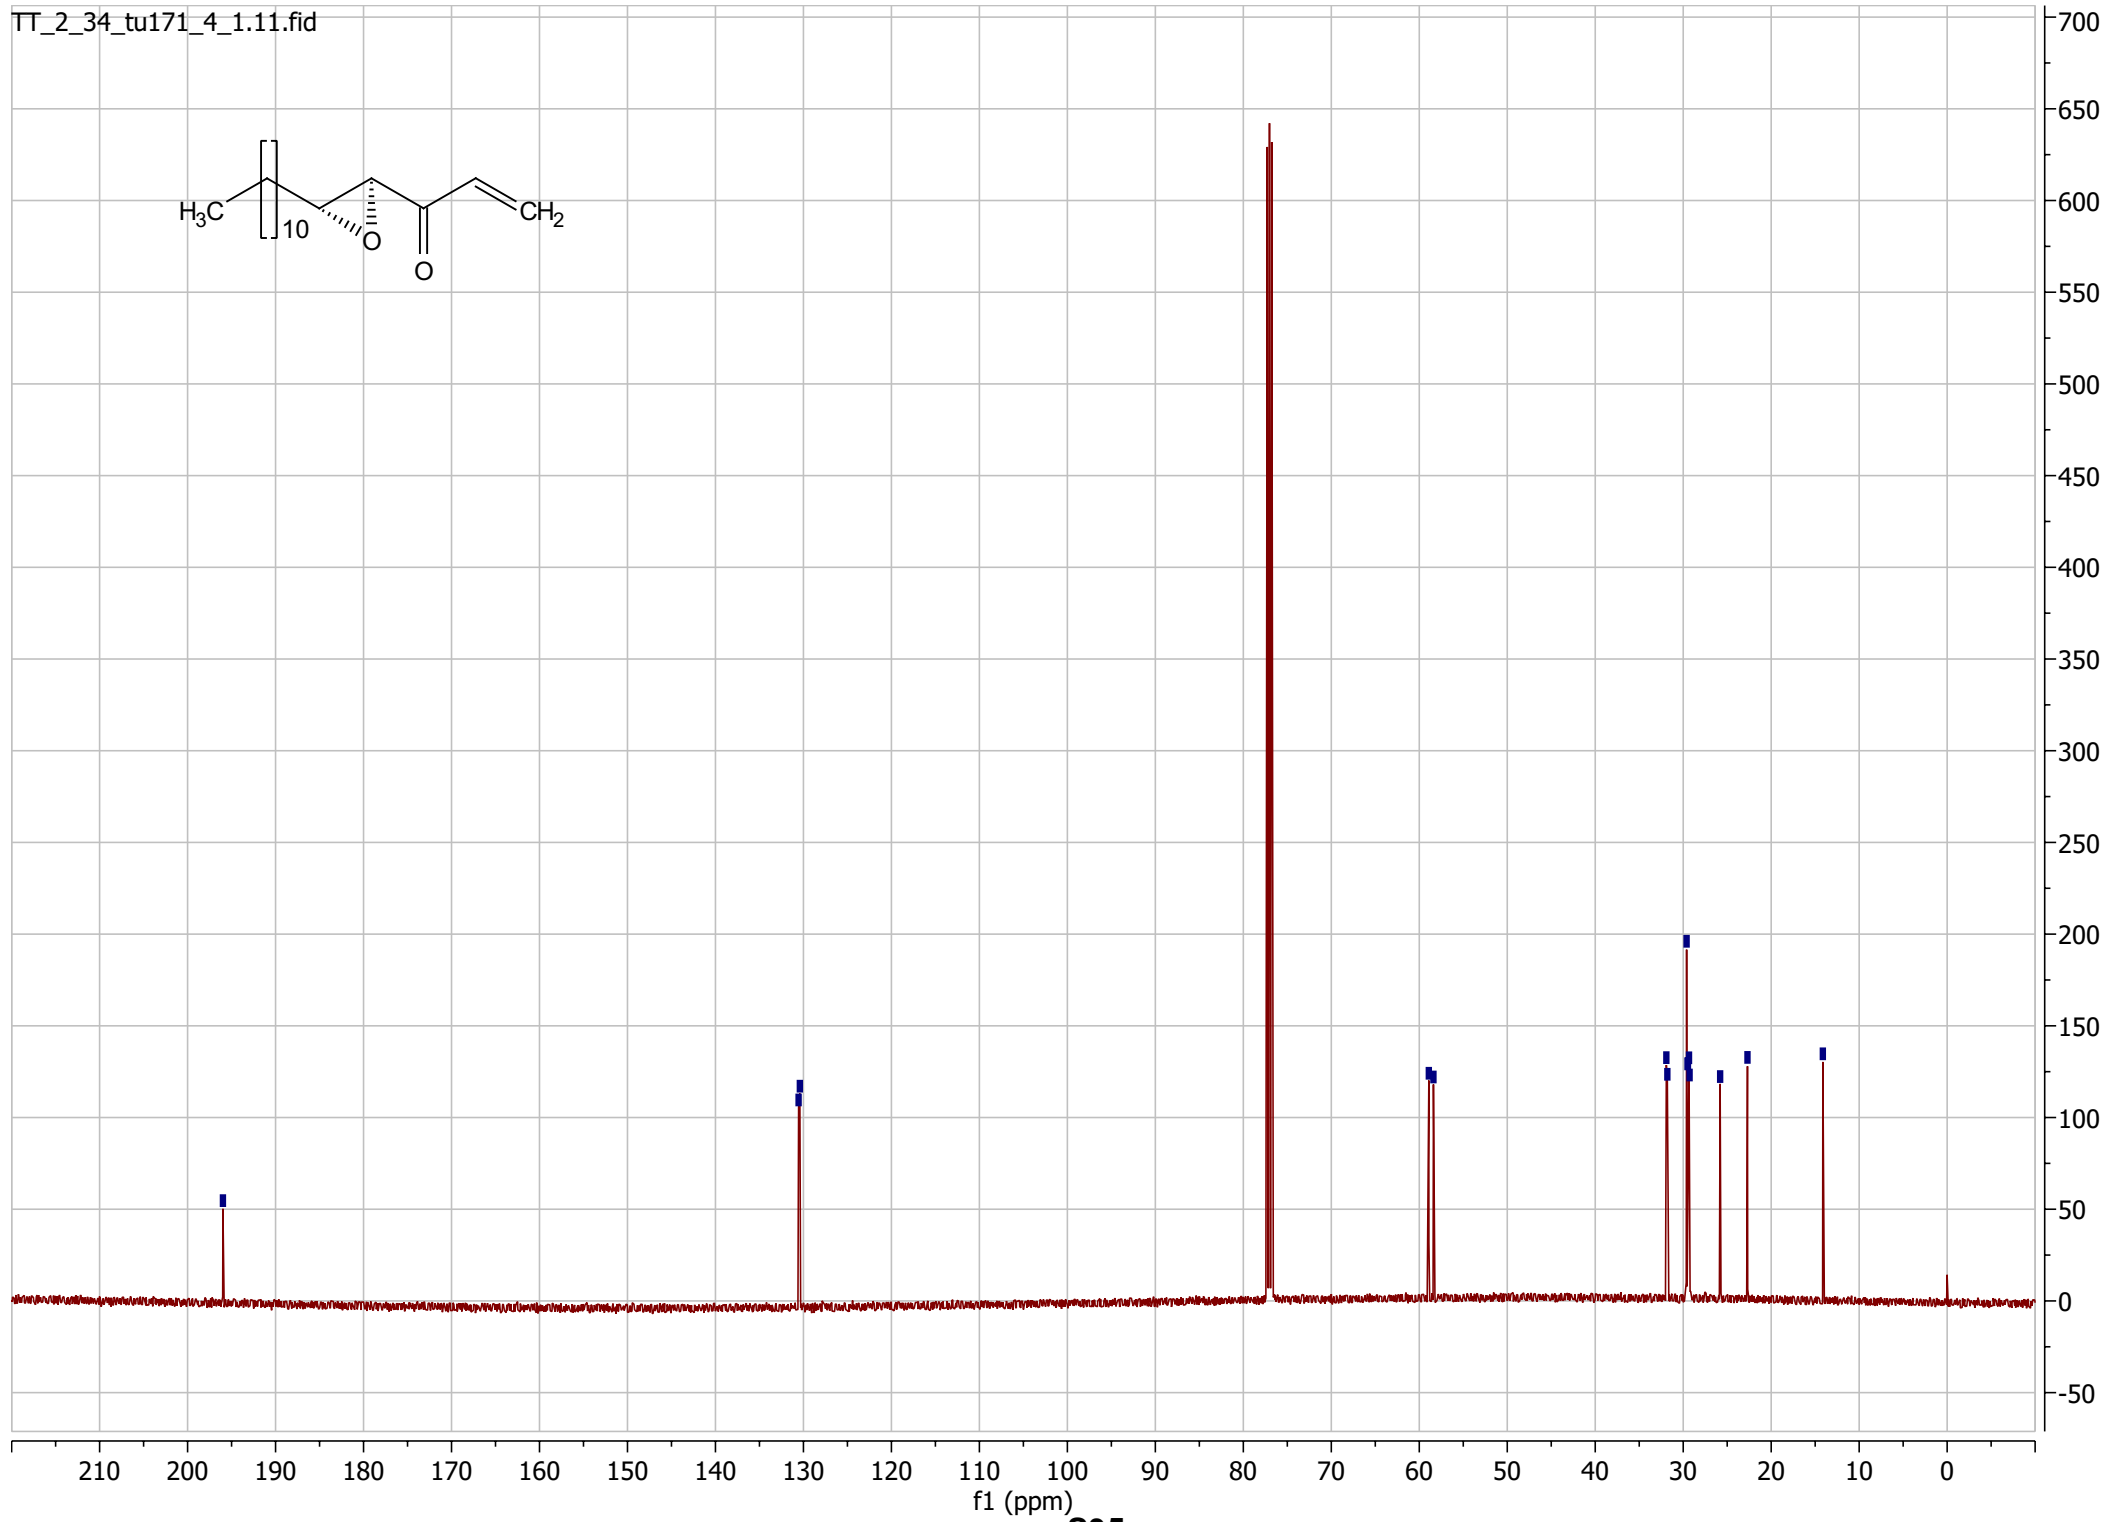

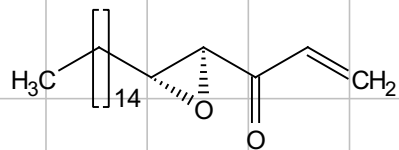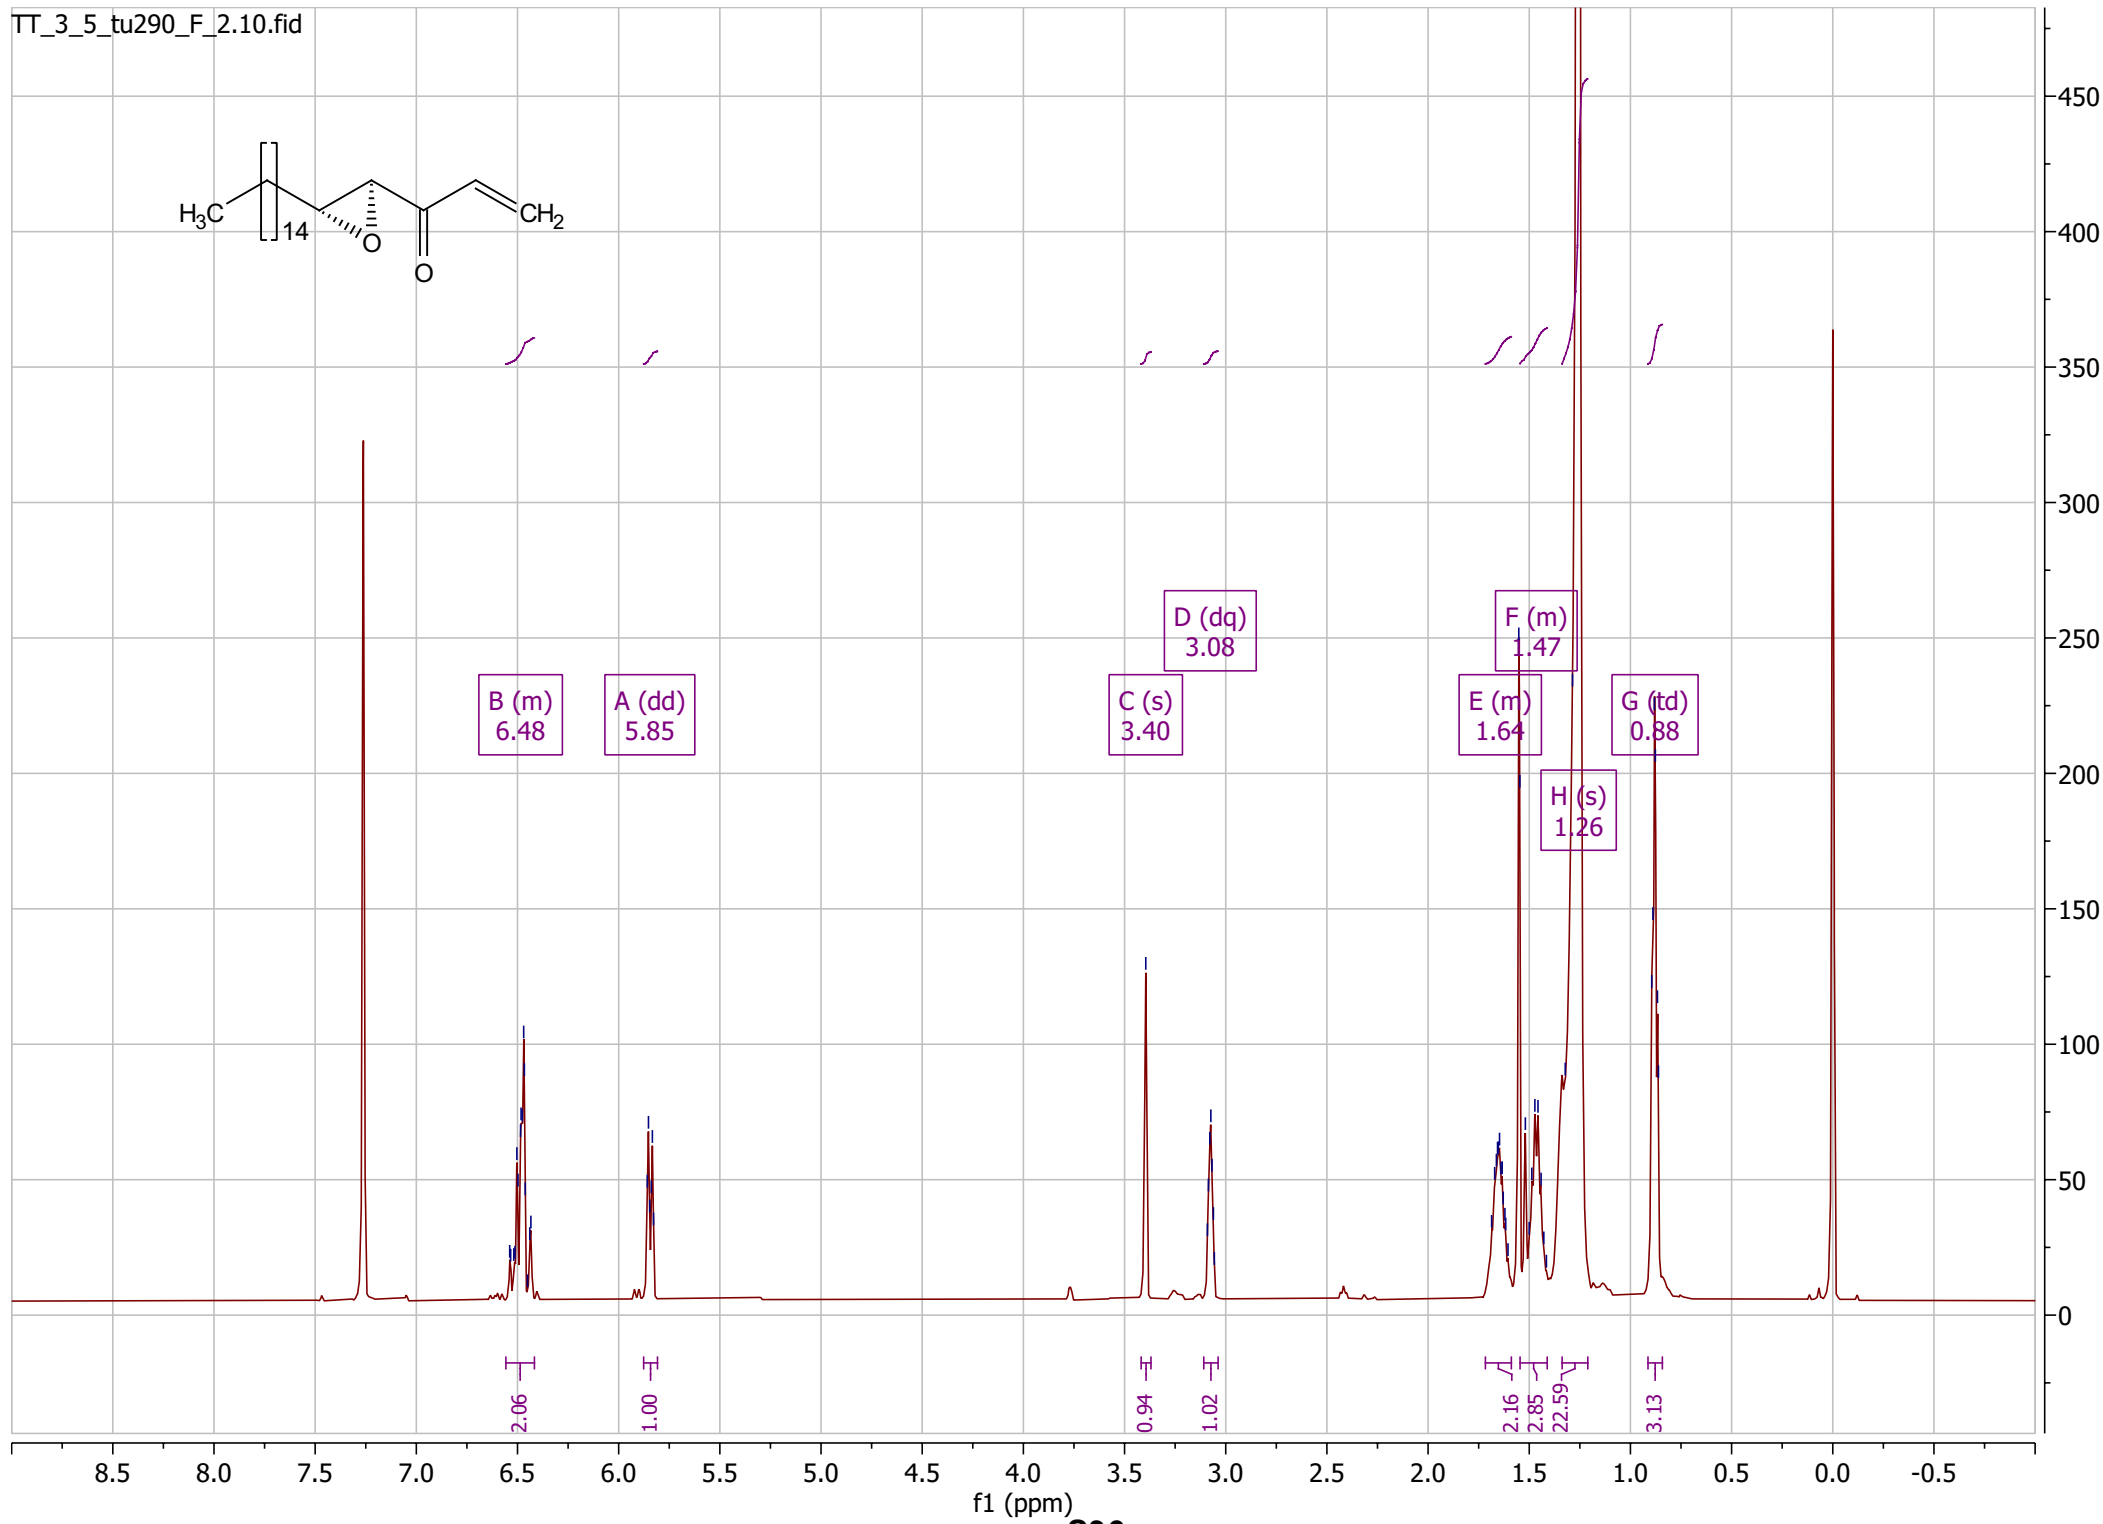

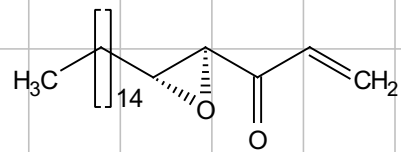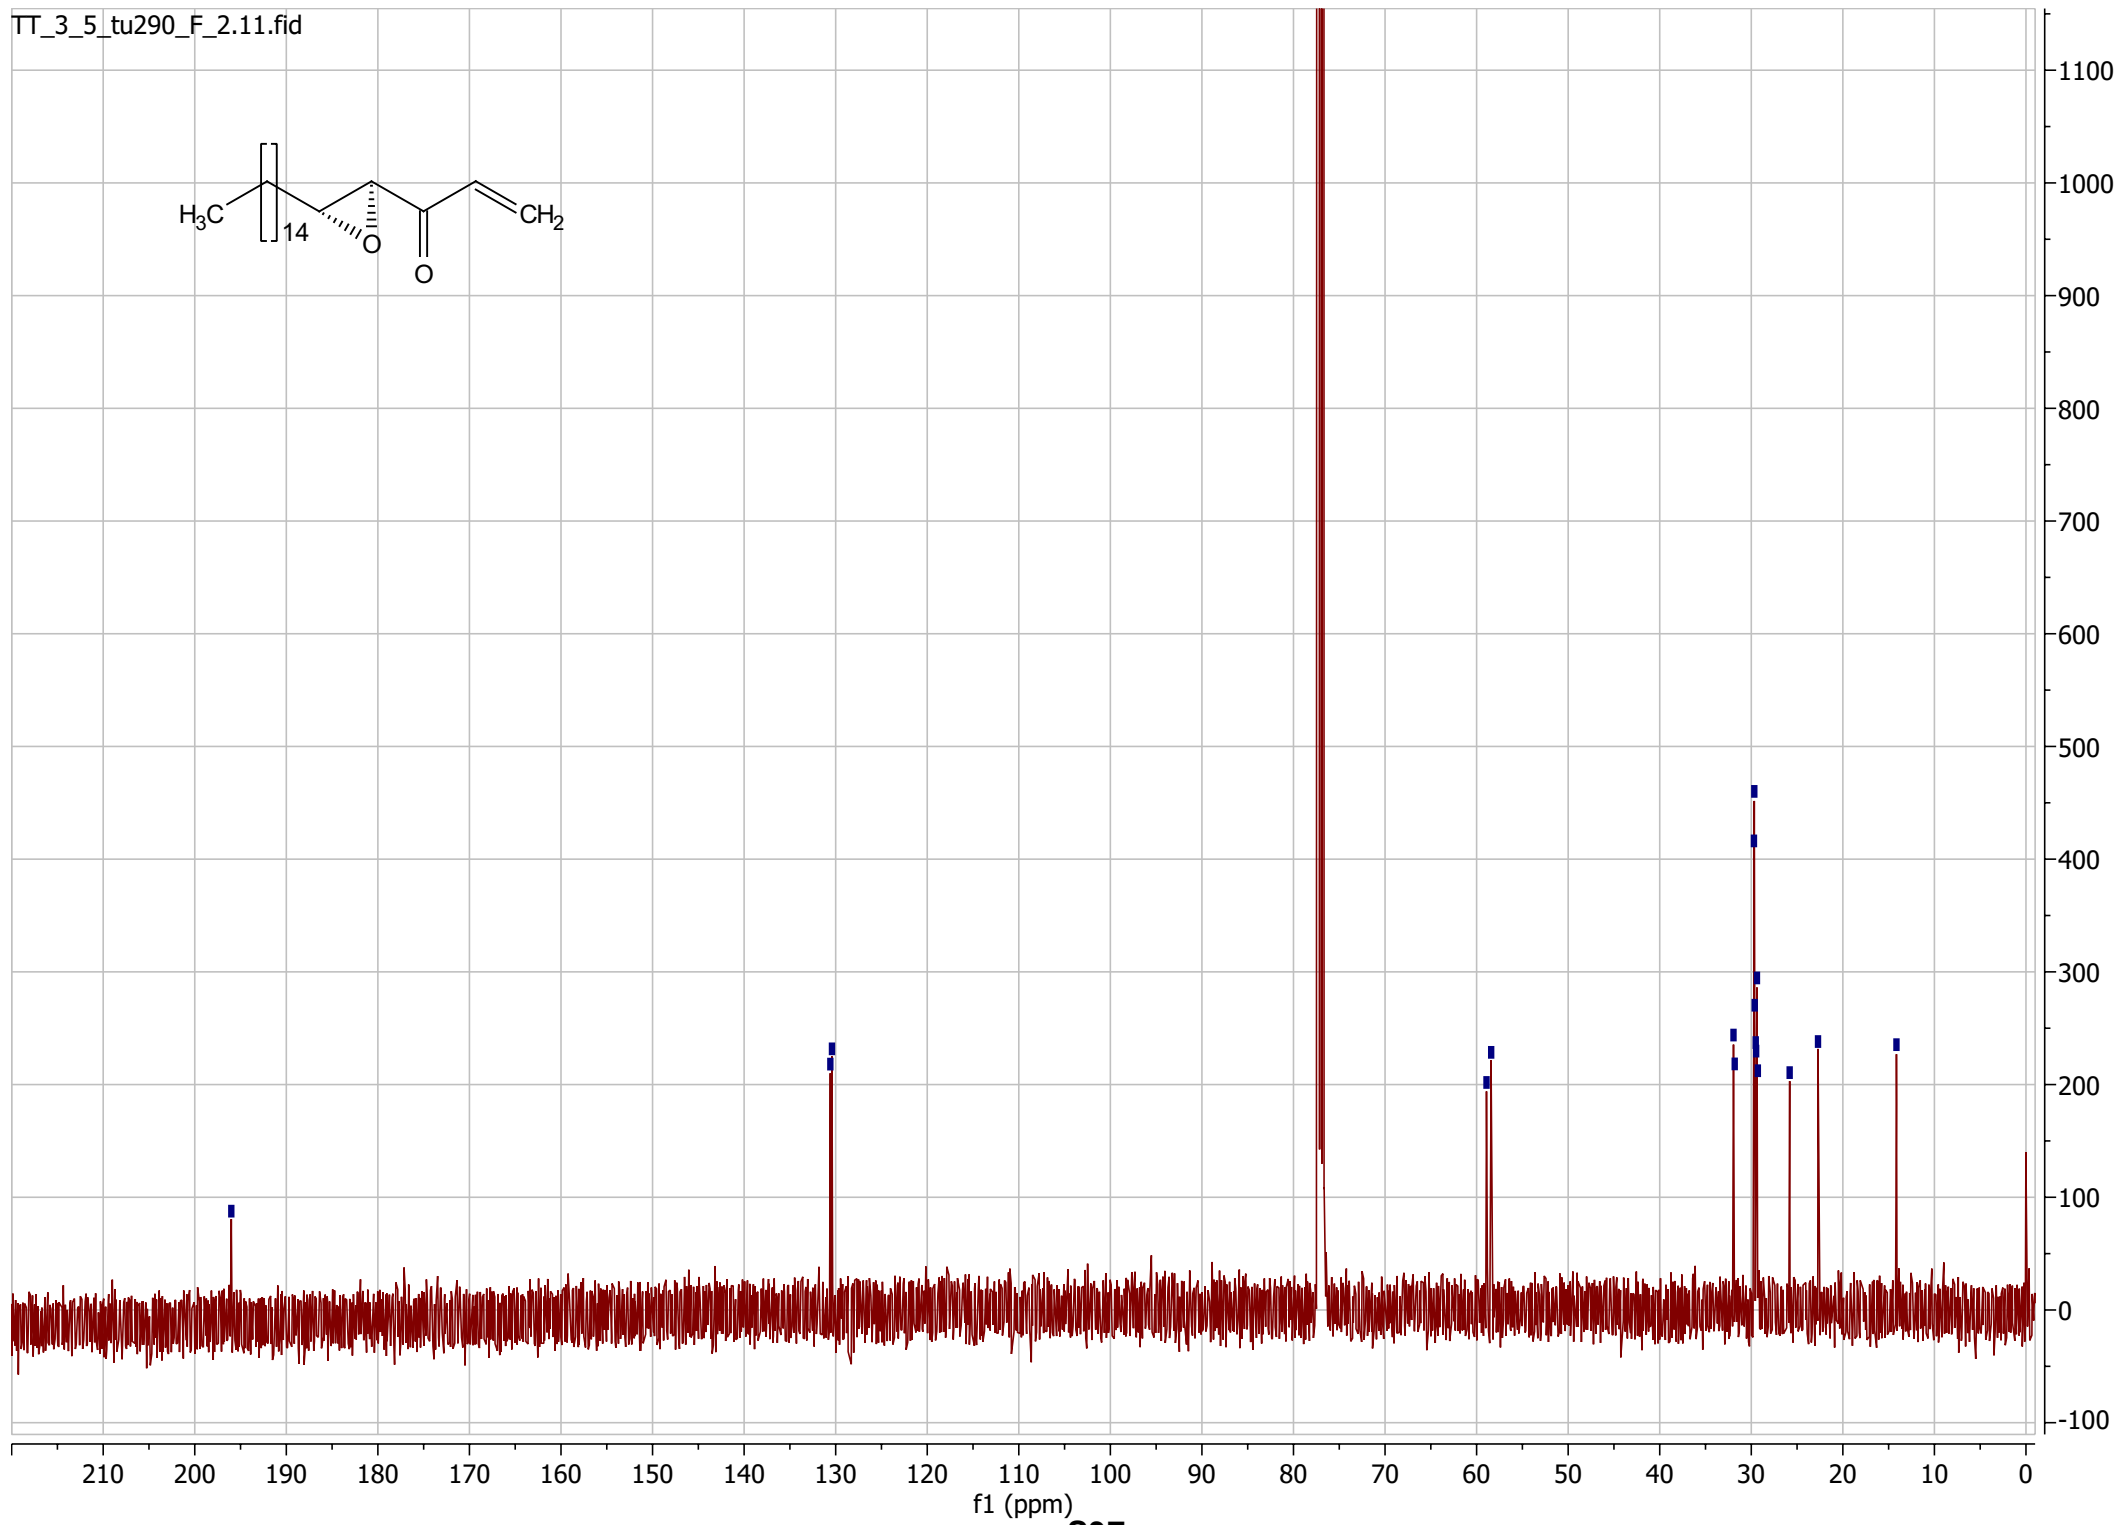

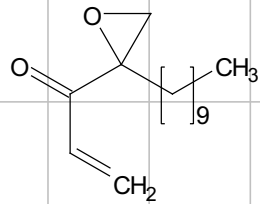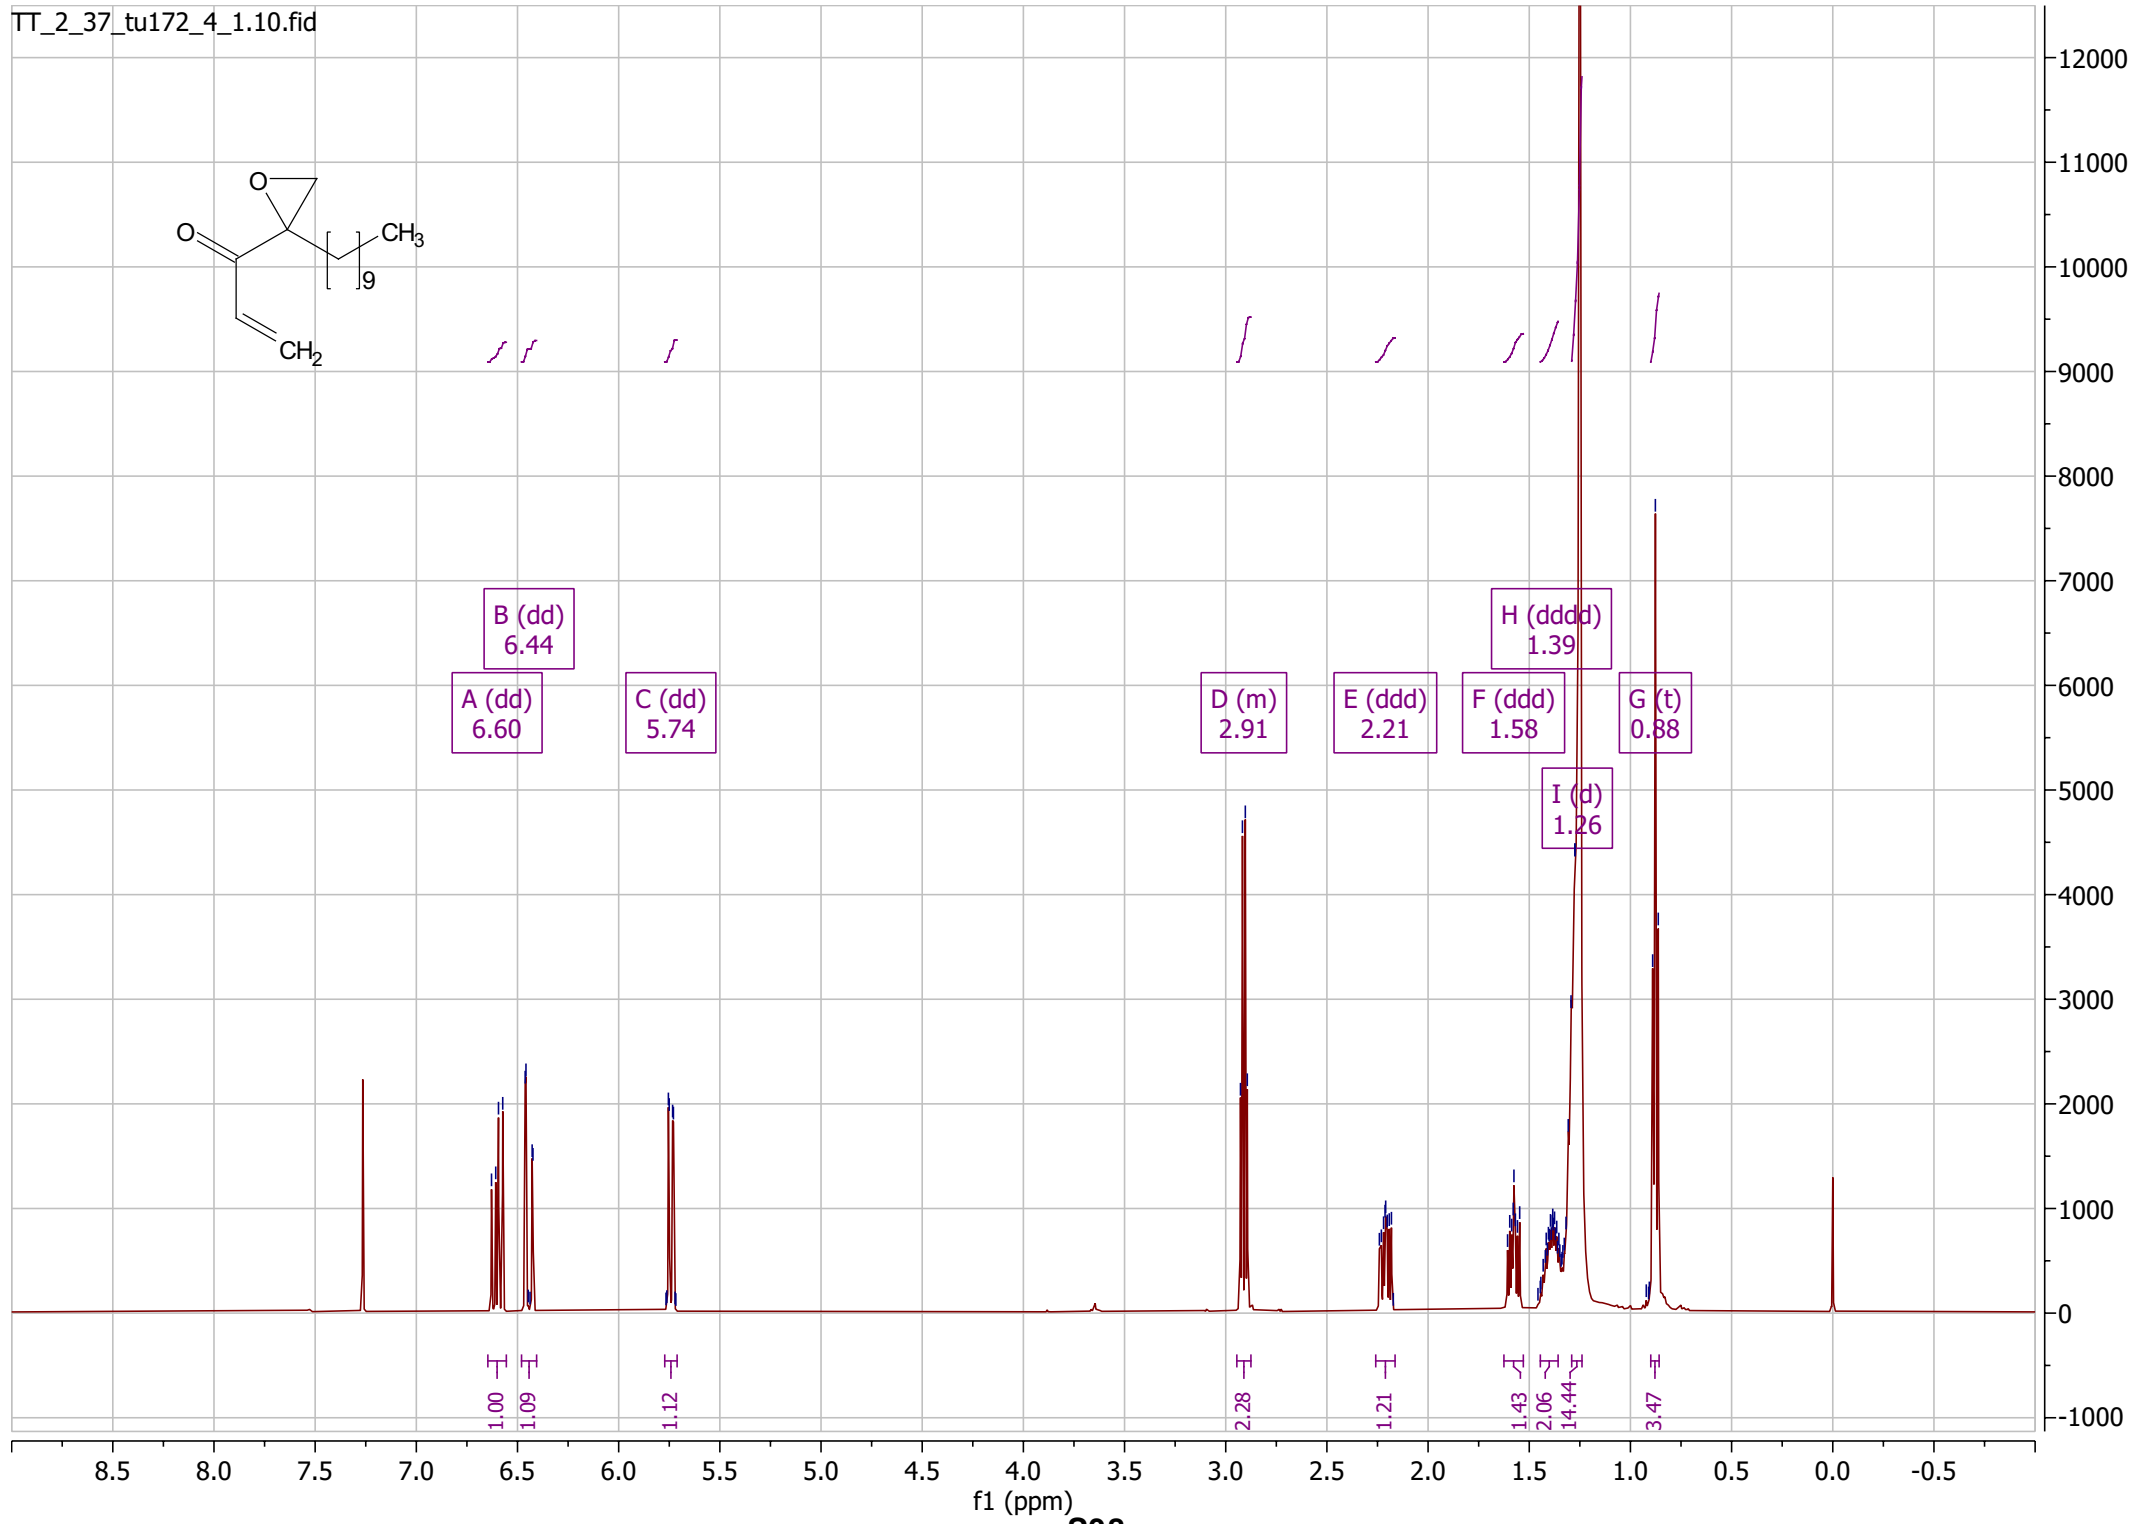

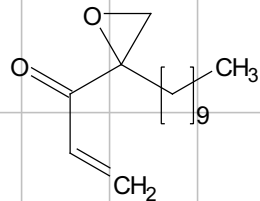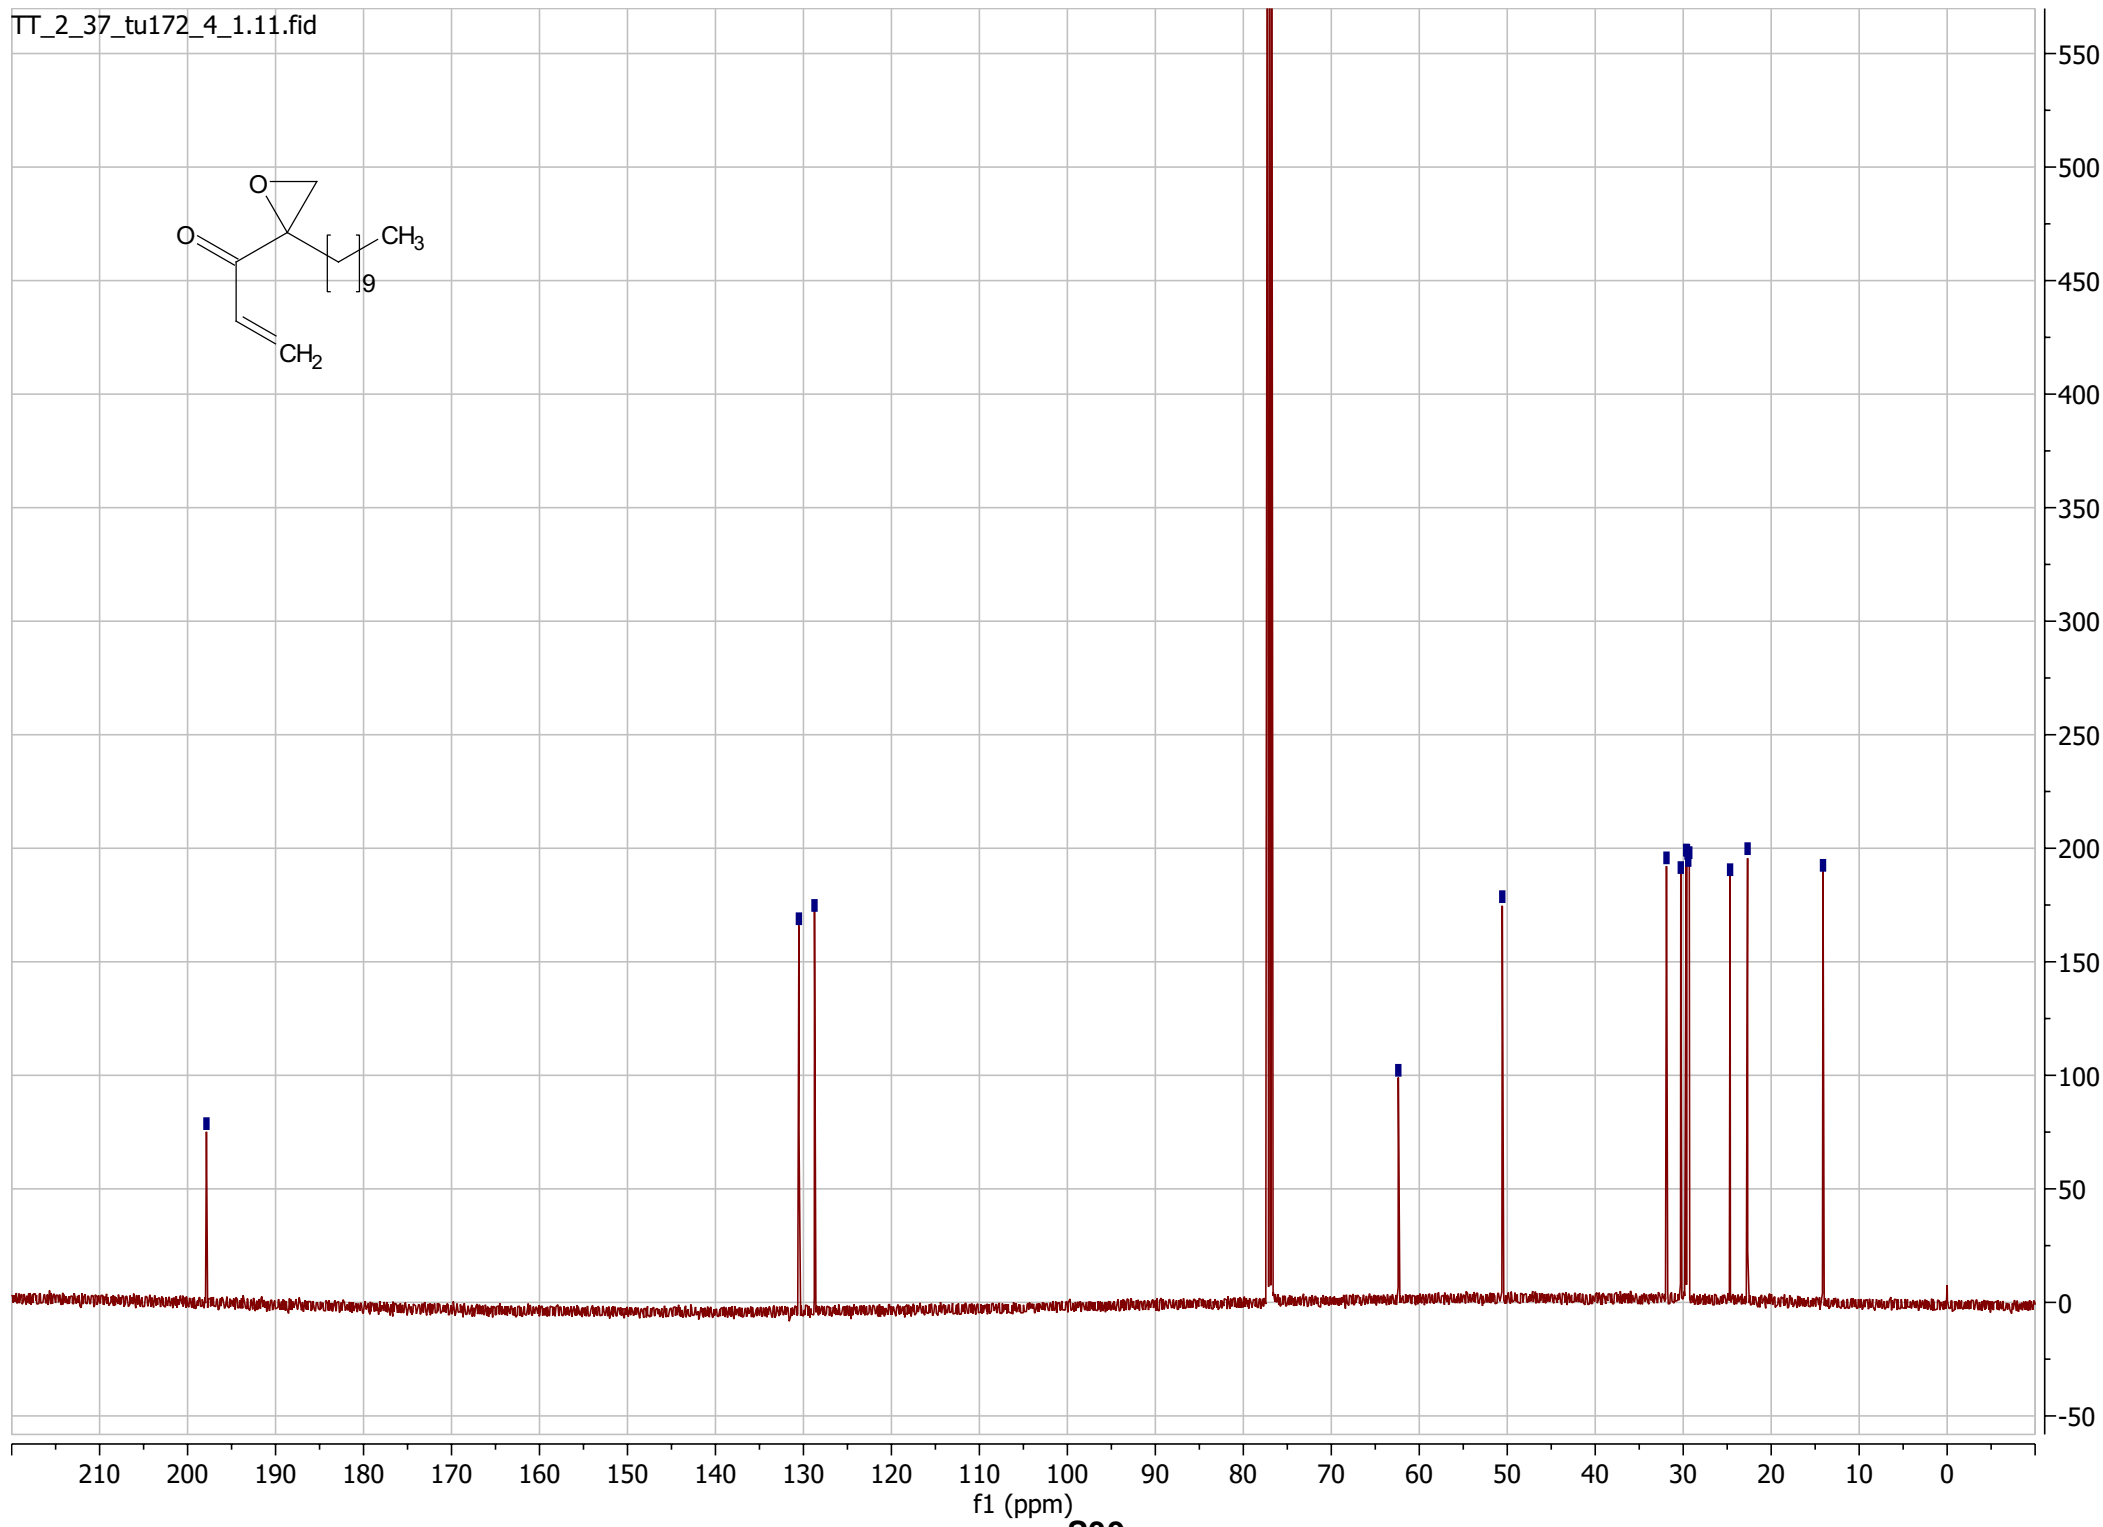

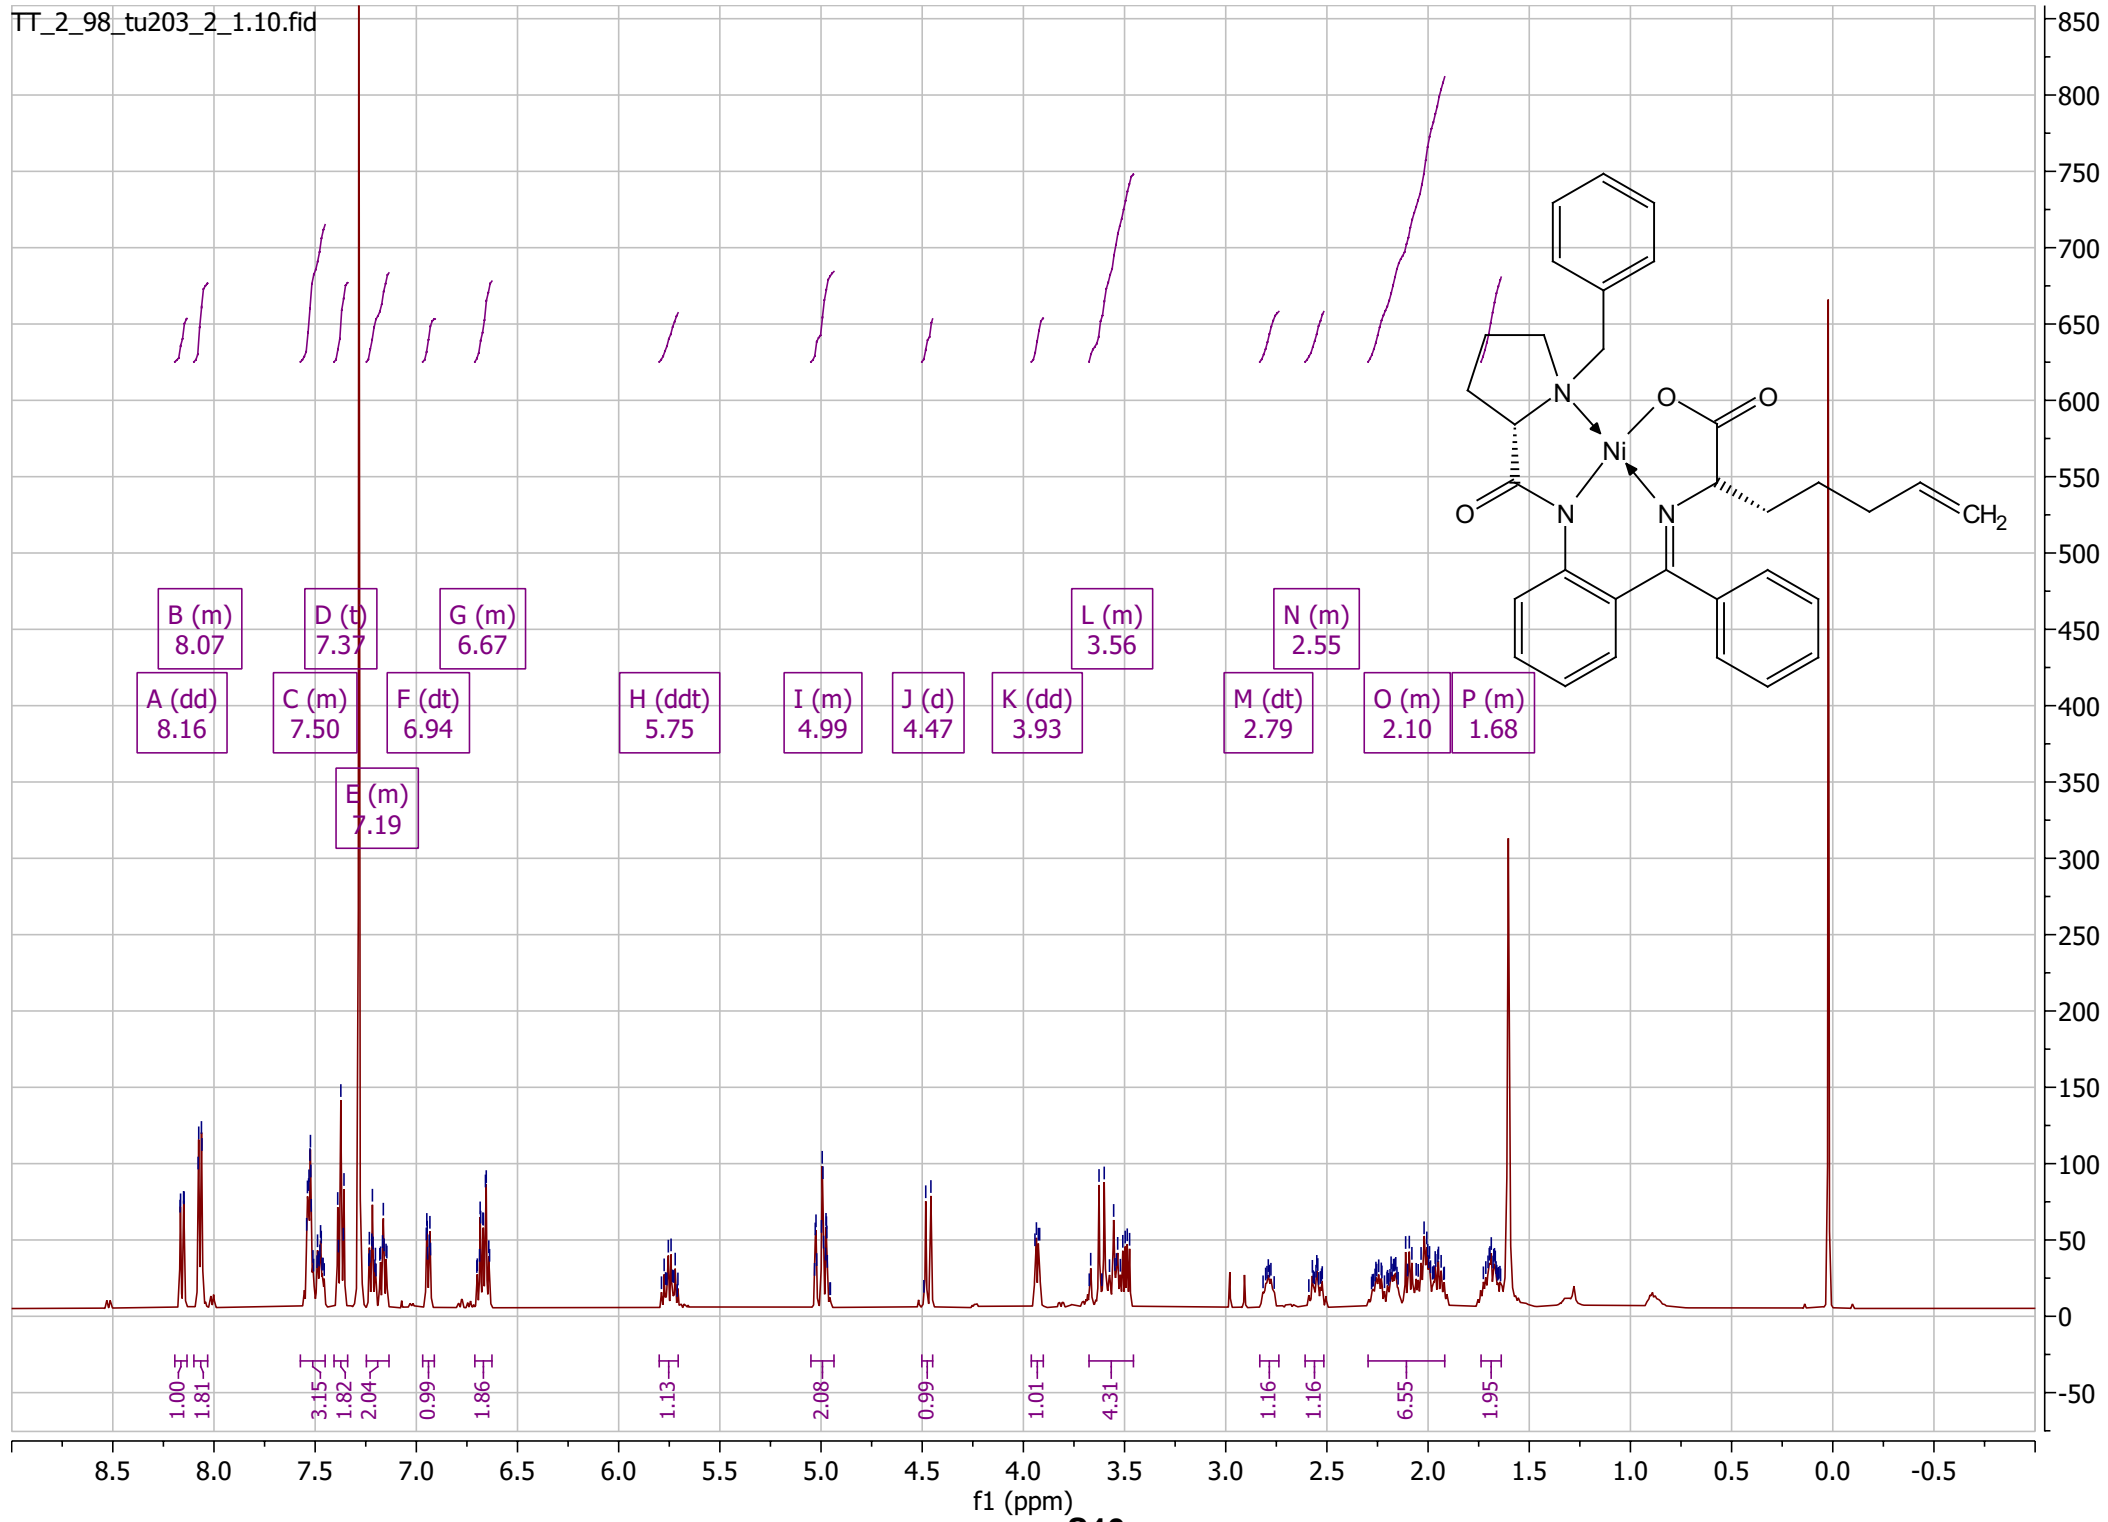



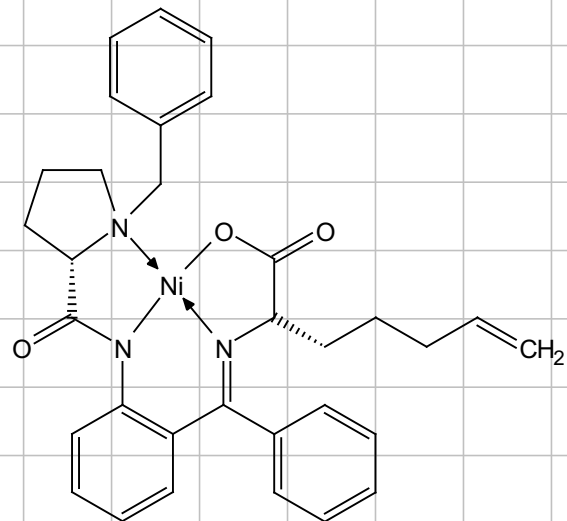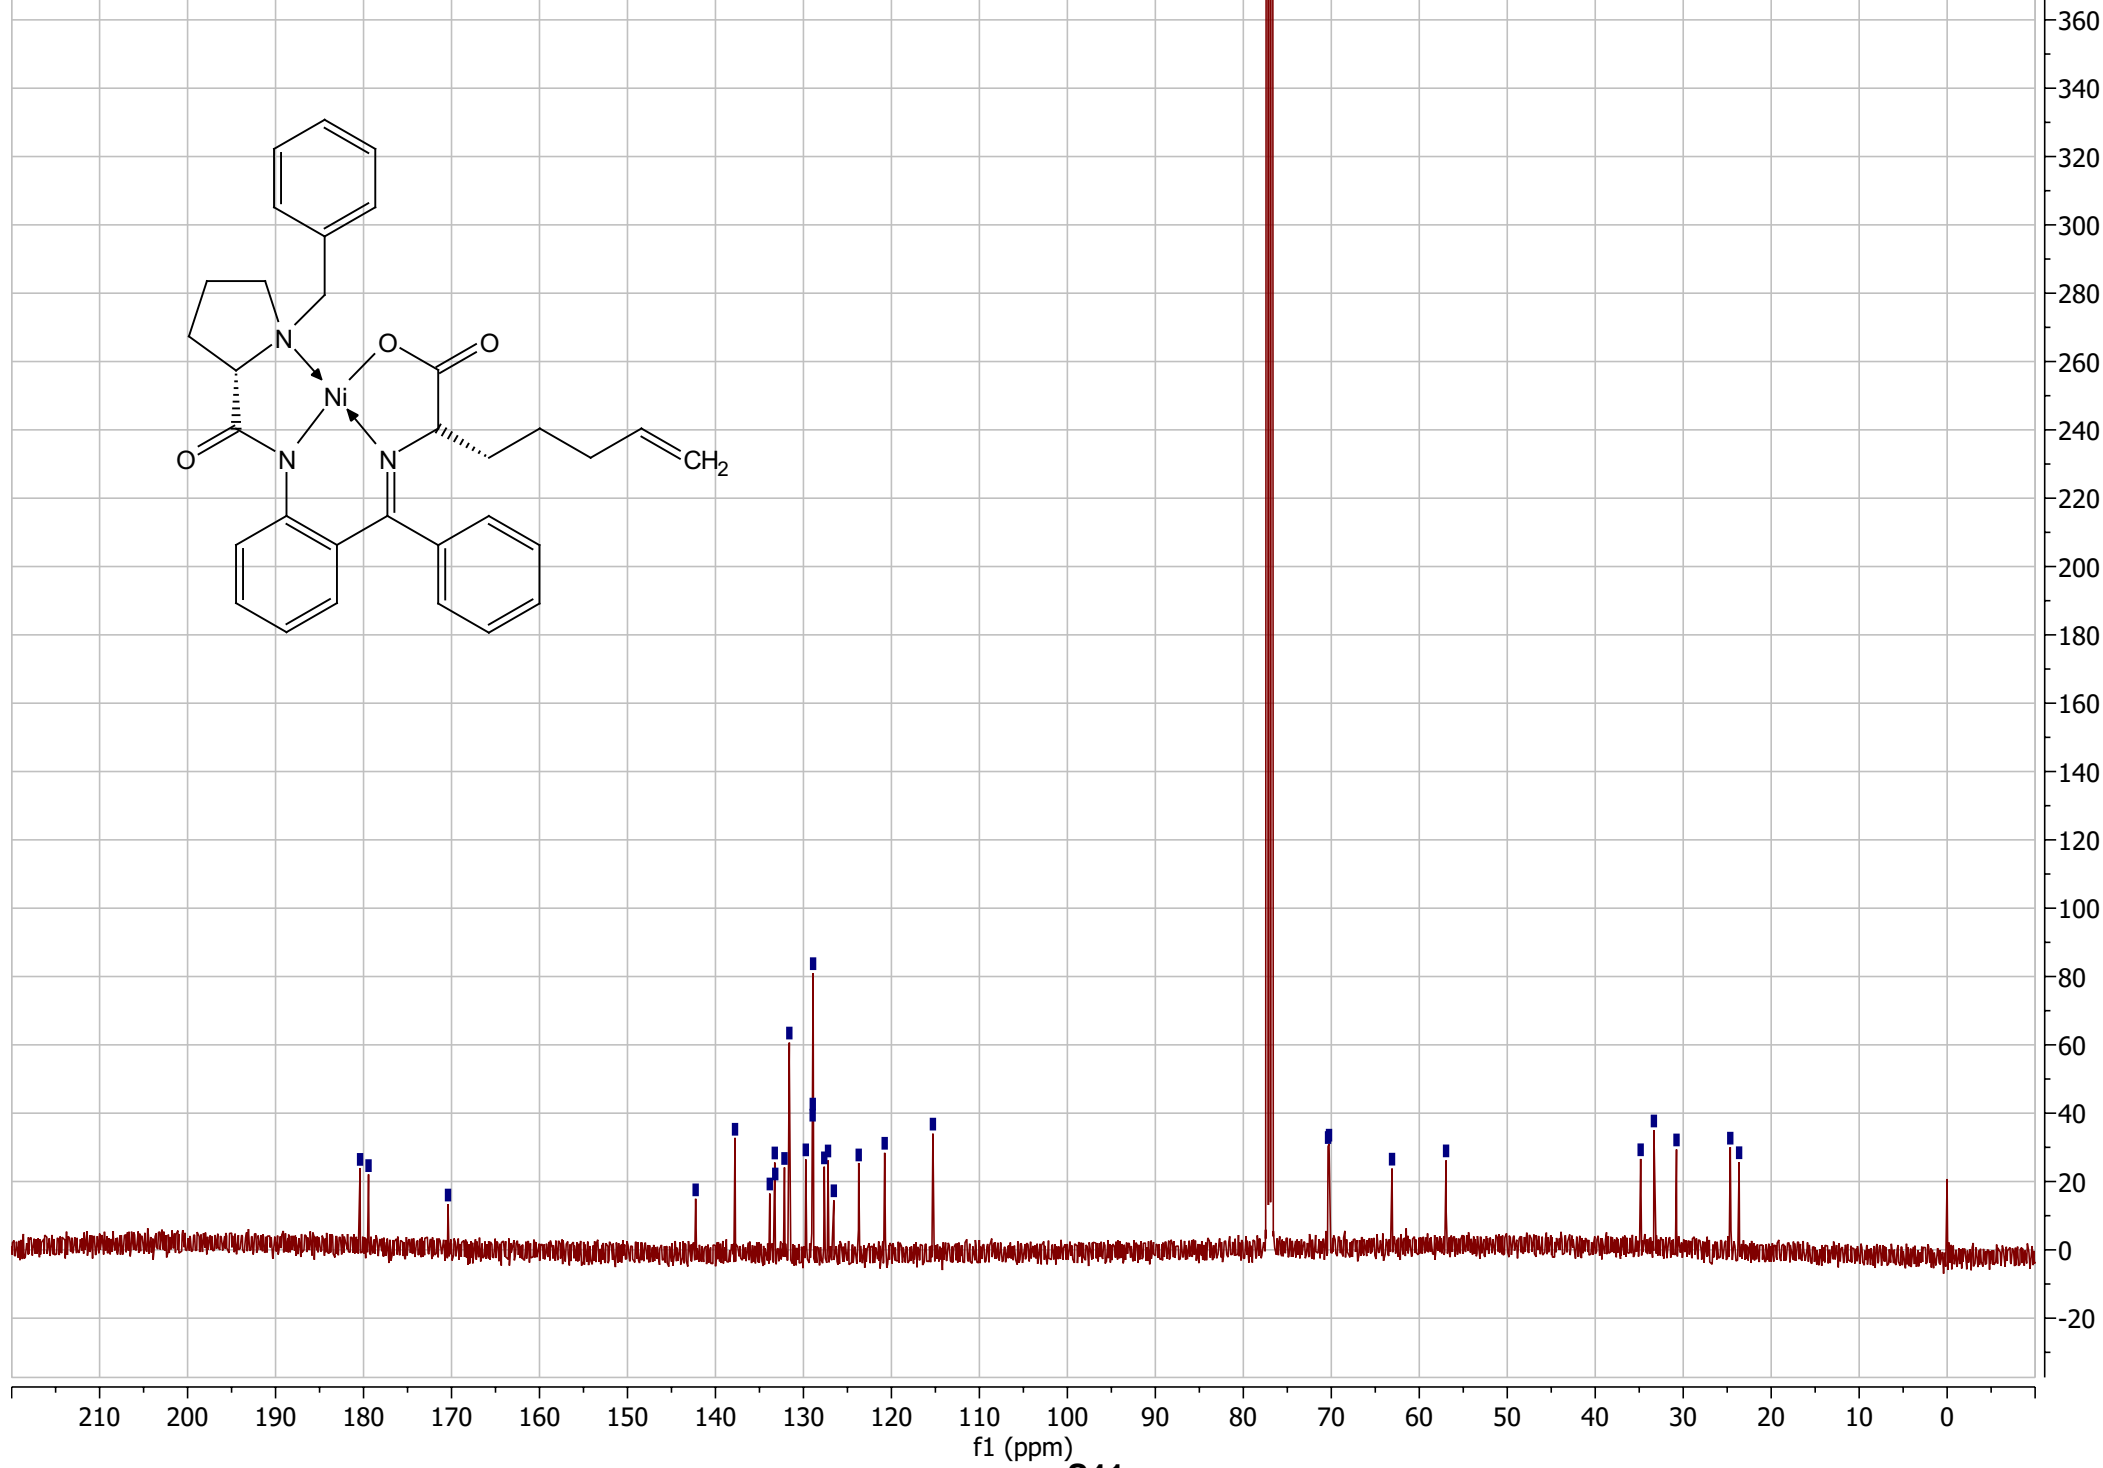

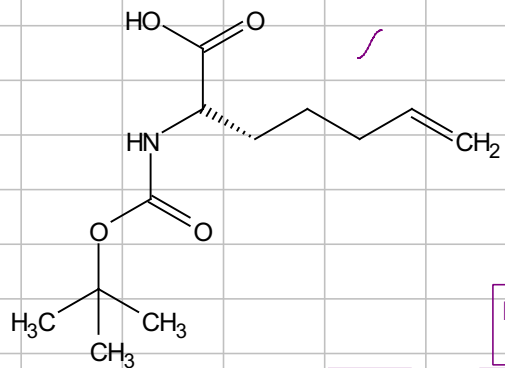

A (m)  
5.78

B (m)  
5.03

C (dd)  
4.23

H (d)  
4.98

D (p)  
2.08

E (s)  
1.88

F (dt)  
1.67

G (m)  
1.48

1.00

0.95

1.97

1.11

1.96

0.93

0.97

10.22

f1 (ppm)

S42

2300  
2200  
2100  
2000  
1900  
1800  
1700  
1600  
1500  
1400  
1300  
1200  
1100  
1000  
900  
800  
700  
600  
500  
400  
300  
200  
100  
0  
-100  
-200

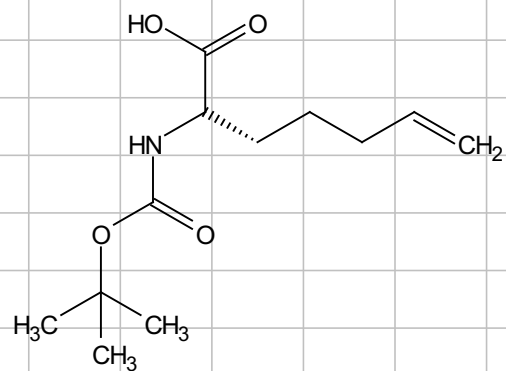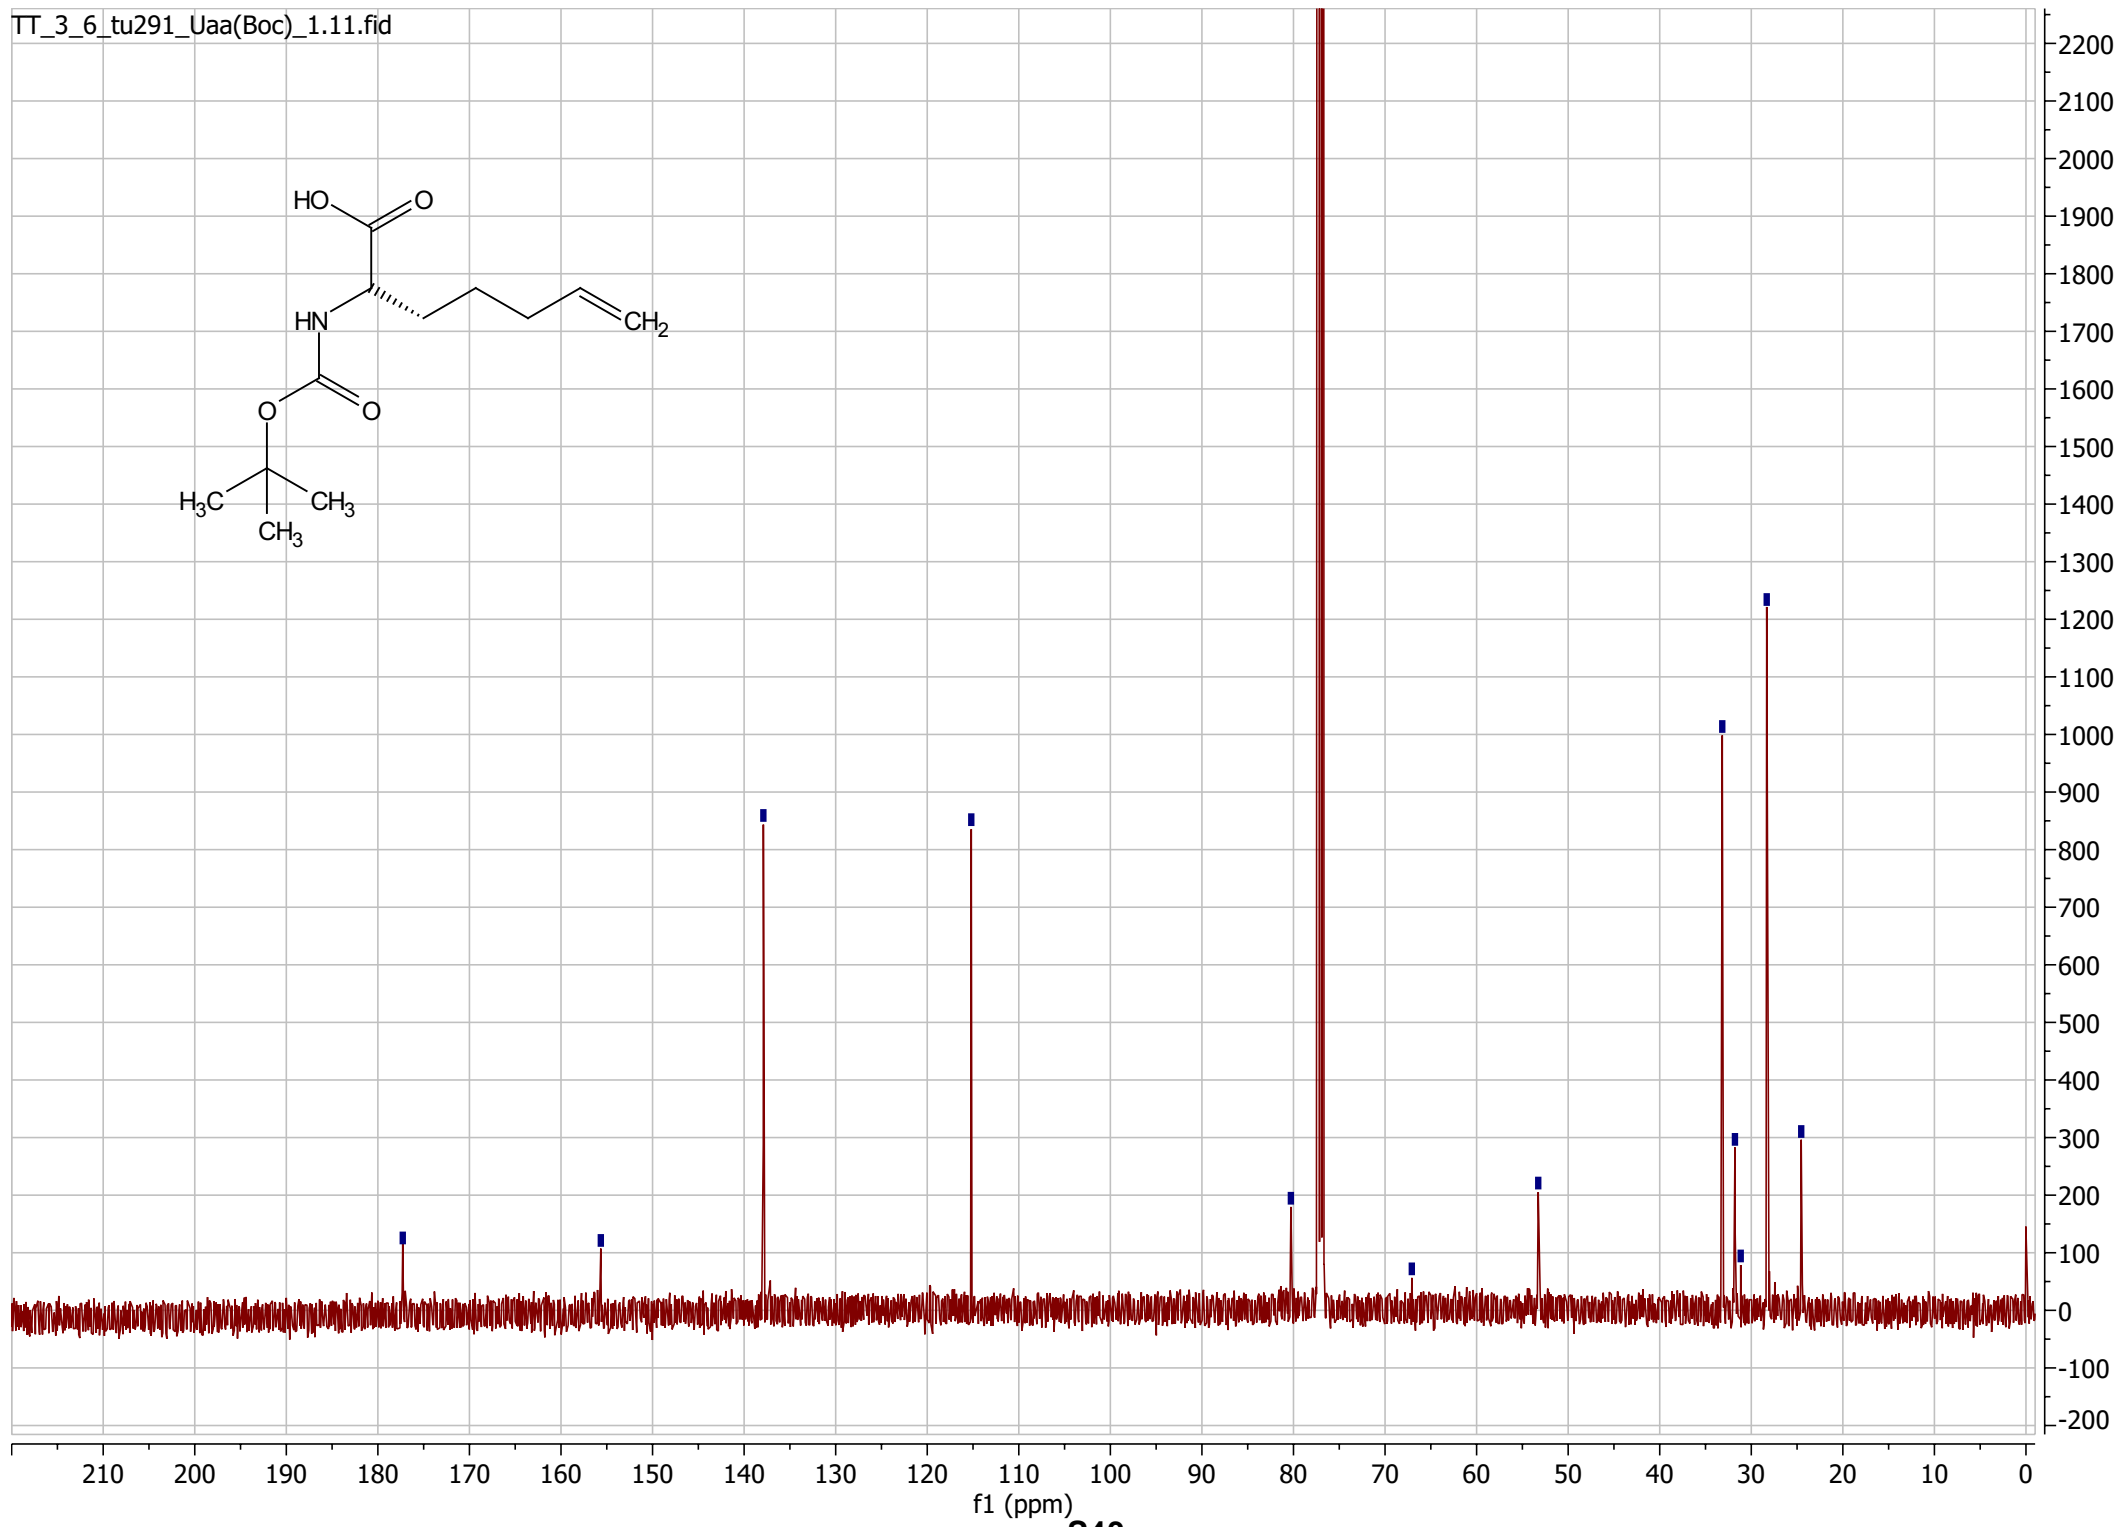

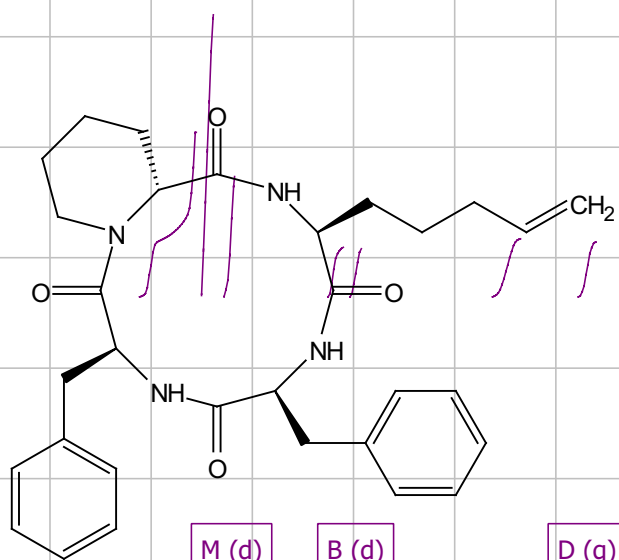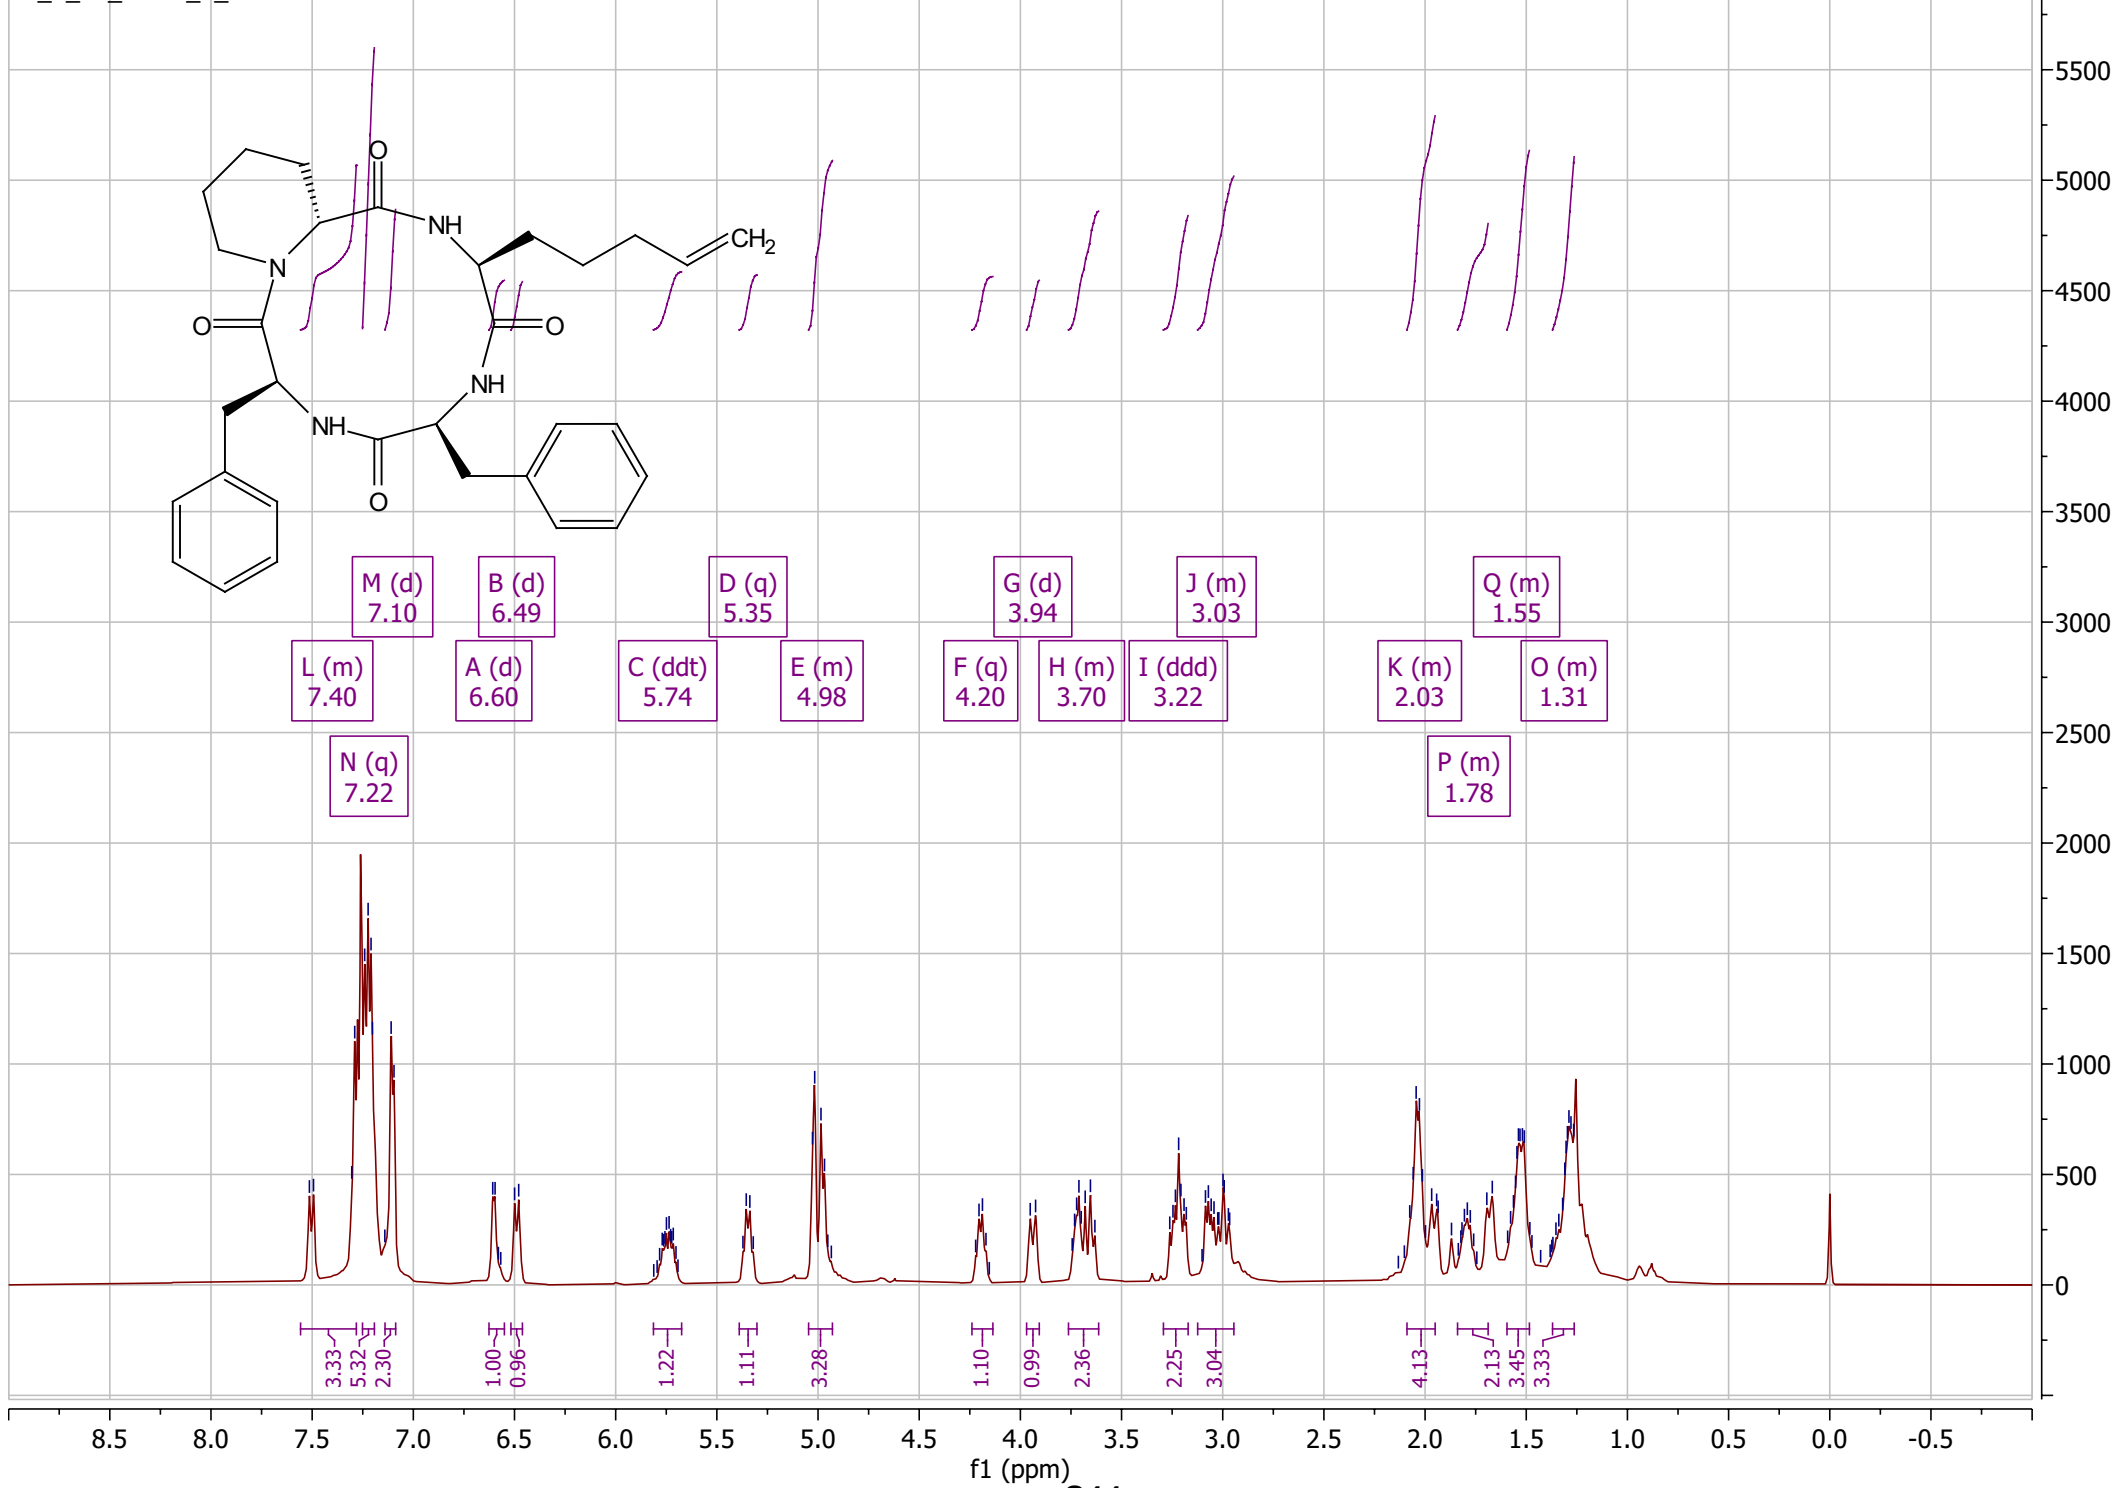

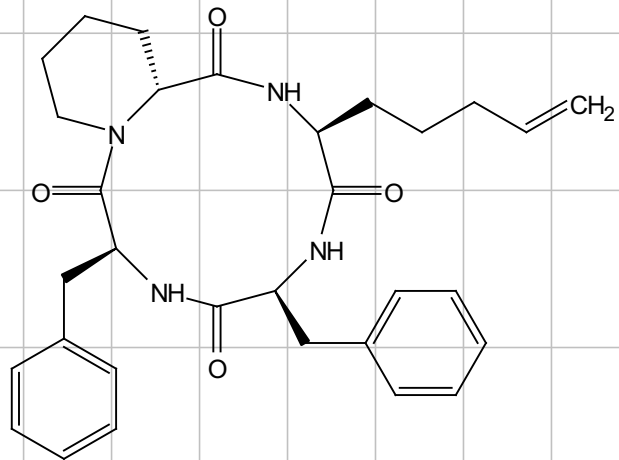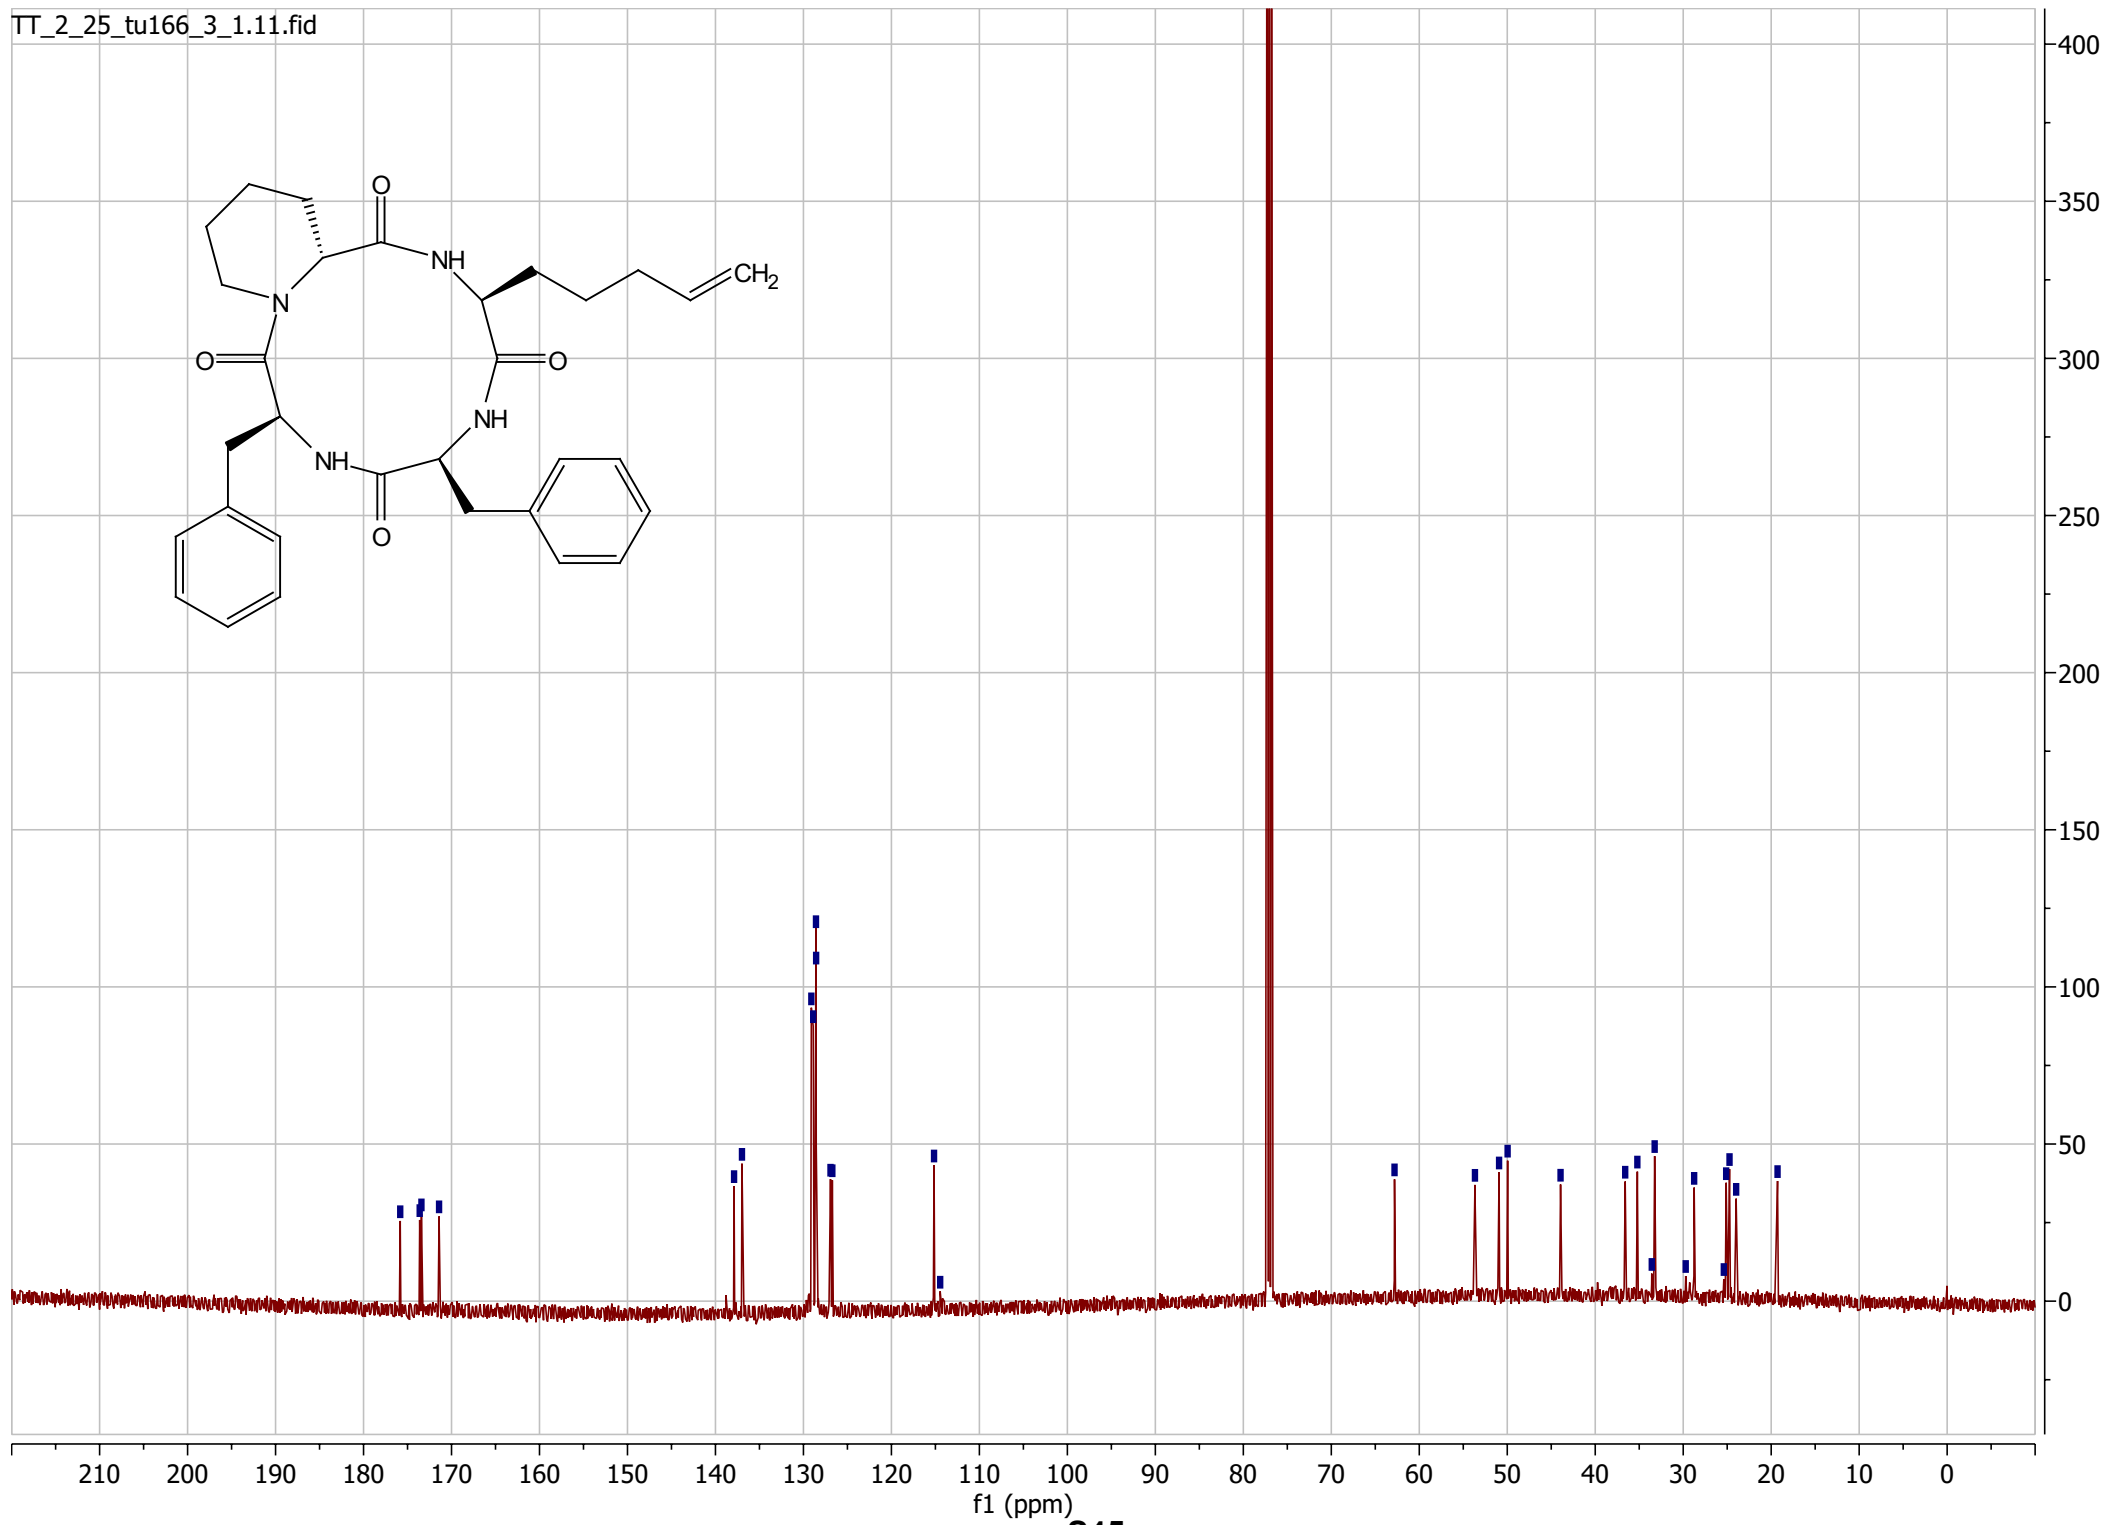

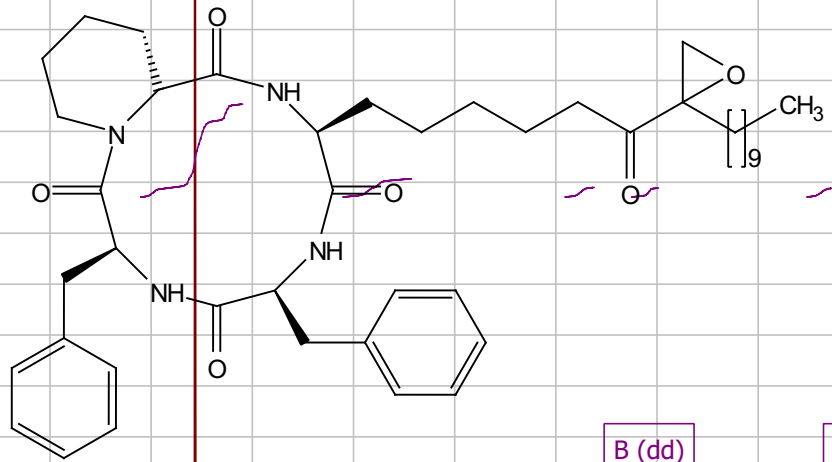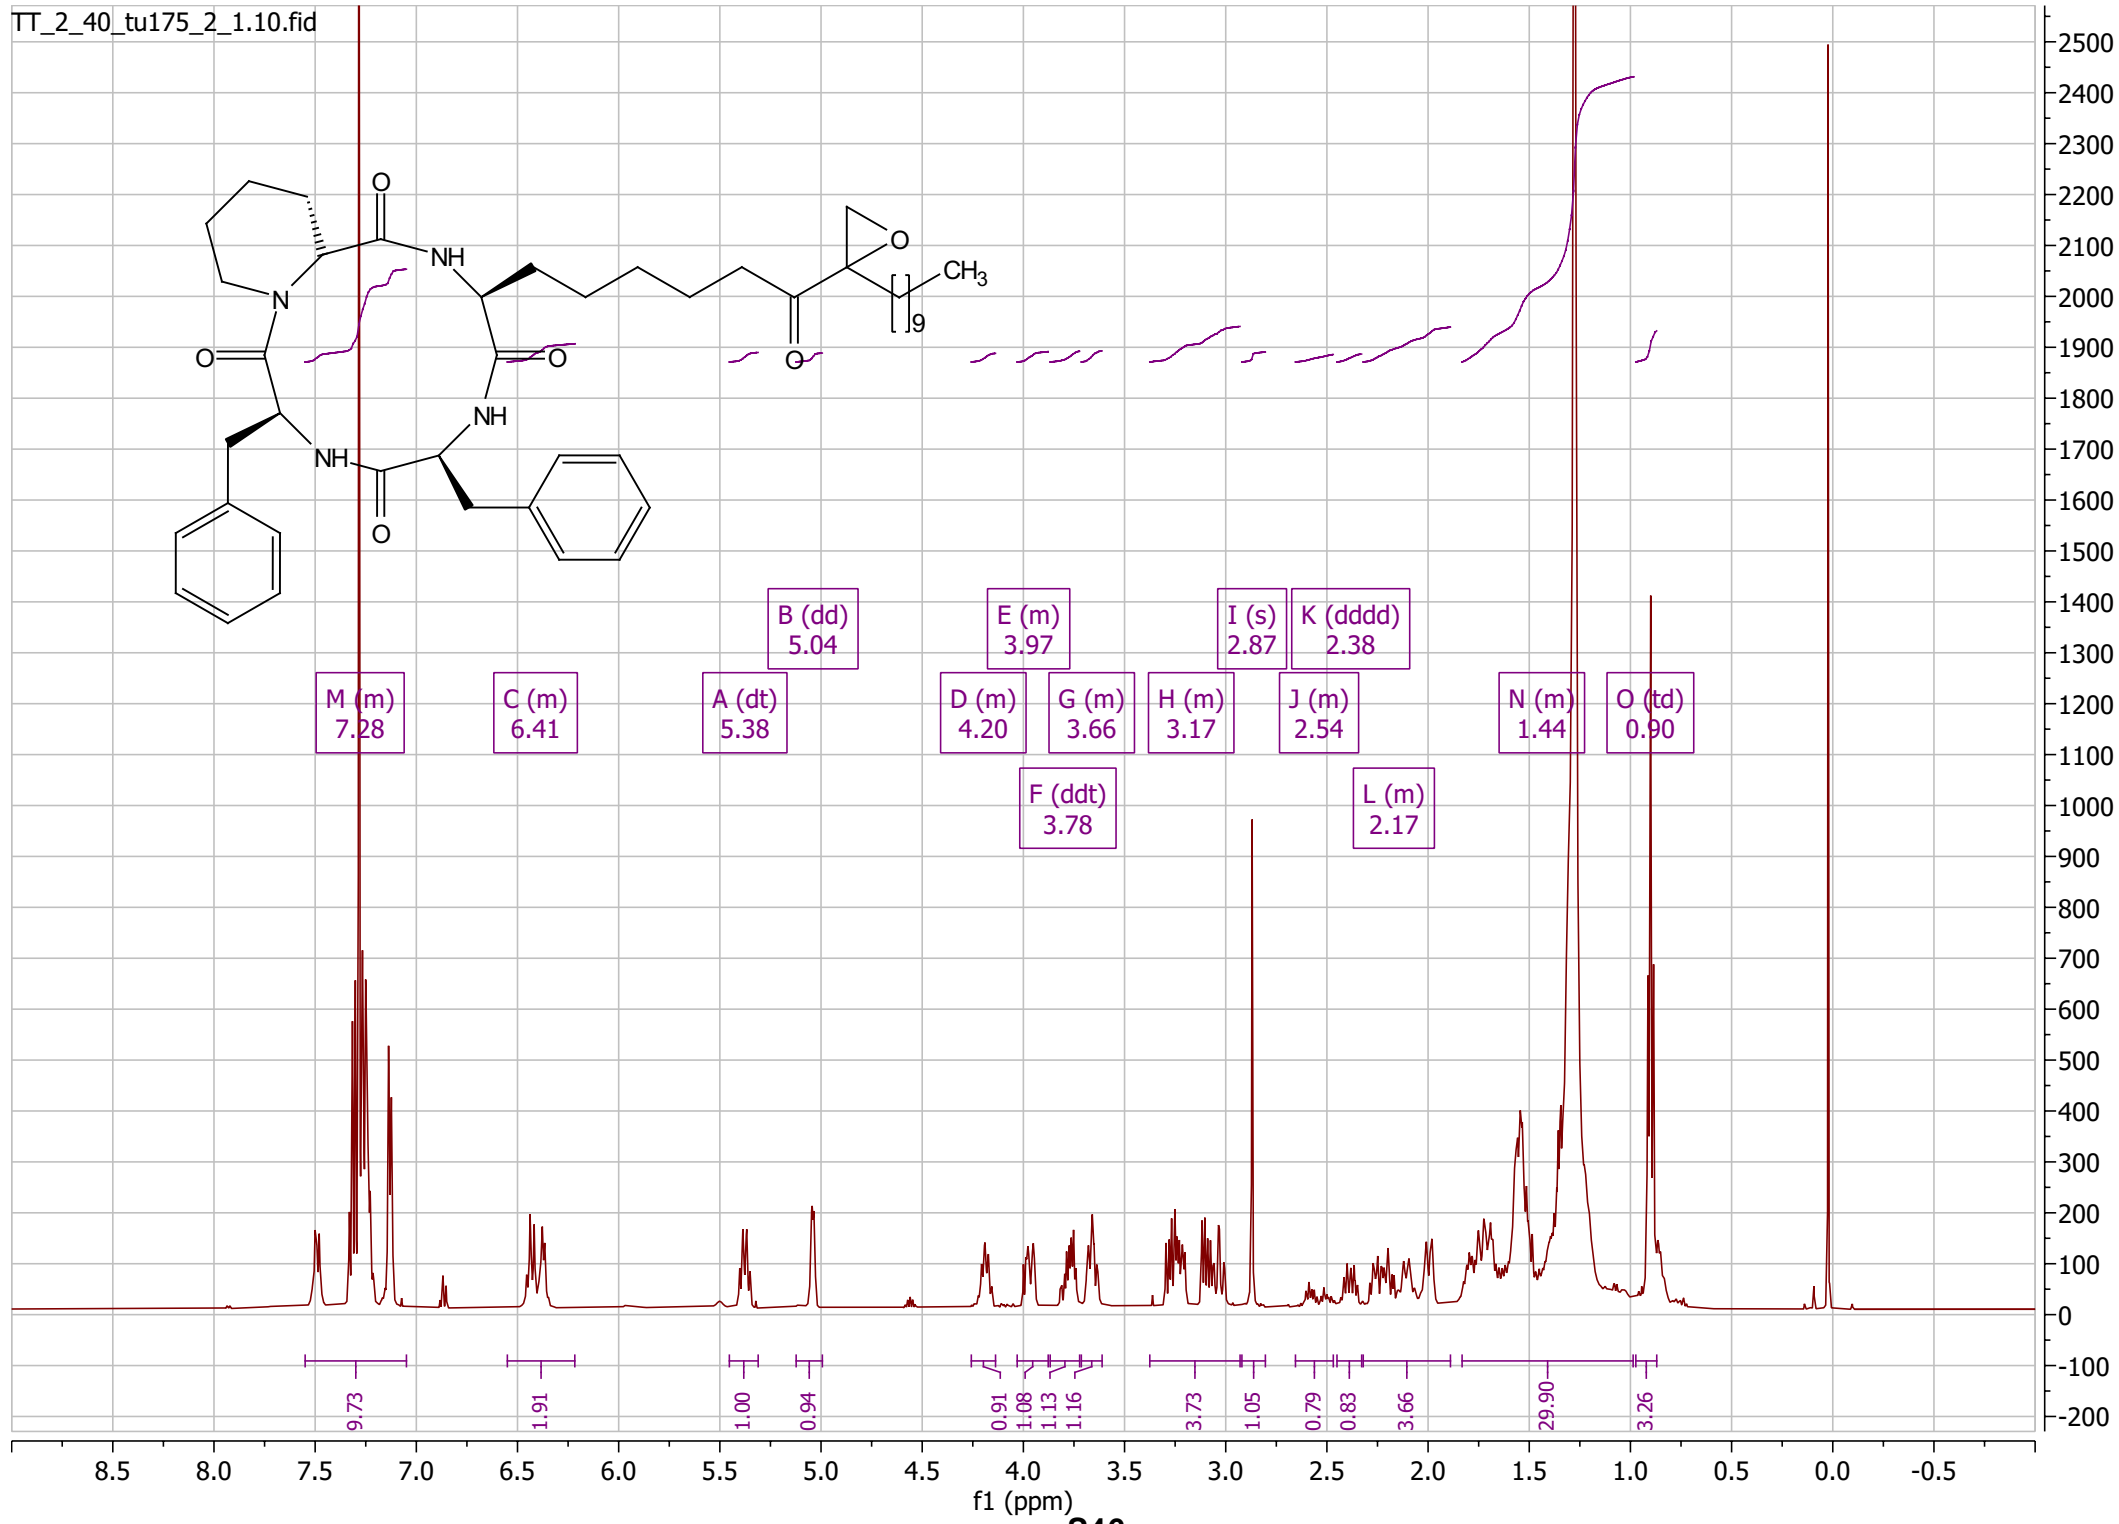

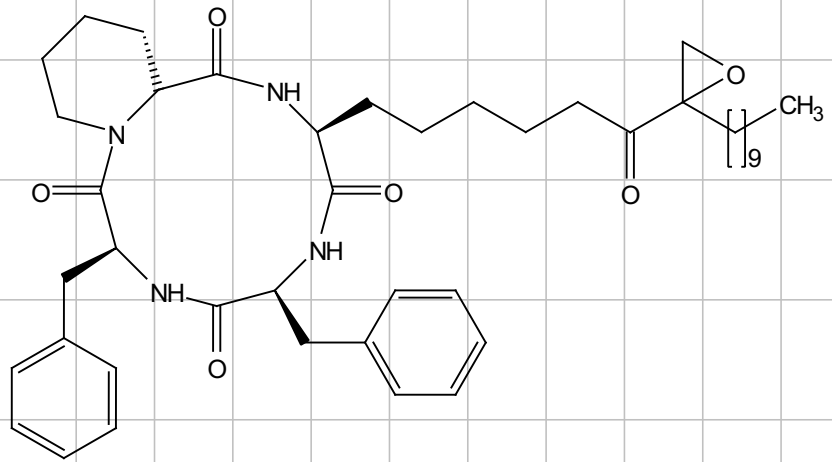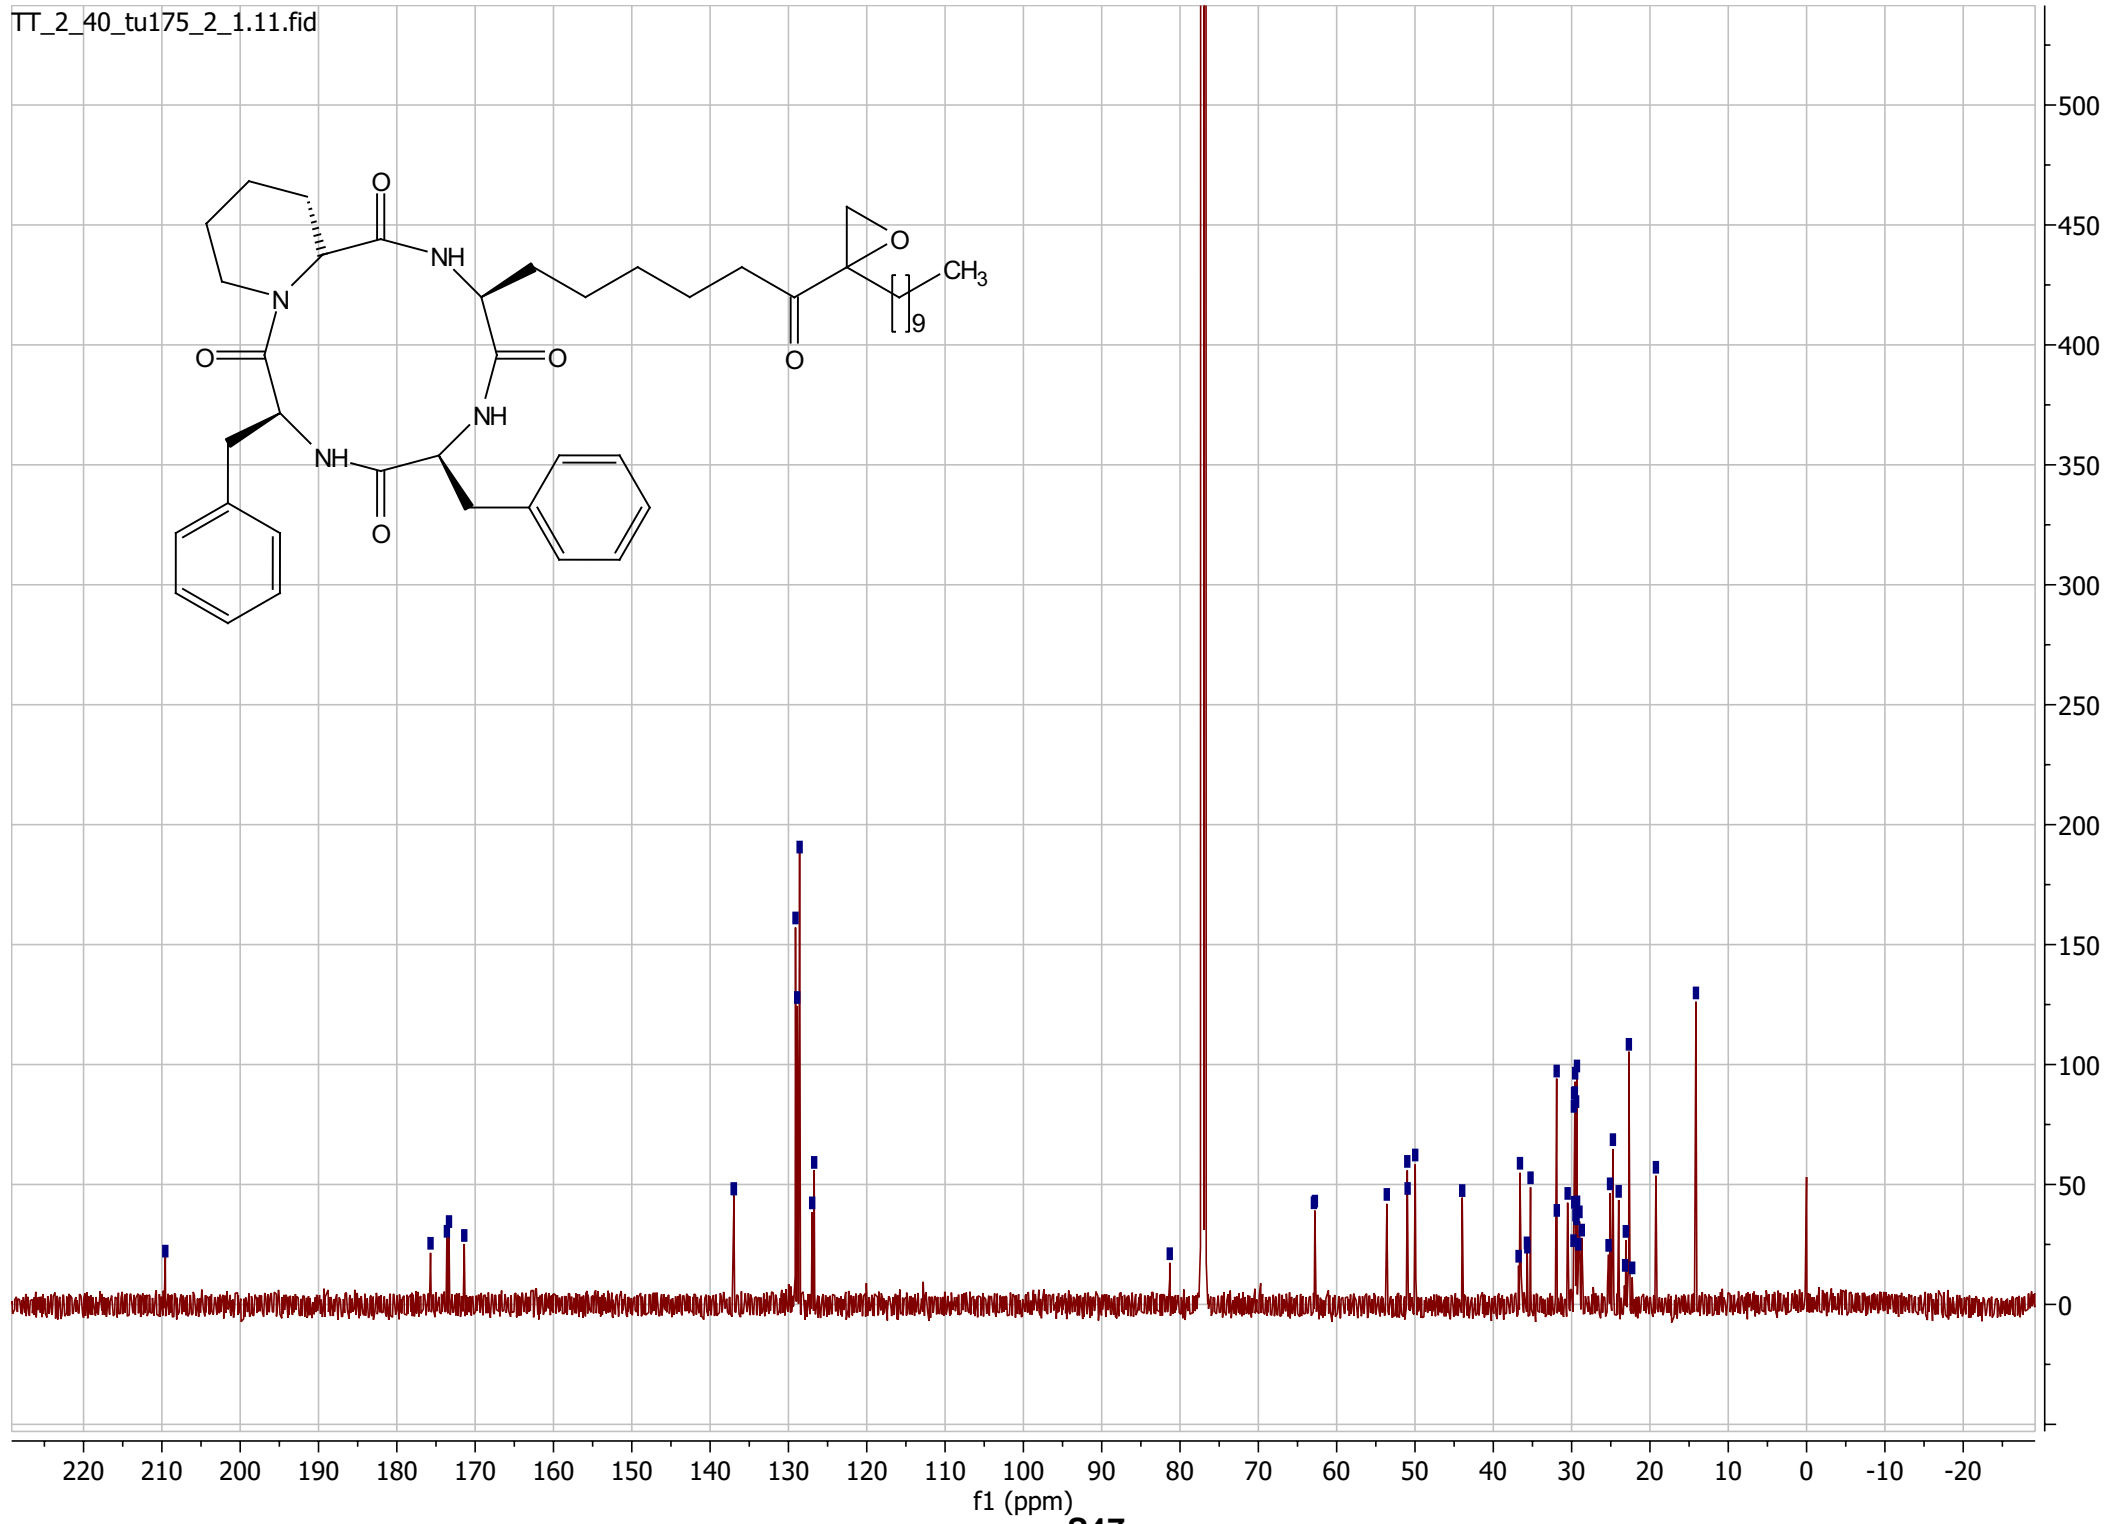

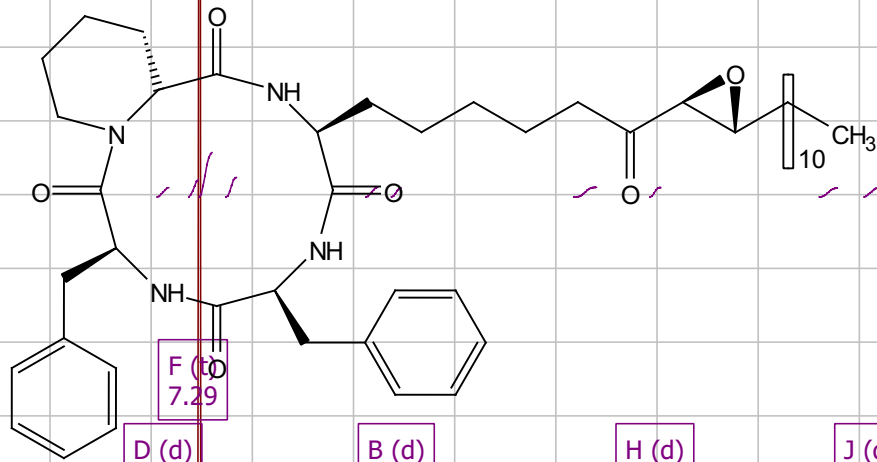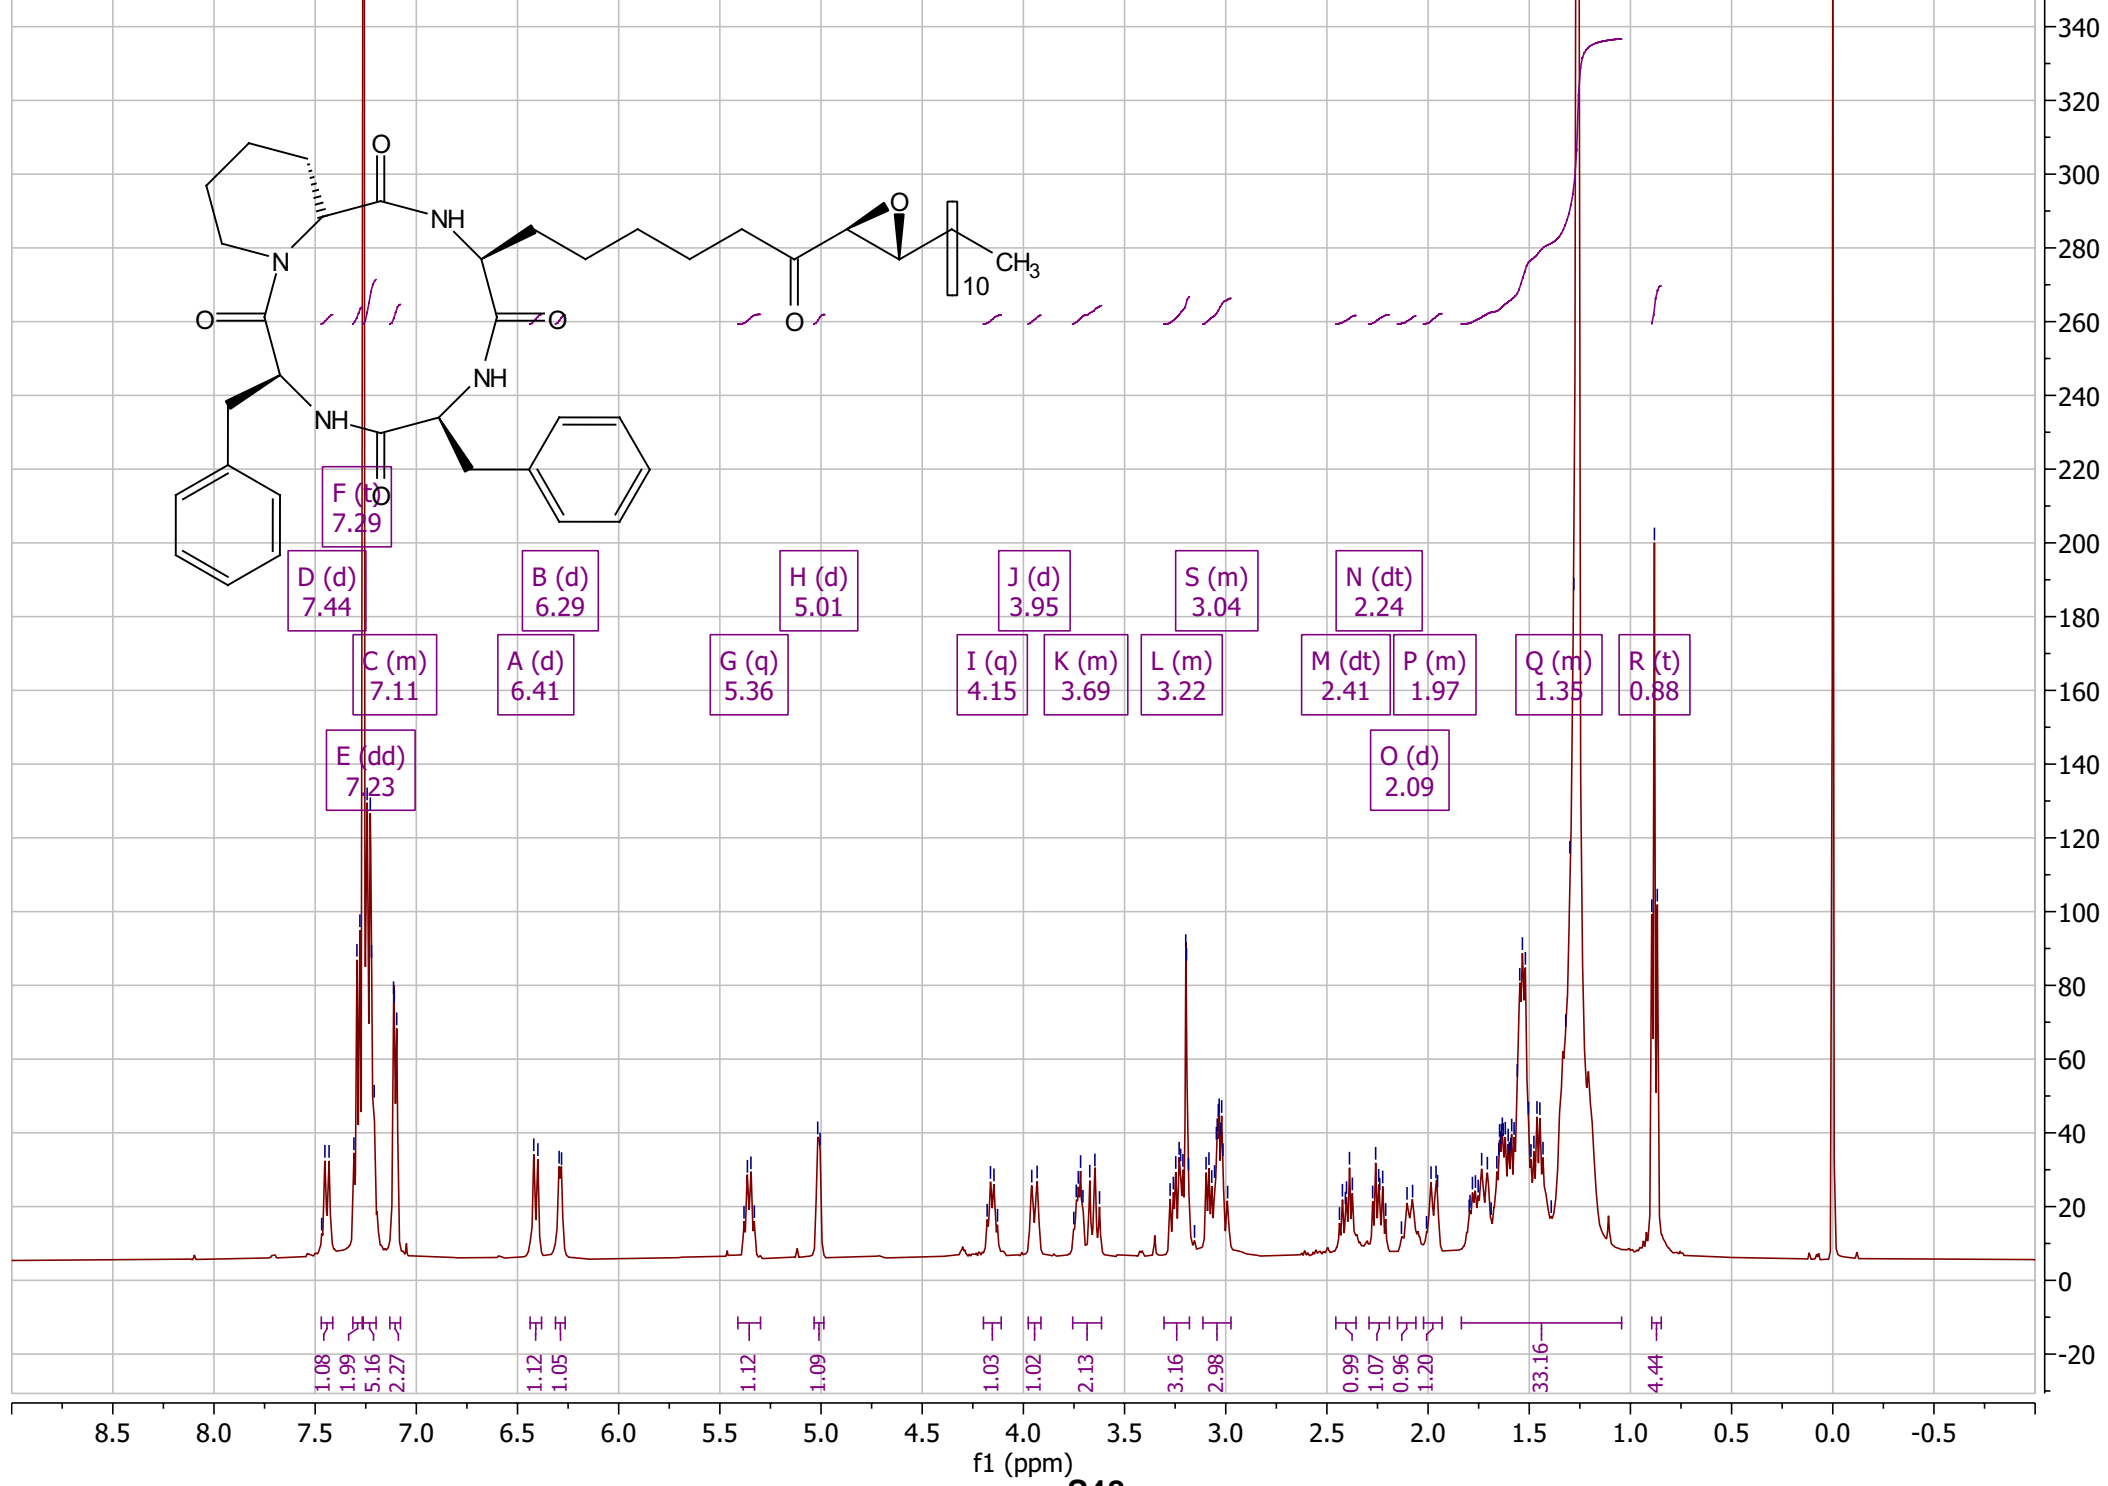





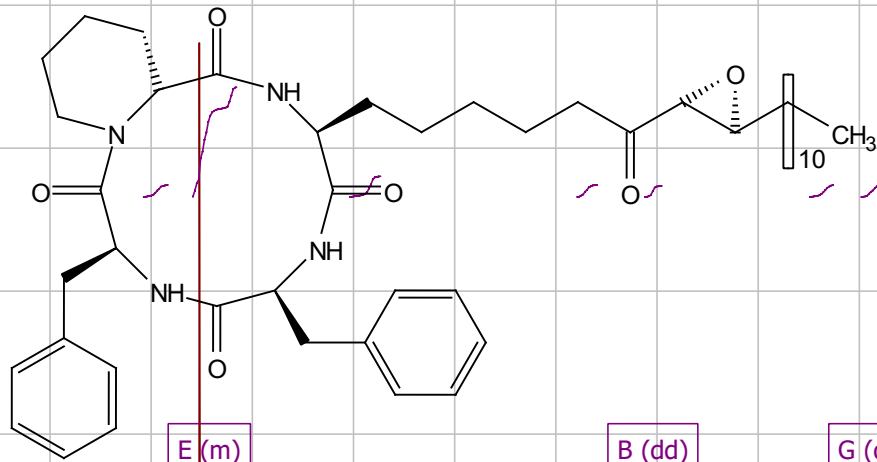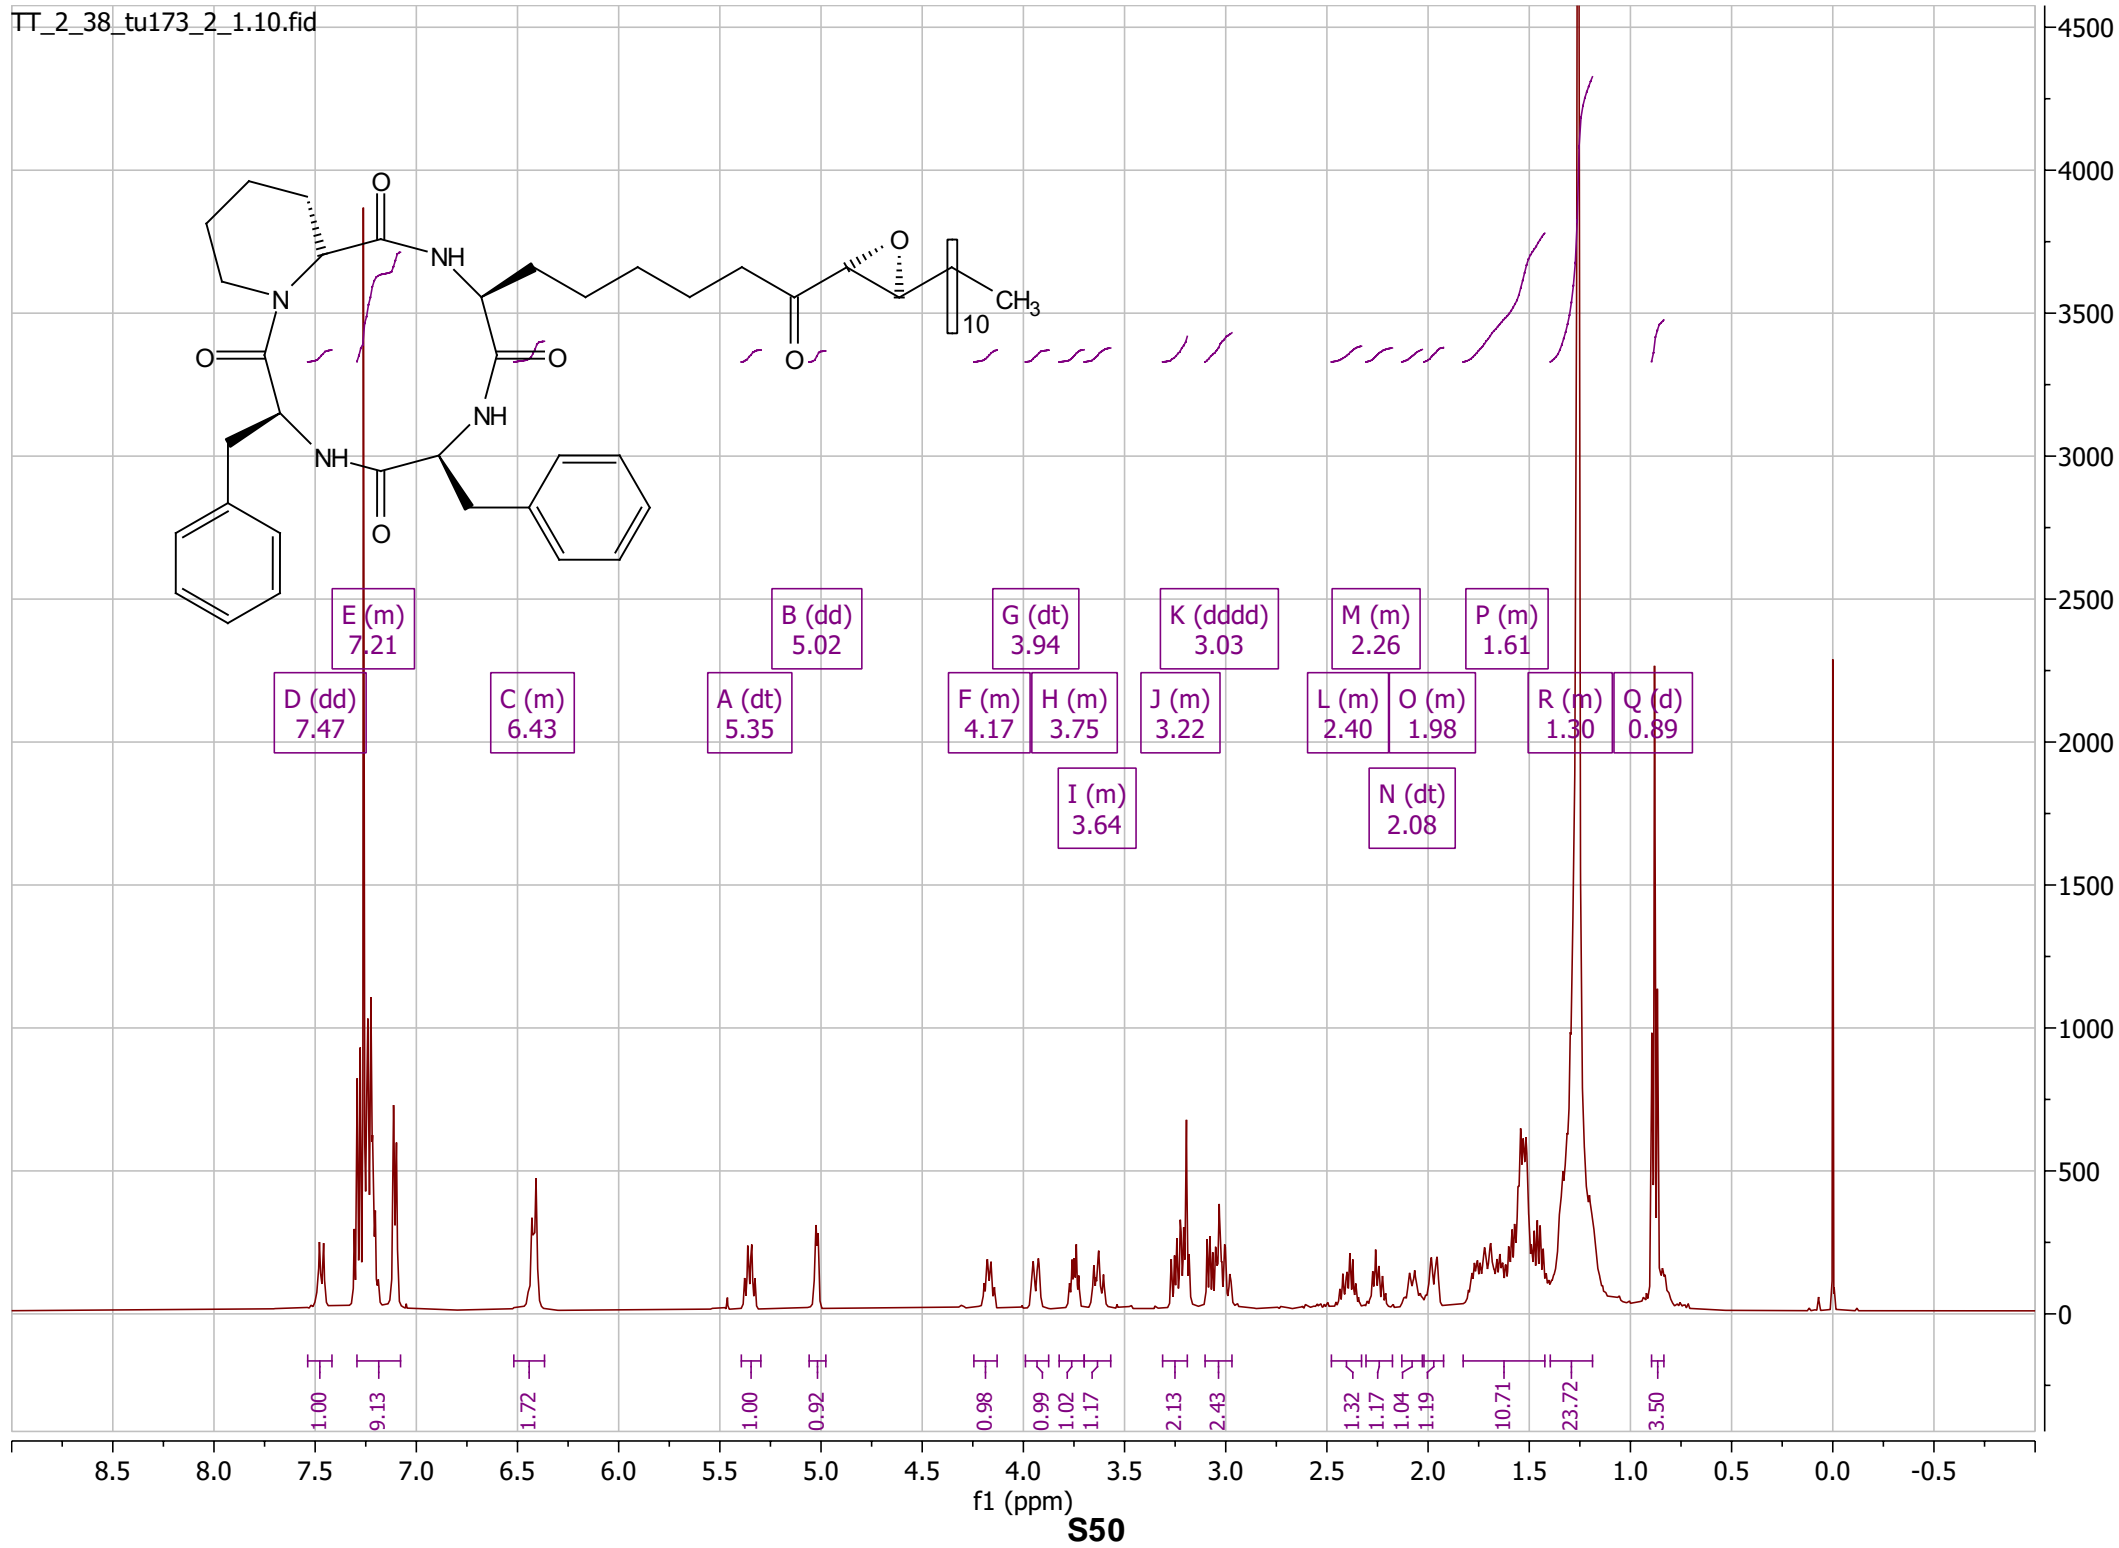

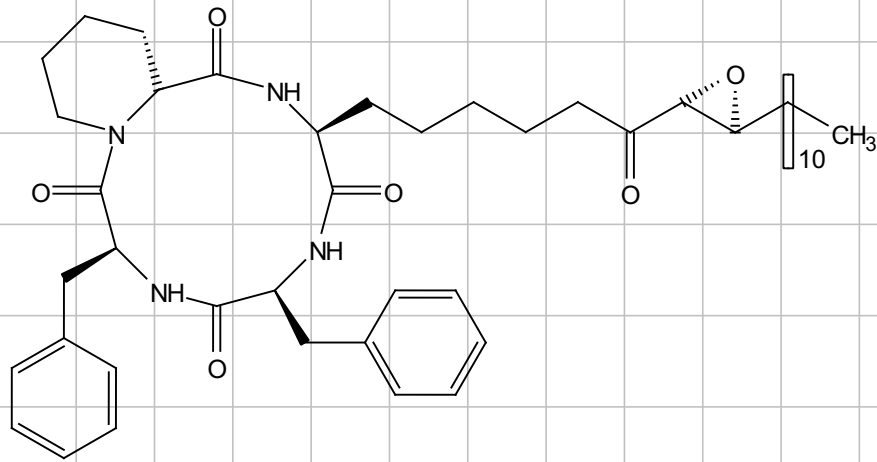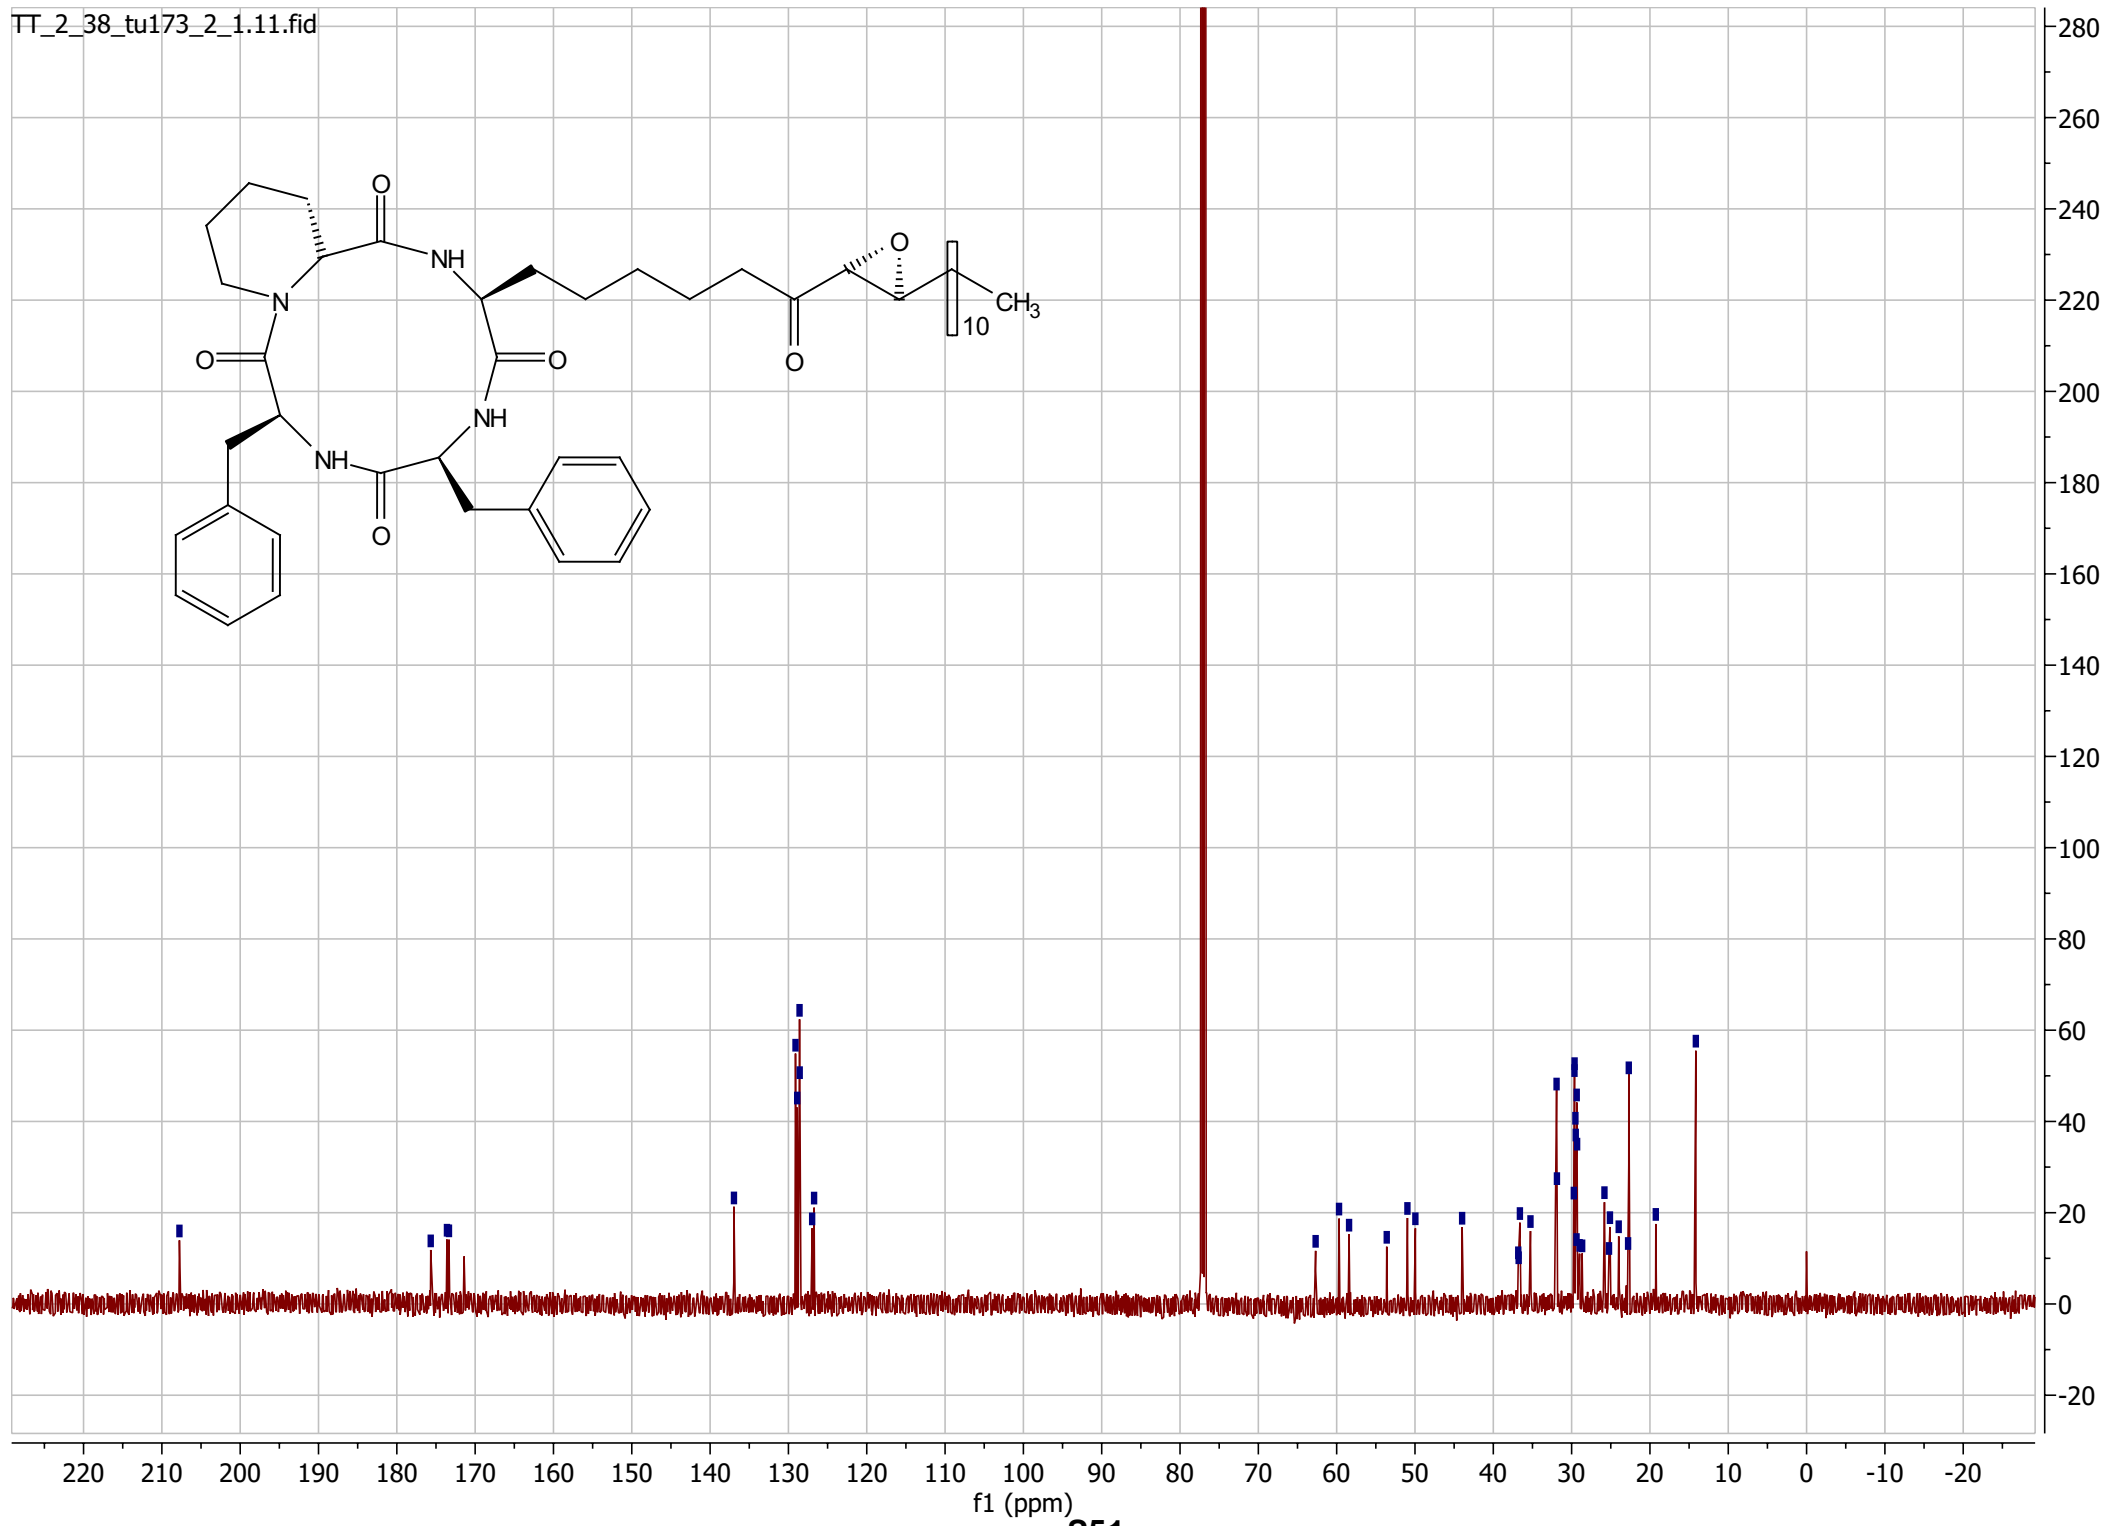

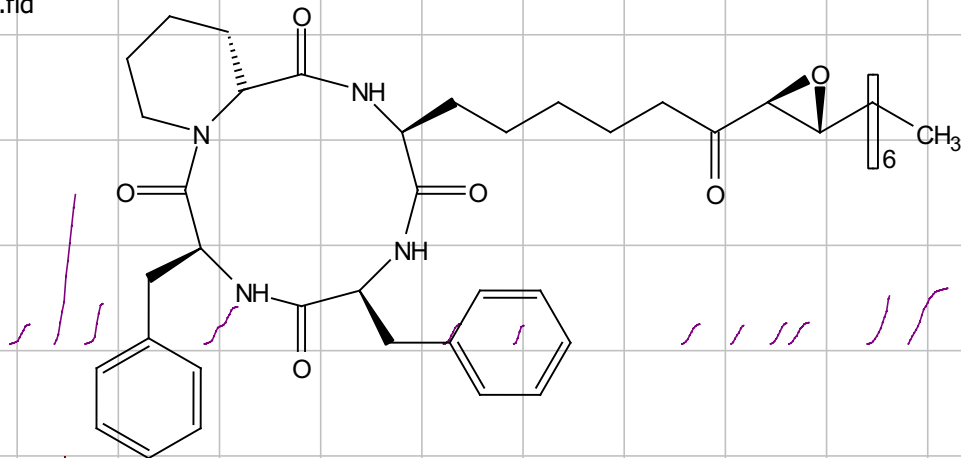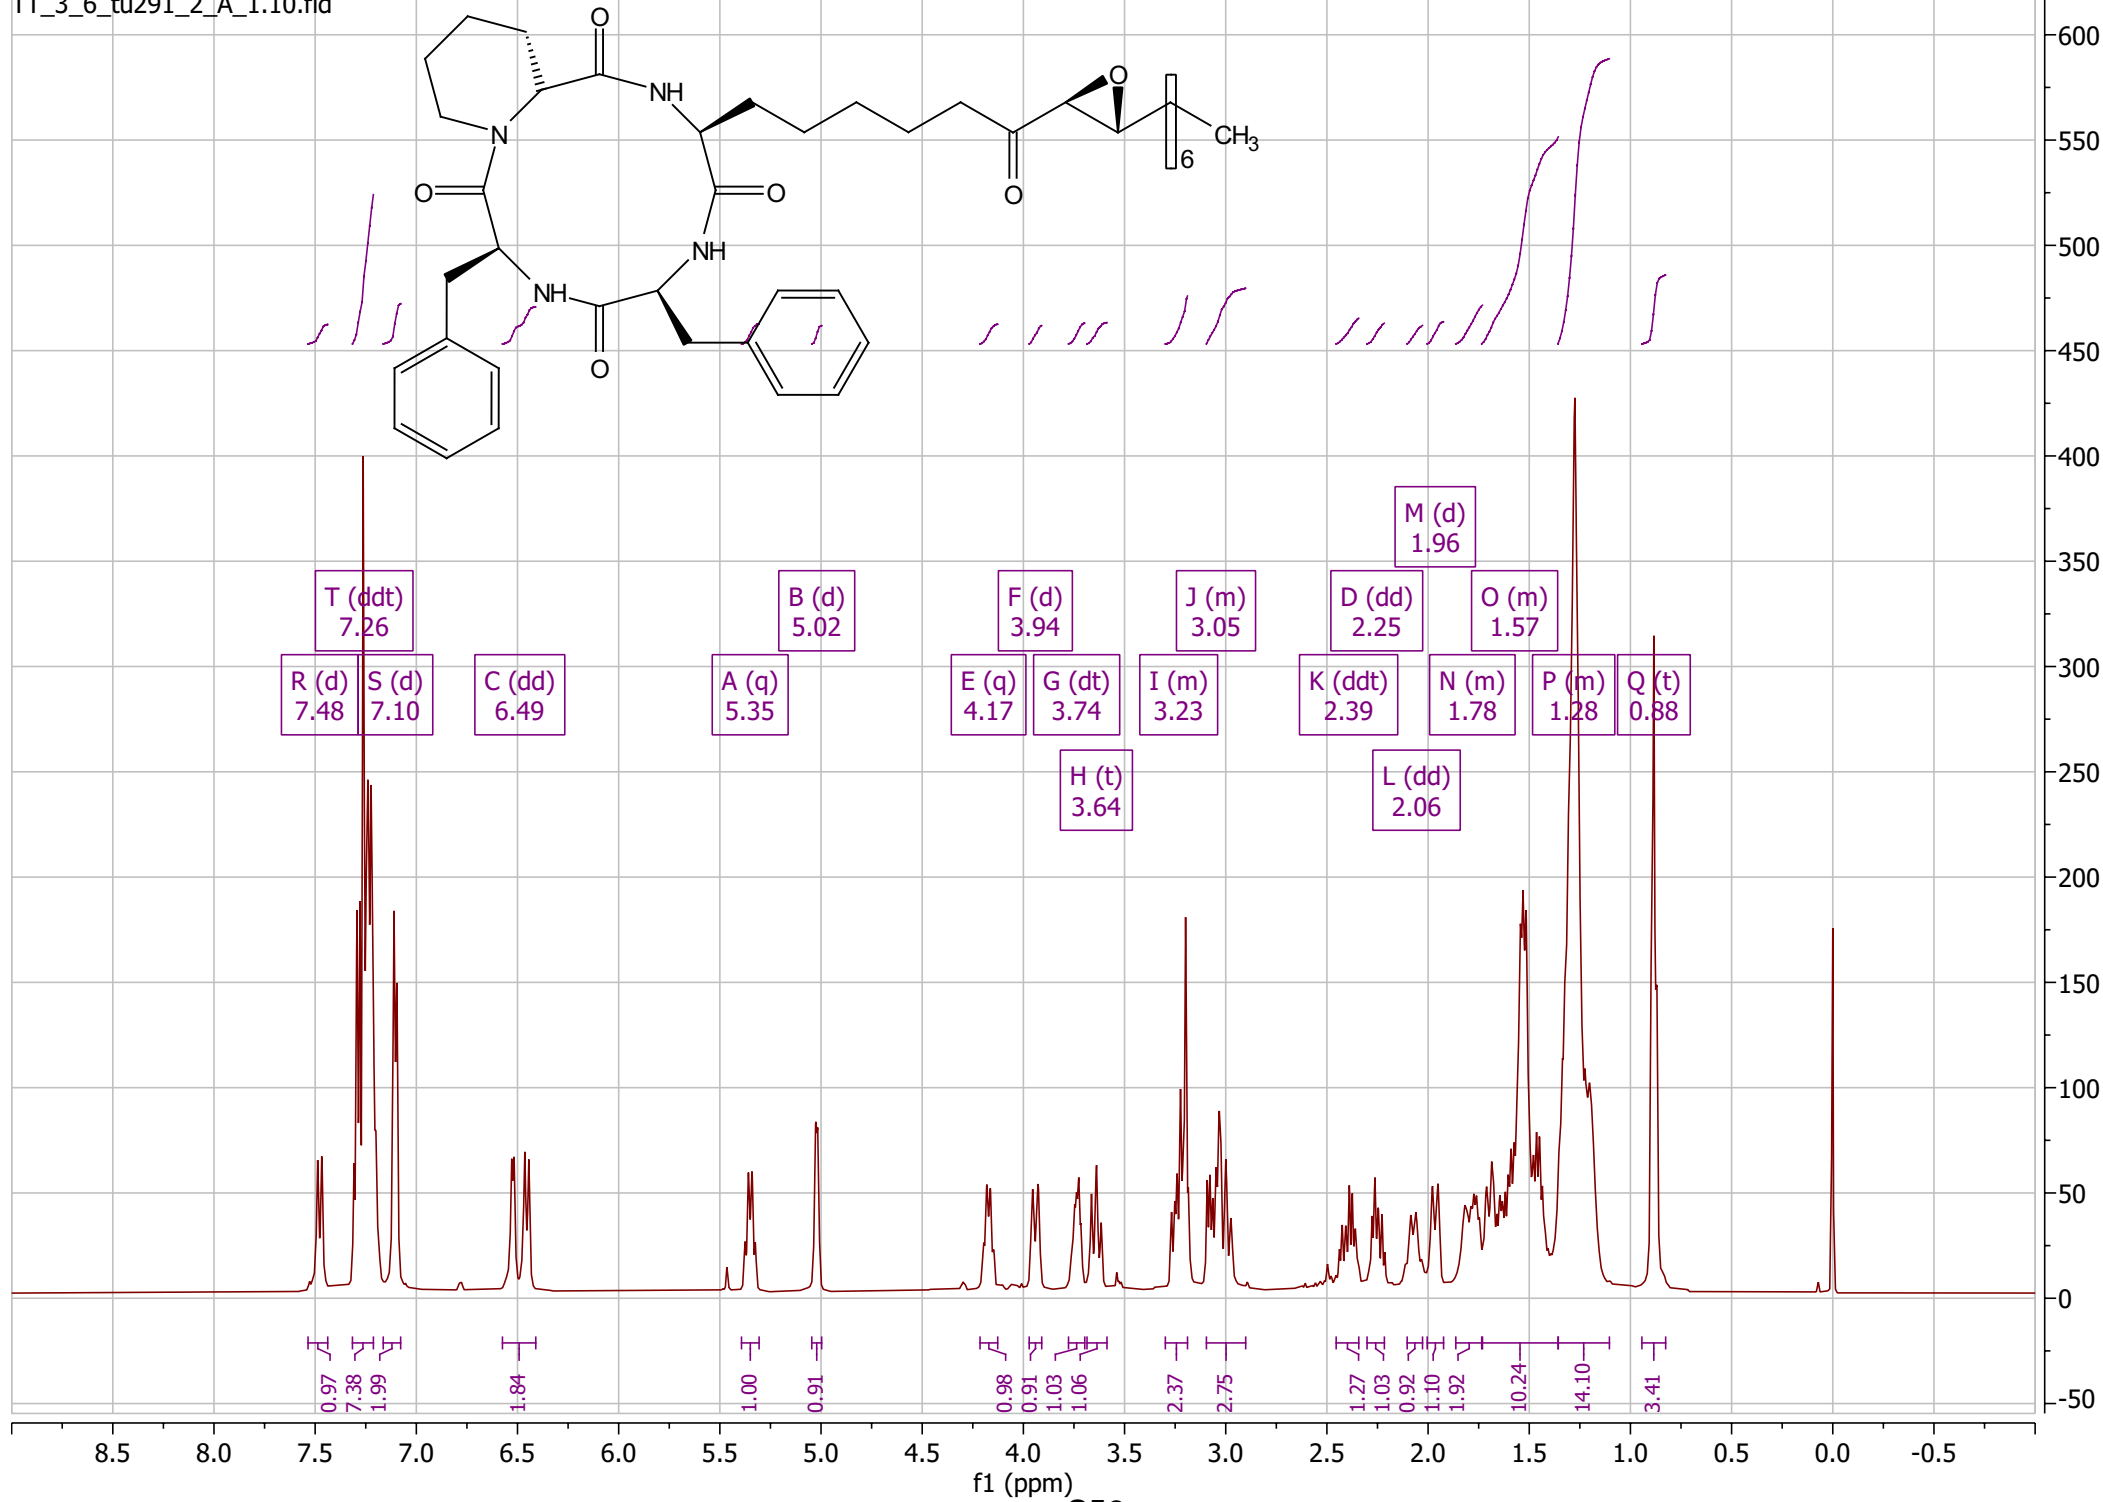

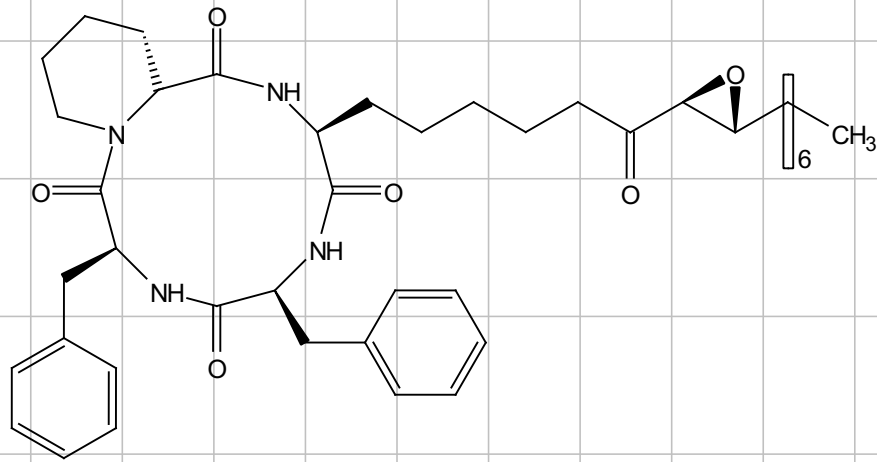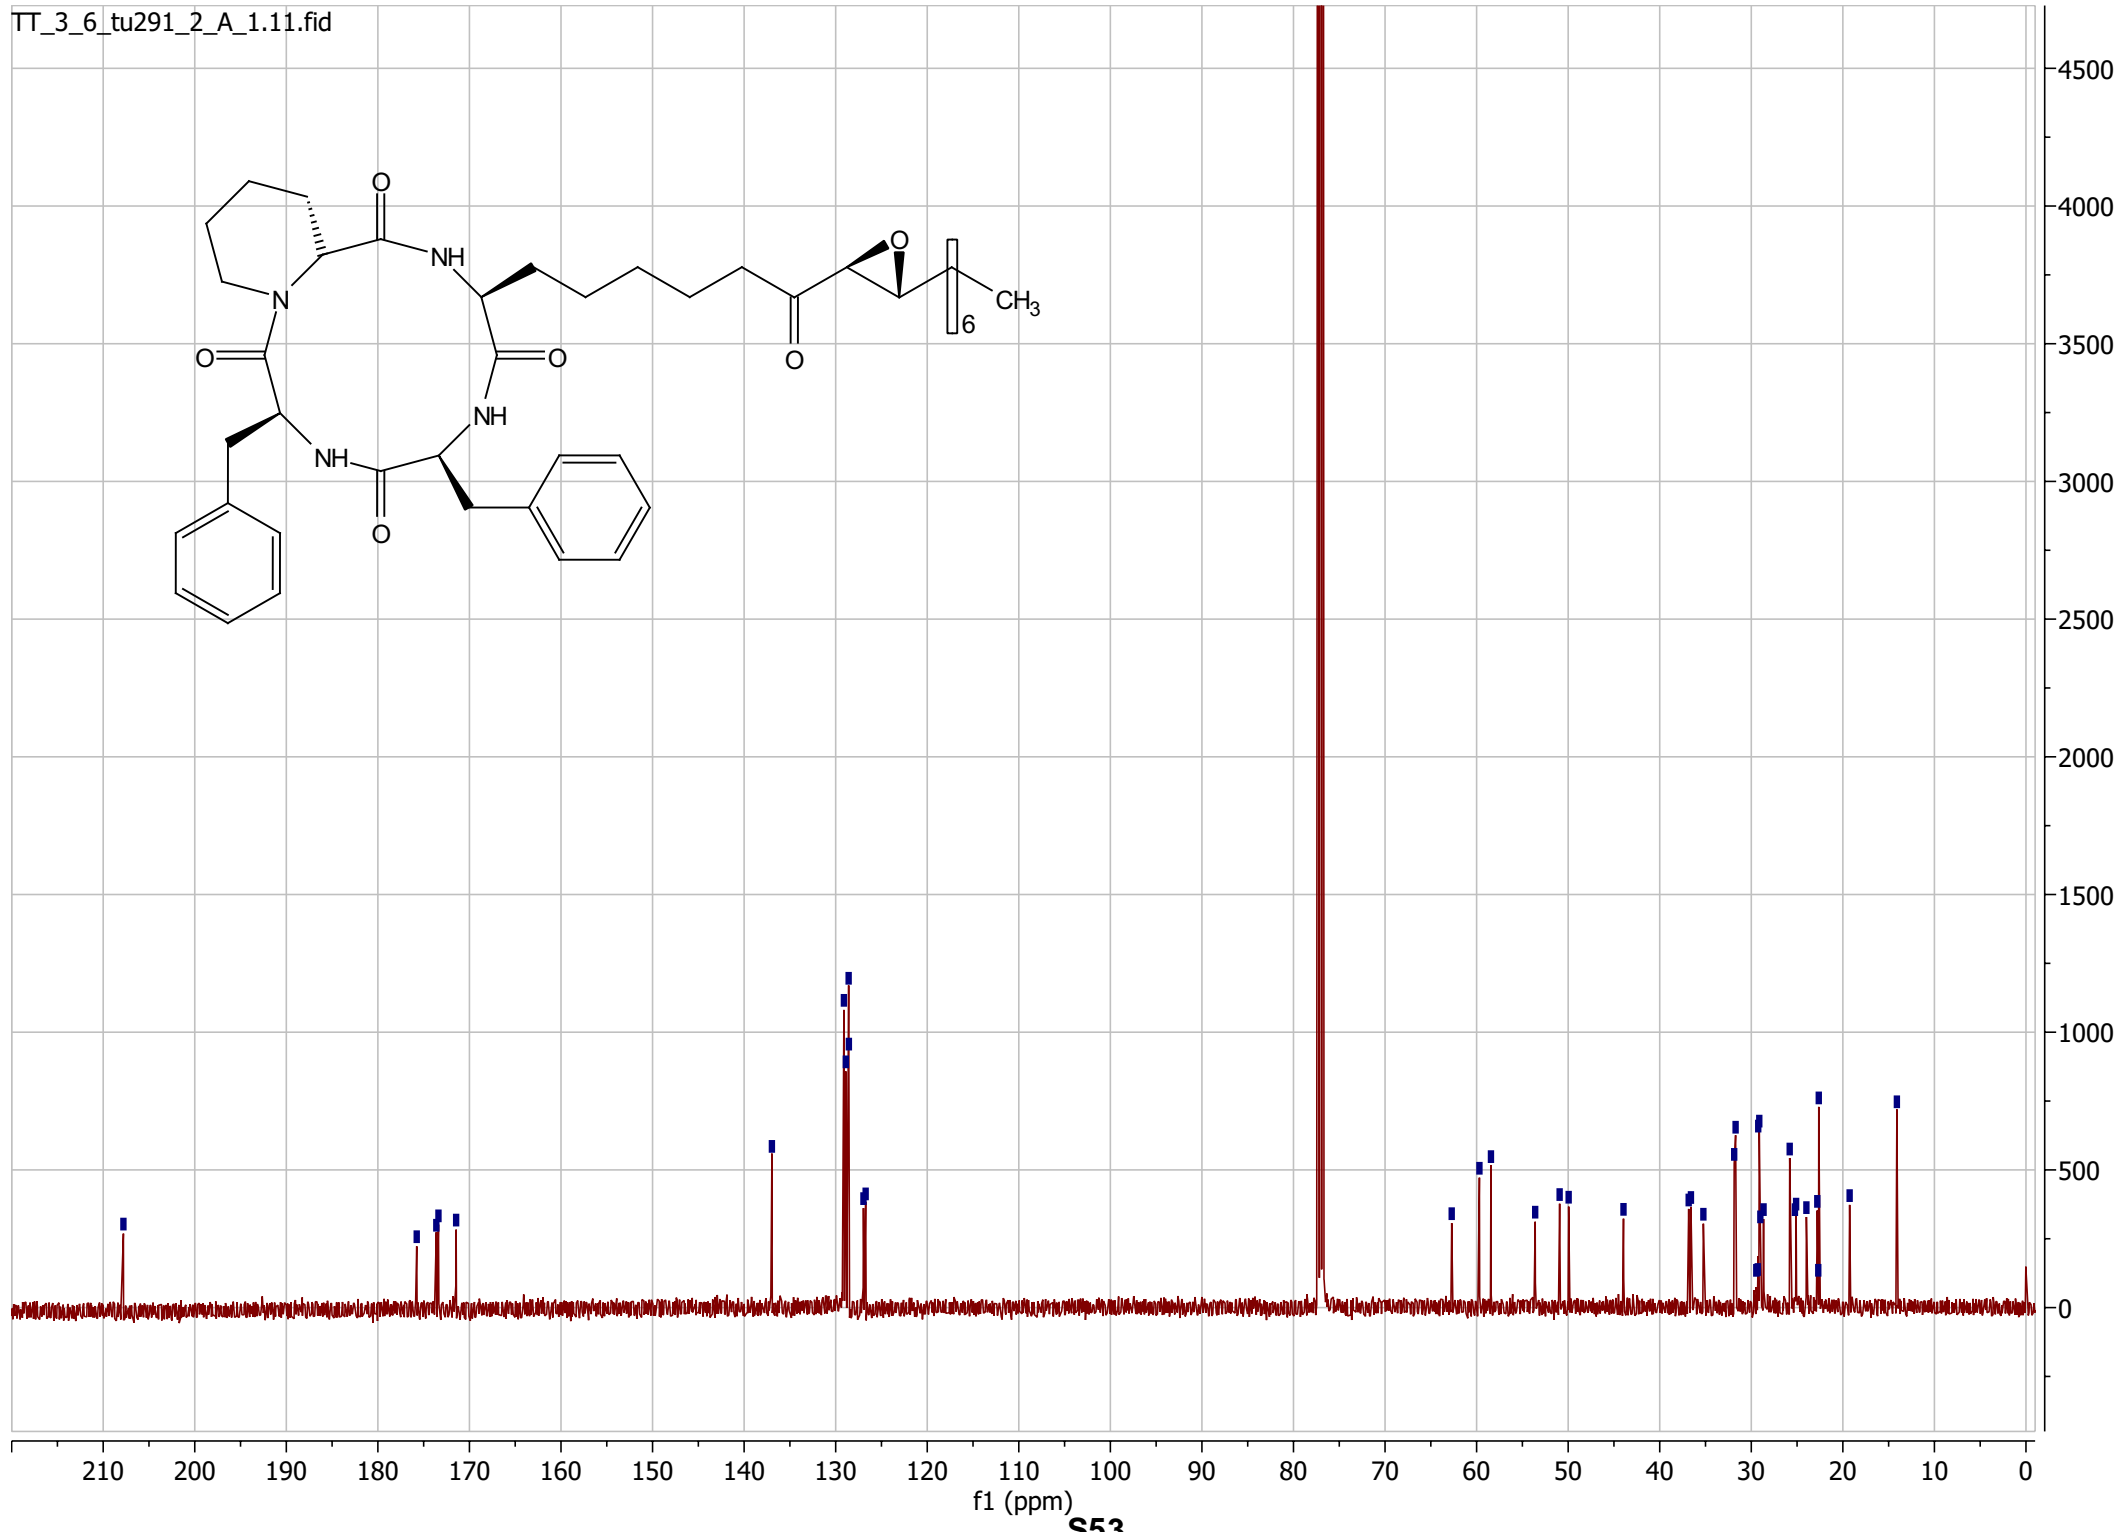

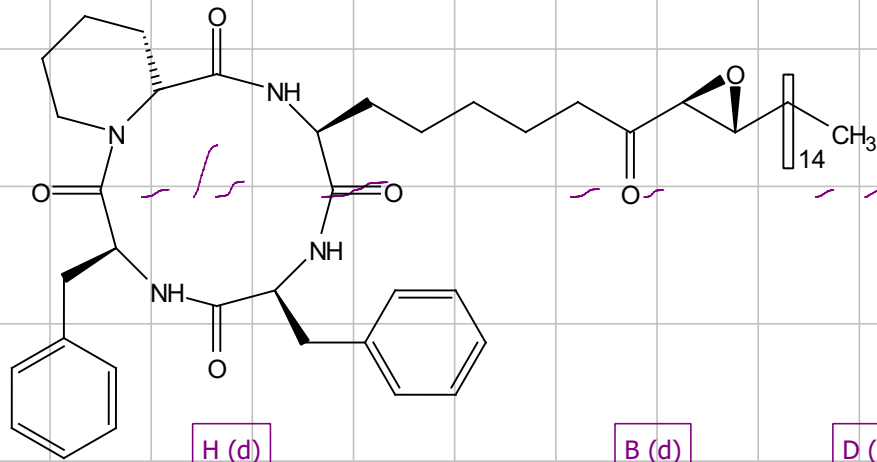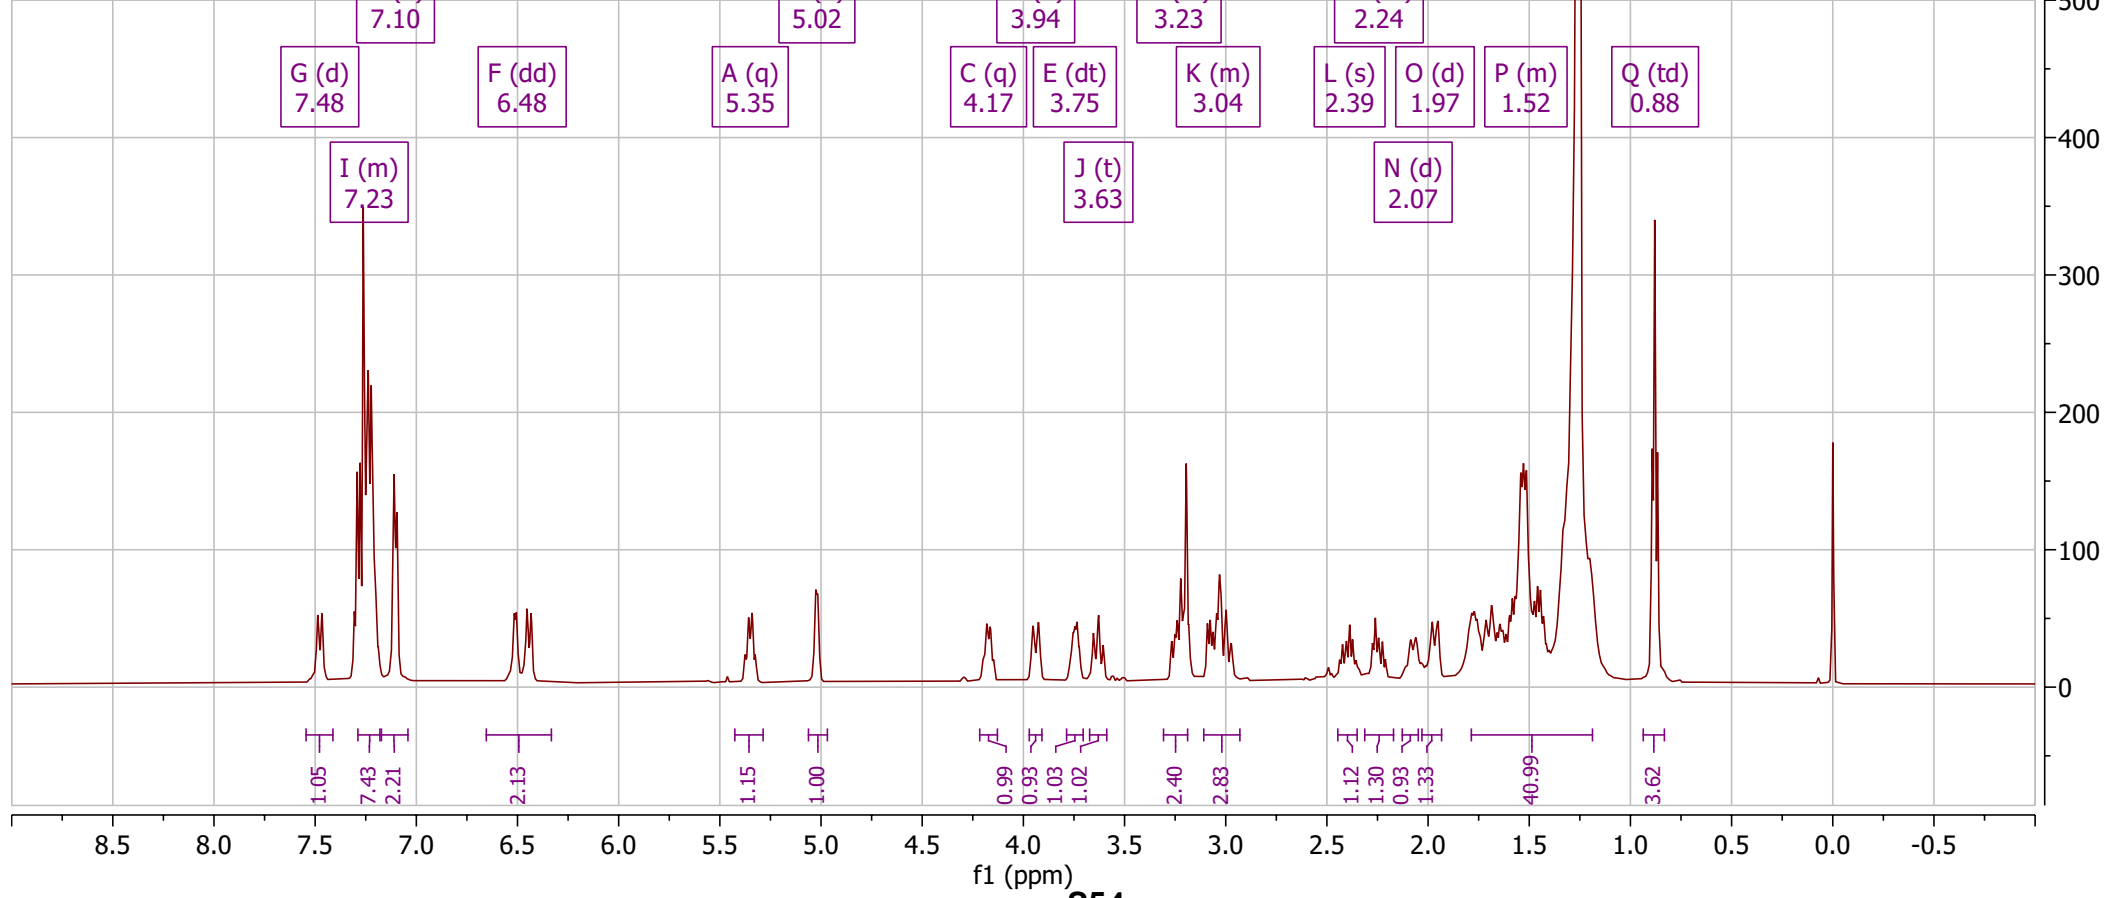

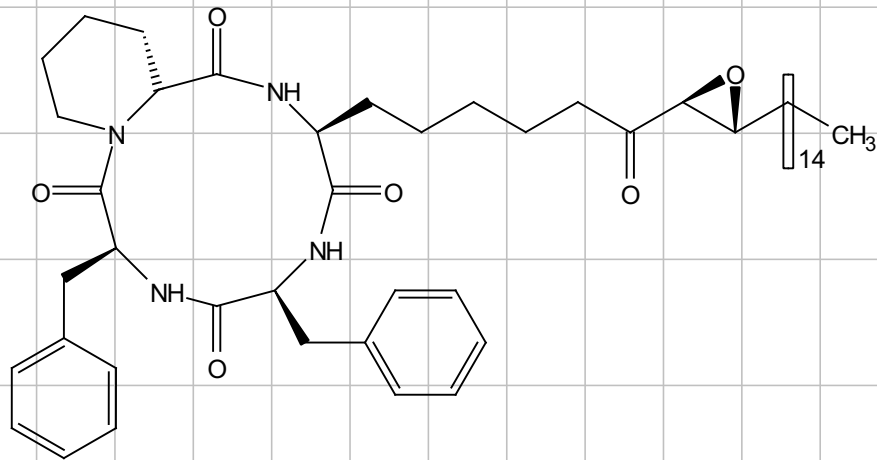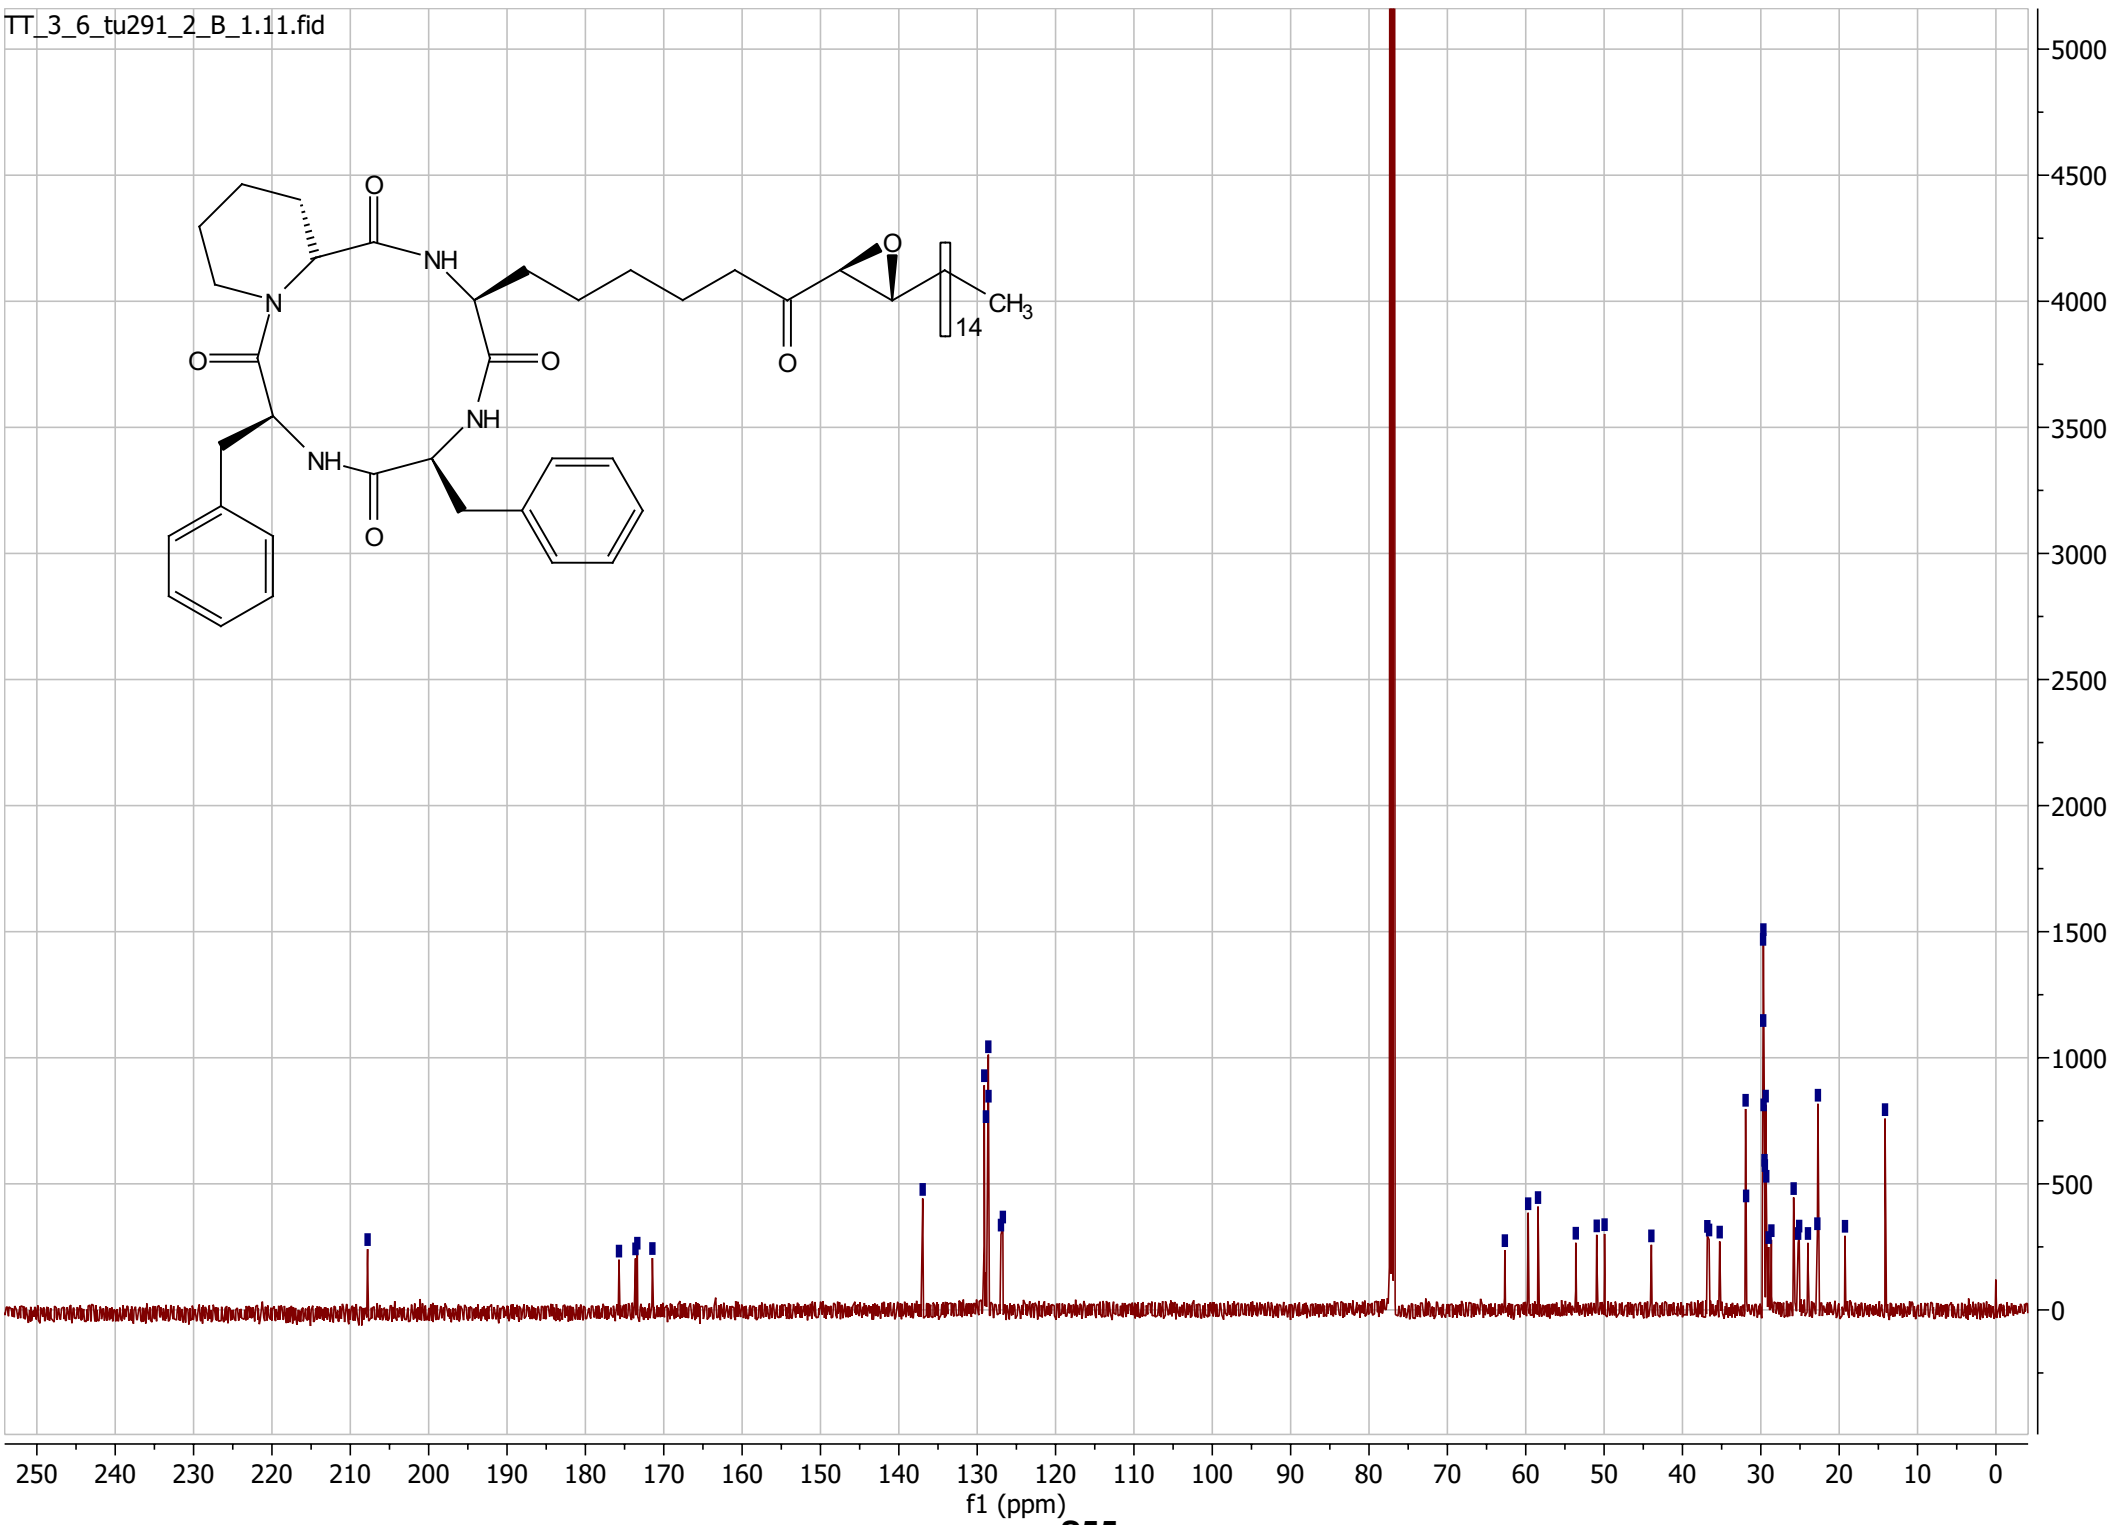

Supplement: cb2c00840_si_001.pdf [file cb2c00840_si_001.pdf]
